# Supplementary material for: A multi-task deep learning neural network for predicting flammability-related properties from molecular structures
Source: Royal Society of Chemistry journal article supplement (doi:10.1039/d1gc00331c), 2021-01-01
Supplement: d1gc00331c1.pdf [file d1gc00331c1.pdf]

1 **SUPPORTING INFORMATION**

2 **A multi-task deep learning neural network for predicting flammability-**  
3 **related properties from molecular structures**

4 *Ao Yang<sup>‡a,b</sup>, Yang Su<sup>‡c,a</sup>, Zihao Wang<sup>a</sup>, Saimeng Jin<sup>a</sup>, Jingzheng Ren<sup>b</sup>, Xiangping Zhang<sup>d</sup>,*

5 *Weifeng Shen<sup>\*a</sup> and James H. Clark<sup>e</sup>*

6 *<sup>a</sup>School of Chemistry and Chemical Engineering, Chongqing University, Chongqing 400044, China*

7 *<sup>b</sup>Department of Industrial and Systems Engineering, The Hong Kong Polytechnic University, Hong*  
8 *Kong SAR, China*

9 *<sup>c</sup>School of Intelligent Technology and Engineering, Chongqing University of Science and Technology,*  
10 *Chongqing 401331, China*

11 *<sup>d</sup>Beijing Key Laboratory of Ionic Liquids Clean Process, CAS Key Laboratory of Green Process and*  
12 *Engineering, Institute of Process Engineering, Chinese Academy of Sciences, Beijing, 100190, China*

13 *<sup>e</sup>Green Chemistry Centre of Excellence, University of York, York YO105D, UK*

14 *\*Correspondence should be addressed to: Weifeng Shen ([shenweifeng@cqu.edu.cn](mailto:shenweifeng@cqu.edu.cn))*

15 *‡These authors contributed equally to this work.*

16 **S1. Signature descriptors**

17 The signature descriptor<sup>1</sup> is an effective tool for encoding molecular structures with all  
18 atomic neighborhood into strings. This descriptor involving two forms: the first one is the  
19 atomic signatures generated at a specified root atom in a molecule, the other one is the molecular  
20 signatures combined from all atom signatures linearly. The size of each atomic signature is  
21 determined by a parameter named “height”,  $h$ . An atomic Signature is a tree subgraph including  
22 all atoms/bonds extending out to the predefined distance  $h$  without backtracking. The atomic  
23 signature at a specified height  $h$  can be formally represented as  ${}^h\sigma_{G(x)}$  for the root atom  $x$  of a  
24 2D molecular graph  $G = (V, E)$ . Here, the symbols,  $V$  and  $E$ , refers to the vertex (atom) set and  
25 edge (bond) set, respectively. Acetaldoxime (CAS No. 107-29-9) is taken as an example to  
26 provide atomic signatures shown in **Figure S1**.

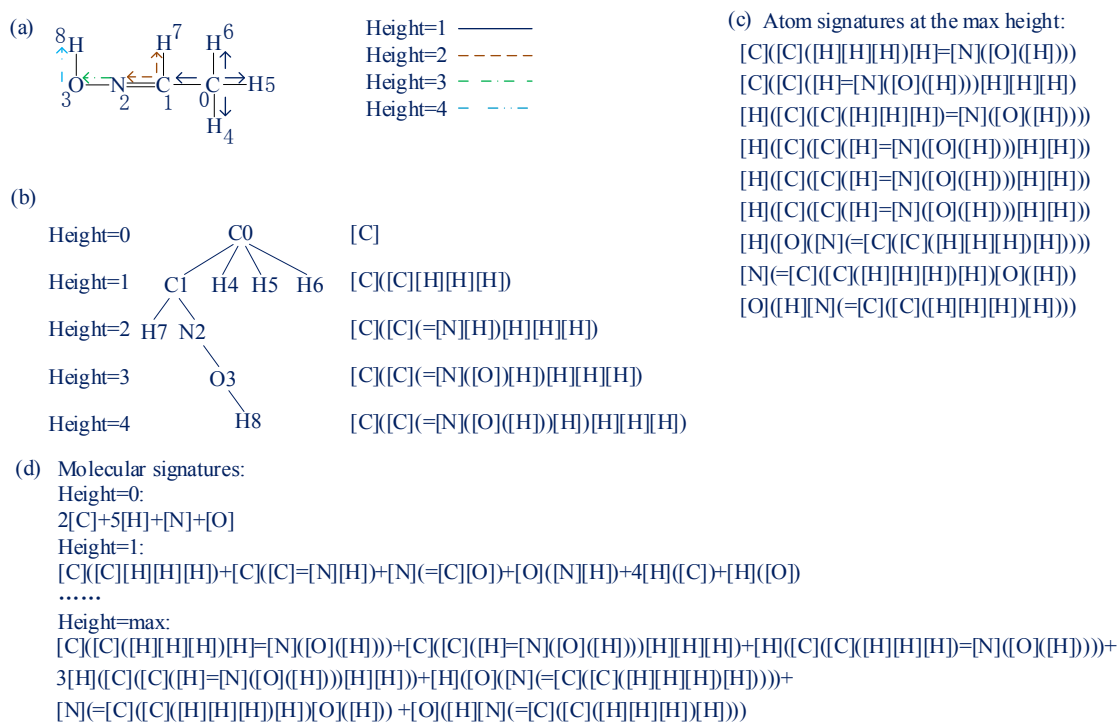

27

28 **Figure S1.** The translation example of signature descriptors for the molecule of acetaldoxime.

29 **Note:** The root atom numbered zero in the example for acetaldoxime is the terminal carbon in the recursive  
 30 algorithm. An atomic signature begins from this root atom, steps forward a predetermined height, and records  
 31 all the atoms encountered on the path are connected to the root atom. The process is repeated for all atoms in  
 32 the molecule at a certain height, and then a molecular signature will be achieved by a linear combination of  
 33 all the atomic signatures. In this figure, the molecular signature at the max height is exemplified for  
 34 acetaldoxime: (a) the molecular structure; (b) tree form and atomic signatures of different heights from a  
 35 certain atom; (c) the atomic signatures at the max height; (d) the molecular signature combined from the  
 36 atomic signatures at the max height. Each atomic signature could be considered as a tree data structure stored  
 37 in the format of DAG. In the encoding strings, the atoms found further down the tree of a branch point atom  
 38 are marked by nested parenthesis. Single bonds between atoms are omitted in atomic signatures, while other  
 39 bond-types are presented as follows (“=” is a double bond; “#” is a triple bond; “:” is an aromatic bond.)

## 40 S2. Vectorizing vertexes of DAGs

41 As mentioned above, the signature descriptors are stored as DAGs in silico and represented  
 42 by strings for easy reading, but it cannot be directly used like the other numerical descriptors  
 43 (e.g. topological indices, occurrences of molecular sub-structures, microscopic and quantum  
 44 properties) in the mathematical models. Hence, an approach was developed to transform atomic  
 45 signatures into vectors for the subsequent computation. In this method, all bonds were traversed  
 46 in a molecule and recorded into a list of strings. Afterwards, these strings like “A-B” (A and B  
 47 represents atoms in a bond, “-” presents a bond type) were split into two part, “A” and “-B”, as  
 48 the samples to train a word embedding neural network with the skip-gram<sup>2,3</sup> algorithm. In this

49 way, the substrings “A” and “-B” can be mapped into vectors as inputs for each node in a Tree-  
 50 LSTM<sup>4</sup> network. In other words, a molecule is considered as a sentence in the embedding  
 51 algorithm, and “A” or “-B” is equivalent to a word.

52 The embedding neural network<sup>2,5</sup> is shown in **Figure S2**. In the training process, 170  
 53 substrings shown in **Table S1** are extracted from the chemical bonds of 23709 molecules  
 54 (retrieved from PubChem<sup>6</sup>), and then they are converted to 170 vectors by the embedding  
 55 algorithm. These 48-dimensional vectors will be used as input data for every node of the Tree-  
 56 LSTM network.

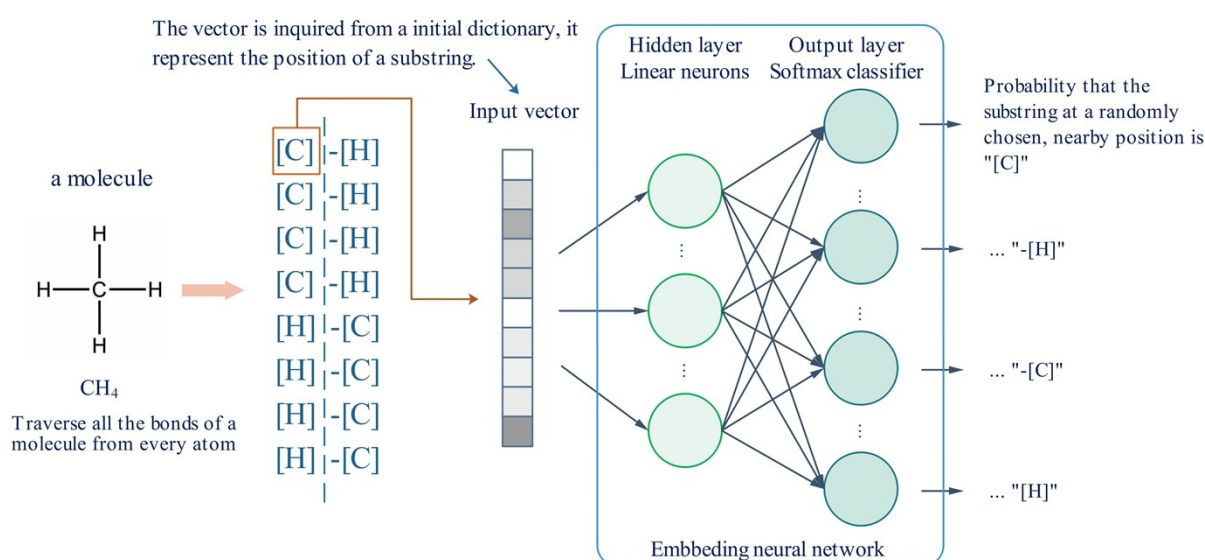

57

58

**Figure S2.** The embedding neural network for vectorizing the bond-strings.

59

**Table S1.** The list of substrings captured from chemical bonds

|             |             |            |           |            |             |            |
|-------------|-------------|------------|-----------|------------|-------------|------------|
| -[[C@@]r,0] | =[C]        | =[Al]      | -[C r,3]  | -[n r]     | [P]         | -[N r,5]   |
| [N]         | -[N r,0]    | [C r]      | [O r]     | :[n r,2]   | -[O r,1]    | -[Cl+2]    |
| [Se]        | -[c r]      | [C]        | [c r]     | [S]        | -[[C@]r,2]  | -[Hg]      |
| [Cl]        | [P r]       | =[C r]     | [Pb]      | [B]        | =[Mg]       | -[Fe]      |
| -[O]        | #[C-]       | :[c r,0]   | -[[C@]r]  | -[P r]     | [O-]        | [Ge]       |
| -[3H]       | -[[Si]r]    | =[S]       | [Ga]      | =[N r]     | =[N+]       | [S-]       |
| =[C r,0]    | -[N r]      | -[[C@]r,3] | [Hg]      | [F]        | [I]         | -[Tl]      |
| -[S r]      | -[[C@@]r,4] | [Sn]       | -[B]      | /=[N]      | -[[C@@]r,2] | :[c r,1]   |
| -[N r,3]    | -[F]        | -[[n+]r]   | -[Cl+]    | -[[C@]r,0] | :[n r,0]    | -[[Si]r,0] |
| :[c r,2]    | :[c r,5]    | =[Ca]      | :[c r]    | -[C r,1]   | =[N r,1]    | -[Al+]     |
| :[s r,1]    | :[n r,1]    | -[S-]      | =[B]      | [s r]      | -[C r,4]    | -[C r,2]   |
| [Tl]        | -[N r,4]    | -[S r,1]   | -[S]      | [[Si]r]    | :[[n+]r,0]  | [O]        |
| -[Cl]       | /=[C r]     | /=[C r]    | /=[C r,0] | =[P r]     | -[V]        | -[O r,0]   |
| -[Si]       | =[Pb]       | /=[N]      | #[C]      | [N-]       | #[N]        | :[o r,0]   |

|          |               |              |            |          |              |          |
|----------|---------------|--------------|------------|----------|--------------|----------|
| /=[C]    | -[P]          | #[B]         | #[Si]      | [Si+]    | [2H]         | [V]      |
| -[Br]    | :[o r,1]      | [Br]         | -[Cl+3]    | -[C@]    | =[N]         | =[O]     |
| =[P]     | -[c r,2]      | :[o r]       | -[[As]]r]  | :[c r,3] | -[O-]        | =[C r,1] |
| -[S r,0] | -[P r,0]      | -[[C@]]r,4]  | -[c r,1]   | [n r]    | -[c r,3]     | -[O r,2] |
| -[N+]    | -[C r,0]      | -[[C@@]]r,1] | [N r]      | -[I]     | :[s r]       | -[Al]    |
| [[n+]]r] | -[C@@]        | :[c r,6]     | :[[[n+]]r] | [Zn]     | -[[[n+]]r,2] | =[Fe]    |
| -[Ge]    | :[n r]        | -[[C@@]]r]   | -[C r]     | [o r]    | -[H]         | [N+]     |
| -[C]     | -[[[C@@]]r,3] |              |            |          |              |          |

60 For example, the 48-dimensional vector representing the substring “=[C]” is shown as  
 61 below:

62 [-1.578784935, -0.956886004, 0.513971263, 0.663698777, 0.683678891, 1.381063777,  
 63 0.116869597, 0.978596890, -0.044261189, 1.100085196, 0.460453439, 0.486235177, -  
 64 0.229623520, 1.425614274, 1.613233129, 0.838176610, 0.757844079, -1.444321924,  
 65 0.391216566, 0.341012802, 0.281424870, 0.980665070, 0.519018905, -0.973128510, -  
 66 1.507159523, 1.203545613, -0.988369549, 1.148227519, -0.461554489, 0.889267031, -  
 67 0.196072090, -1.235736984, 0.380164882, 0.185392539, 0.035732845, -0.370580514, -  
 68 0.107188924, -0.747444696, -0.693745025, 0.641271283, -0.050877589, -0.089852803,  
 69 0.638988558, -0.515607390, -1.068447242, 0.787464626, -0.122845660, 0.269591319]

### 70 S3. Tree-LSTM network

71 The Tree-LSTM neural network is employed for depicting molecular tree data-structures  
 72 with the atomic signatures in this study. we chose the  $N$ -ary Tree-LSTM model<sup>4</sup> as listed from  
 73 Eqs. S1 to S6 designed for the constituency tree to mimic the topological structure of an atomic  
 74 signature. The gating vectors and memory cell updates of the Tree-LSTM are dependent on the  
 75 states of child units, which is different than the standard LSTM. Especially, the  $N$ -ary Tree-  
 76 LSTM model can be utilized in the tree structure where the branching factor is at most  $N$  and  
 77 where children are ordered from 1 to  $N$ . For any node  $j$ , the hidden state and memory cell of its  
 78  $k^{\text{th}}$  child are written as  $h_{jk}$  and  $c_{jk}$ , respectively. The introduction of separate parameter matrices  
 79 for each child  $k$  allows the  $N$ -ary Tree-LSTM model to learn more fine-grained conditioning on  
 80 the states of a unit’s children.

81 In this model, the variable  $x_j$  is the input vector representing a substring of a bond (“A” or  
 82 “-B”), and the vector  $h_j$  is the output vector representing a molecular structure. The vector  $h_j$  is  
 83 finally associated with the properties by the FNN. The FNN involves an input layer, a hidden

84 layer and an output layer. For other variables and functions in **Eqs. (S1)-(S6)**,  $W^{(i,o,u,f)}$ ,  $U^{(i,o,u,f)}$ ,  
 85  $b^{(i,o,u,f)}$  are parameters that need to be learned, and  $\sigma$  represents the activation function sigmoid.  
 86 For example, the model can learn parameters  $W^{(i)}$  such that the components of the input gate  $i_j$   
 87 have values close to 1 (*i.e.*, “open”) when an important atom is given as input, and values close  
 88 to 0 (*i.e.*, “closed”) when the input is a less important atom.

$$89 \quad i_j = \sigma(W^{(i)}x_j + \sum_{l=1}^N U_l^{(i)}h_{jl} + b^{(i)}) \quad (\text{S1})$$

$$90 \quad f_{jk} = \sigma(W^{(f)}x_j + \sum_{l=1}^N U_{kl}^{(f)}h_{jl} + b^{(f)}) \quad (\text{S2})$$

$$91 \quad o_j = \sigma(W^{(o)}x_j + \sum_{l=1}^N U_l^{(o)}h_{jl} + b^{(o)}) \quad (\text{S3})$$

$$92 \quad u_j = \tanh(W^{(u)}x_j + \sum_{l=1}^N U_l^{(u)}h_{jl} + b^{(u)}) \quad (\text{S4})$$

$$93 \quad c_j = i_j \cdot u_j + \sum_{l=1}^N f_{jl} \cdot c_{jl} \quad (\text{S5})$$

$$94 \quad h_j = o_j \cdot \tanh(c_j) \quad (\text{S6})$$

#### 95 **S4. Compound list**

96 **Table S2.** The compounds correlated in the QSPR modeling for FPT

| Name                       | Index |
|----------------------------|-------|
| METHANE                    | 0     |
| ETHANE                     | 1     |
| PROPANE                    | 2     |
| ISOBUTANE                  | 3     |
| n-BUTANE                   | 4     |
| 1,1,3-TRIMETHYLCYCLOHEXANE | 5     |
| n-PENTANE                  | 6     |
| ISOPENTANE                 | 7     |
| NEOPENTANE                 | 8     |
| n-HEXANE                   | 9     |
| 2-METHYLPENTANE            | 10    |
| 2,2-DIMETHYLBUTANE         | 12    |
| 2,3-DIMETHYLBUTANE         | 13    |
| n-HEPTANE                  | 14    |
| 2-METHYLHEXANE             | 15    |
| 3-METHYLHEXANE             | 16    |
| 2,2-DIMETHYLPENTANE        | 18    |
| 2,4-DIMETHYLPENTANE        | 20    |
| 3,3-DIMETHYLPENTANE        | 21    |
| 2,2,3-TRIMETHYLBUTANE      | 22    |

---

|                            |    |
|----------------------------|----|
| n-OCTANE                   | 23 |
| 2-METHYLHEPTANE            | 24 |
| 3-METHYLHEPTANE            | 25 |
| 4-METHYLHEPTANE            | 26 |
| 3-ETHYLHEXANE              | 27 |
| 2,2-DIMETHYLHEXANE         | 28 |
| 2,3-DIMETHYLHEXANE         | 29 |
| 2,4-DIMETHYLHEXANE         | 30 |
| 2,5-DIMETHYLHEXANE         | 31 |
| 3,4-DIMETHYLHEXANE         | 33 |
| 3-METHYL-3-ETHYLPENTANE    | 35 |
| 2,2,3-TRIMETHYLPENTANE     | 36 |
| 2,2,4-TRIMETHYLPENTANE     | 37 |
| 2,3,3-TRIMETHYLPENTANE     | 38 |
| 2,3,4-TRIMETHYLPENTANE     | 39 |
| 2,2,3,3-TETRAMETHYLBUTANE  | 40 |
| n-NONANE                   | 41 |
| 2,2,5-TRIMETHYLHEXANE      | 42 |
| 3,3,5-TRIMETHYLHEPTANE     | 43 |
| 2,4,4-TRIMETHYLHEXANE      | 44 |
| 3,3-DIETHYLPENTANE         | 45 |
| 2,2,3,3-TETRAMETHYLPENTANE | 46 |
| 2,2,3,4-TETRAMETHYLPENTANE | 47 |
| 2,2,4,4-TETRAMETHYLPENTANE | 48 |
| 2,3,3,4-TETRAMETHYLPENTANE | 49 |
| SQUALANE                   | 50 |
| n-DECANE                   | 51 |
| iso-BUTYLCYCLOHEXANE       | 54 |
| tert-BUTYLCYCLOHEXANE      | 55 |
| n-UNDECANE                 | 56 |
| n-DODECANE                 | 57 |
| n-TRIDECANE                | 58 |
| n-TETRADECANE              | 59 |
| n-PENTADECANE              | 60 |
| n-HEXADECANE               | 61 |
| n-HEPTADECANE              | 62 |
| n-OCTADECANE               | 63 |
| n-NONADECANE               | 64 |
| n-EICOSANE                 | 66 |
| 3-METHYLNONANE             | 76 |
| 2-METHYLNONANE             | 77 |
| 4-METHYLNONANE             | 78 |
| 5-METHYLNONANE             | 79 |
| 2-METHYLOCTANE             | 81 |

---

|                                  |     |
|----------------------------------|-----|
| 3-METHYLOCTANE                   | 82  |
| 4-METHYLOCTANE                   | 83  |
| 3-ETHYLHEPTANE                   | 84  |
| 2,2-DIMETHYLHEPTANE              | 85  |
| CYCLOPENTANE                     | 92  |
| METHYLCYCLOPENTANE               | 93  |
| ETHYLCYCLOPENTANE                | 94  |
| n-PROPYLCYCLOPENTANE             | 100 |
| CYCLOHEXANE                      | 115 |
| METHYLCYCLOHEXANE                | 116 |
| ETHYLCYCLOHEXANE                 | 117 |
| 1,1-DIMETHYLCYCLOHEXANE          | 118 |
| cis-1,2-DIMETHYLCYCLOHEXANE      | 119 |
| trans-1,2-DIMETHYLCYCLOHEXANE    | 120 |
| cis-1,3-DIMETHYLCYCLOHEXANE      | 121 |
| cis-1,4-DIMETHYLCYCLOHEXANE      | 123 |
| 1-trans-3,5-TRIMETHYLCYCLOHEXANE | 125 |
| ISOPROPYLCYCLOHEXANE             | 127 |
| n-BUTYLCYCLOHEXANE               | 129 |
| cis-DECAHYDRONAPHTHALENE         | 130 |
| trans-DECAHYDRONAPHTHALENE       | 131 |
| BICYCLOHEXYL                     | 132 |
| 1,1-DIETHYLCYCLOHEXANE           | 133 |
| CYCLOHEPTANE                     | 135 |
| CYCLOOCTANE                      | 136 |
| 2,6-DIMETHYLHEPTANE              | 143 |
| 2,4-DIMETHYL-3-ETHYLPENTANE      | 145 |
| ETHYLENE                         | 146 |
| PROPYLENE                        | 147 |
| 1-BUTENE                         | 149 |
| cis-2-BUTENE                     | 150 |
| trans-2-BUTENE                   | 151 |
| ISOBUTENE                        | 152 |
| 1-PENTENE                        | 154 |
| cis-2-PENTENE                    | 155 |
| trans-2-PENTENE                  | 156 |
| 2-METHYL-1-BUTENE                | 157 |
| 3-METHYL-1-BUTENE                | 158 |
| 2-METHYL-2-BUTENE                | 159 |
| 1-HEXENE                         | 161 |
| cis-2-HEXENE                     | 162 |
| trans-2-HEXENE                   | 163 |
| trans-3-HEXENE                   | 165 |
| 2-METHYL-1-PENTENE               | 166 |

---

|                           |     |
|---------------------------|-----|
| 3-METHYL-1-PENTENE        | 167 |
| 4-METHYL-1-PENTENE        | 168 |
| 2-METHYL-2-PENTENE        | 169 |
| 3-METHYL-cis-2-PENTENE    | 170 |
| 4-METHYL-1-HEXENE         | 171 |
| 4-METHYL-cis-2-PENTENE    | 172 |
| 4-METHYL-trans-2-PENTENE  | 173 |
| 2-ETHYL-1-BUTENE          | 174 |
| 2,3-DIMETHYL-1-BUTENE     | 175 |
| 3,3-DIMETHYL-1-BUTENE     | 176 |
| 2,3-DIMETHYL-2-BUTENE     | 177 |
| 1-HEPTENE                 | 179 |
| cis-2-HEPTENE             | 180 |
| trans-2-HEPTENE           | 181 |
| trans-3-HEPTENE           | 182 |
| 2-METHYL-1-HEXENE         | 183 |
| 3-METHYL-1-HEXENE         | 185 |
| trans-2-NONENE            | 190 |
| VINYLCYCLOHEXANE          | 191 |
| 2,3,3-TRIMETHYL-1-BUTENE  | 193 |
| 1-OCTENE                  | 195 |
| trans-2-OCTENE            | 196 |
| 2,4,4-TRIMETHYL-1-PENTENE | 197 |
| 2,4,4-TRIMETHYL-2-PENTENE | 198 |
| 1-NONENE                  | 200 |
| 1-DECENE                  | 201 |
| 1-UNDECENE                | 202 |
| 1-DODECENE                | 203 |
| 1-TRIDECENE               | 204 |
| 1-TETRADECENE             | 205 |
| 1-HEXADECENE              | 207 |
| 1-OCTADECENE              | 208 |
| CYCLOPENTENE              | 210 |
| CYCLOHEXENE               | 211 |
| CYCLOHEPTENE              | 214 |
| CYCLOOCTENE               | 215 |
| cis-2-OCTENE              | 216 |
| trans-3-OCTENE            | 217 |
| cis-4-OCTENE              | 218 |
| trans-4-OCTENE            | 219 |
| cis-3-OCTENE              | 220 |
| VINYLCYCLOHEXENE          | 224 |
| 1-METHYLCYCLOPENTENE      | 225 |
| 2,3-DIMETHYL-1-HEXENE     | 228 |



---

|                               |     |
|-------------------------------|-----|
| d-LIMONENE                    | 229 |
| TERPINOLENE                   | 230 |
| 1,3-BUTADIENE                 | 238 |
| cis-1,3-PENTADIENE            | 240 |
| trans-1,3-PENTADIENE          | 241 |
| 1,4-PENTADIENE                | 242 |
| ISOPRENE                      | 244 |
| 1,5-HEXADIENE                 | 245 |
| 3-METHYL-1,2-BUTADIENE        | 246 |
| METHYLCYCLOPENTADIENE         | 247 |
| 1,4-HEXADIENE                 | 248 |
| trans,trans-2,4-HEXADIENE     | 249 |
| DICYCLOPENTADIENE             | 251 |
| alpha-PHELLANDRENE            | 252 |
| beta-PHELLANDRENE             | 253 |
| 2,3-DIMETHYL-1,3-BUTADIENE    | 254 |
| cis,trans-2,4-HEXADIENE       | 255 |
| 1,5,9-CYCLODODECATRIENE       | 257 |
| 2,5-DIMETHYL-1,5-HEXADIENE    | 258 |
| 2,5-DIMETHYL-2,4-HEXADIENE    | 259 |
| 1,3-CYCLOHEXADIENE            | 260 |
| 1,4-CYCLOHEXADIENE            | 261 |
| 1,5-CYCLOOCTADIENE            | 262 |
| trans-1,3-HEXADIENE           | 263 |
| trans-2-METHYL-1,3-PENTADIENE | 264 |
| 1,9-DECADIENE                 | 265 |
| 1-PENTYNE                     | 271 |
| 2-HEXYNE                      | 273 |
| 2-PENTYNE                     | 275 |
| 1-HEXYNE                      | 276 |
| 1-OCTYNE                      | 278 |
| 1-PENTENE-3-YNE               | 281 |
| 1-NONYNE                      | 284 |
| 1-DECYNE                      | 285 |
| BENZENE                       | 286 |
| TOLUENE                       | 287 |
| ETHYLBENZENE                  | 289 |
| o-XYLENE                      | 290 |
| m-XYLENE                      | 291 |
| p-XYLENE                      | 292 |
| n-PROPYLBENZENE               | 294 |
| CUMENE                        | 295 |
| o-ETHYLTOLUENE                | 296 |
| m-ETHYLTOLUENE                | 297 |

---

|                            |     |
|----------------------------|-----|
| p-ETHYLTOLUENE             | 298 |
| 1,2,3-TRIMETHYLBENZENE     | 299 |
| 1,2,4-TRIMETHYLBENZENE     | 300 |
| MESITYLENE                 | 301 |
| n-BUTYLBENZENE             | 303 |
| ISOBUTYLBENZENE            | 304 |
| sec-BUTYLBENZENE           | 305 |
| tert-BUTYLBENZENE          | 306 |
| o-CYMENE                   | 307 |
| m-CYMENE                   | 308 |
| p-CYMENE                   | 309 |
| o-DIETHYLBENZENE           | 310 |
| m-DIETHYLBENZENE           | 311 |
| p-DIETHYLBENZENE           | 312 |
| 1,2,3,4-TETRAMETHYLBENZENE | 315 |
| 1,2,3,5-TETRAMETHYLBENZENE | 316 |
| 1,2,4,5-TETRAMETHYLBENZENE | 317 |
| 1,3,5-TRIISOPROPYLBENZENE  | 322 |
| PENTAMETHYLBENZENE         | 325 |
| m-DIISOPROPYLBENZENE       | 327 |
| p-DIISOPROPYLBENZENE       | 328 |
| 1,2,4-TRIETHYLBENZENE      | 329 |
| n-HEPTYLBENZENE            | 332 |
| n-DECYLBENZENE             | 334 |
| CYCLOHEXYLBENZENE          | 337 |
| BIPHENYL                   | 338 |
| p-TERPHENYL                | 339 |
| m-TERPHENYL                | 340 |
| o-TERPHENYL                | 341 |
| 1,1-DIPHENYLETHANE         | 342 |
| DIPHENYLMETHANE            | 343 |
| 1,2-DIPHENYLETHANE         | 344 |
| n-PENTYLBENZENE            | 347 |
| n-HEXYLBENZENE             | 348 |
| n-OCTYLBENZENE             | 349 |
| n-NONYLBENZENE             | 350 |
| n-DODECYLBENZENE           | 354 |
| 2-PHENYLBUTENE-1           | 362 |
| STYRENE                    | 378 |
| o-METHYLSTYRENE            | 379 |
| m-METHYLSTYRENE            | 380 |
| 5-o-TOLYL-2-PENTENE        | 381 |
| m-ETHYLSTYRENE             | 383 |
| p-METHYLSTYRENE            | 385 |

---

|                                |     |
|--------------------------------|-----|
| alpha-METHYLSTYRENE            | 386 |
| m-DIVINYLBENZENE               | 387 |
| ETHYNYLBENZENE                 | 388 |
| cis-1-PROPENYLBENZENE          | 391 |
| trans-1-PROPENYLBENZENE        | 392 |
| NAPHTHALENE                    | 395 |
| 1-METHYLNAPHTHALENE            | 396 |
| 2-METHYLNAPHTHALENE            | 397 |
| 1-ETHYLNAPHTHALENE             | 398 |
| 1,2,3,4-TETRAHYDRONAPHTHALENE  | 399 |
| 1-n-DECYLNAPHTHALENE           | 403 |
| 2-ETHYLNAPHTHALENE             | 410 |
| 1,2,3-TRIMETHYLINDENE          | 413 |
| METHYLCYCLOPENTADIENE DIMER    | 414 |
| INDENE                         | 423 |
| ANTHRACENE                     | 424 |
| PHENANTHRENE                   | 425 |
| PYRENE                         | 427 |
| VINYLNORBORNENE                | 431 |
| 1,3-DIMETHYLADAMANTANE         | 434 |
| INDANE                         | 438 |
| alpha-TERPINENE                | 439 |
| gamma-TERPINENE                | 440 |
| 2-NORBORNENE                   | 441 |
| 5-ETHYLIDENE-2-NORBORNENE      | 442 |
| sec-BUTYLCYCLOHEXANE           | 445 |
| CAMPHENE                       | 455 |
| alpha-PINENE                   | 456 |
| beta-PINENE                    | 457 |
| ACETALDEHYDE                   | 475 |
| PROPANAL                       | 476 |
| 1,2,3,6-TETRAHYDROBENZALDEHYDE | 477 |
| BUTANAL                        | 478 |
| 2-METHYLPROPANAL               | 479 |
| PENTANAL                       | 480 |
| HEPTANAL                       | 481 |
| HEXANAL                        | 482 |
| OCTANAL                        | 483 |
| NONANAL                        | 484 |
| CYCLOHEXANECARBOXALDEHYDE      | 485 |
| 2-ETHYLHEXANAL                 | 486 |
| 2-METHYL-2-PENTENAL            | 490 |
| 2-ETHYL-2-HEXENAL              | 491 |
| DECANAL                        | 492 |

---

|                         |     |
|-------------------------|-----|
| UNDECANAL               | 493 |
| DODECANAL               | 494 |
| 2-METHYLBUTYRALDEHYDE   | 496 |
| 3-METHYLBUTYRALDEHYDE   | 497 |
| ACROLEIN                | 499 |
| trans-CROTONALDEHYDE    | 501 |
| METHACROLEIN            | 502 |
| 2-PHENYLPROPIONALDEHYDE | 503 |
| o-TOLUALDEHYDE          | 504 |
| p-TOLUALDEHYDE          | 505 |
| BENZALDEHYDE            | 506 |
| SALICYLALDEHYDE         | 507 |
| m-TOLUALDEHYDE          | 510 |
| PARALDEHYDE             | 513 |
| ACETONE                 | 514 |
| METHYL ETHYL KETONE     | 515 |
| 3-PENTANONE             | 516 |
| METHYL ISOBUTYL KETONE  | 517 |
| 3-METHYL-2-PENTANONE    | 518 |
| 5-HEXEN-2-ONE           | 519 |
| 3-HEPTANONE             | 520 |
| 4-HEPTANONE             | 521 |
| 3-HEXANONE              | 522 |
| 2-PENTANONE             | 523 |
| METHYL ISOPROPYL KETONE | 524 |
| 2-HEXANONE              | 525 |
| 2-HEPTANONE             | 526 |
| 5-METHYL-2-HEXANONE     | 527 |
| MESITYL OXIDE           | 528 |
| 3,3-DIMETHYL-2-BUTANONE | 529 |
| DIISOBUTYL KETONE       | 530 |
| DIISOPROPYL KETONE      | 531 |
| 2-PYRROLIDONE           | 532 |
| N-METHYL-2-PYRROLIDONE  | 533 |
| 5-NONANONE              | 535 |
| 2-NONANONE              | 536 |
| ANTHRAQUINONE           | 537 |
| ACETYLACETONE           | 538 |
| ISOPHORONE              | 539 |
| CYCLOPENTANONE          | 540 |
| CYCLOHEXANONE           | 541 |
| 2-OCTANONE              | 542 |
| ACETOPHENONE            | 544 |
| beta-PROPIOLACTONE      | 545 |

---

|                            |     |
|----------------------------|-----|
| gamma-BUTYROLACTONE        | 546 |
| epsilon-CAPROLACTONE       | 547 |
| gamma-VALEROLACTONE        | 548 |
| ETHYL ISOPROPYL KETONE     | 549 |
| METHYL ISOPROPENYL KETONE  | 550 |
| 2-CYCLOHEXYL CYCLOHEXANONE | 551 |
| QUINONE                    | 552 |
| DIKETENE                   | 553 |
| METHANOL                   | 555 |
| ETHANOL                    | 556 |
| 1-PROPANOL                 | 557 |
| ISOPROPANOL                | 558 |
| 1-BUTANOL                  | 559 |
| 2-METHYL-1-PROPANOL        | 560 |
| 2-BUTANOL                  | 561 |
| 2-METHYL-2-PROPANOL        | 562 |
| 1-PENTANOL                 | 563 |
| 2-PENTANOL                 | 564 |
| 2-METHYL-2-BUTANOL         | 565 |
| 2-METHYL-1-BUTANOL         | 566 |
| 2,2-DIMETHYL-1-PROPANOL    | 567 |
| 1-HEXANOL                  | 568 |
| 2-HEXANOL                  | 569 |
| 3-HEXANOL                  | 570 |
| 2-METHYL-1-PENTANOL        | 571 |
| 3-METHYL-1-PENTANOL        | 572 |
| 3-METHYL-3-PENTANOL        | 573 |
| 3-PENTANOL                 | 574 |
| 2-ETHYL-1-HEXANOL          | 575 |
| 2-METHYL-1-HEXANOL         | 576 |
| 3-METHYL-1-BUTANOL         | 577 |
| 3-METHYL-2-BUTANOL         | 578 |
| 1-HEPTANOL                 | 579 |
| 2-HEPTANOL                 | 580 |
| 3-HEPTANOL                 | 581 |
| 5-METHYL-1-HEXANOL         | 582 |
| 4-METHYL-2-PENTANOL        | 583 |
| 1-OCTANOL                  | 585 |
| 2-OCTANOL                  | 586 |
| 1-NONANOL                  | 587 |
| 2-NONANOL                  | 588 |
| 1-DECANOL                  | 589 |
| 1-UNDECANOL                | 590 |
| 8-METHYL-1-NONANOL         | 591 |

---

|                            |     |
|----------------------------|-----|
| 1-DODECANOL                | 592 |
| 1-TRIDECANOL               | 593 |
| 1-TETRADECANOL             | 594 |
| 1-HEXADECANOL              | 596 |
| 1-HEPTADECANOL             | 597 |
| 1-OCTADECANOL              | 598 |
| 2-ETHYL-1-BUTANOL          | 599 |
| CYCLOHEXANOL               | 603 |
| 1-METHYLCYCLOHEXANOL       | 604 |
| cis-2-METHYLCYCLOHEXANOL   | 605 |
| trans-2-METHYLCYCLOHEXANOL | 606 |
| cis-3-METHYLCYCLOHEXANOL   | 607 |
| trans-3-METHYLCYCLOHEXANOL | 608 |
| cis-4-METHYLCYCLOHEXANOL   | 609 |
| L-MENTHOL                  | 611 |
| alpha-TERPINEOL            | 614 |
| TETRAHYDROFURFURYL ALCOHOL | 618 |
| ALLYL ALCOHOL              | 619 |
| 2-PHENYL-2-PROPANOL        | 620 |
| 2,3-XYLENOL                | 622 |
| 2,4-XYLENOL                | 624 |
| 2,5-XYLENOL                | 626 |
| 2,6-XYLENOL                | 628 |
| PROPARGYL ALCOHOL          | 631 |
| BENZYL ALCOHOL             | 632 |
| PHENOL                     | 633 |
| o-CRESOL                   | 634 |
| m-CRESOL                   | 635 |
| p-CRESOL                   | 636 |
| o-ETHYLPHENOL              | 637 |
| p-HYDROQUINONE             | 638 |
| p-ETHYLPHENOL              | 639 |
| p-tert-BUTYLPHENOL         | 640 |
| BISPHENOL A                | 641 |
| NONYLPHENOL                | 642 |
| ETHYLENE GLYCOL            | 643 |
| DIETHYLENE GLYCOL          | 644 |
| TRIETHYLENE GLYCOL         | 645 |
| TETRAETHYLENE GLYCOL       | 646 |
| 1,2-PROPYLENE GLYCOL       | 653 |
| 1,3-PROPYLENE GLYCOL       | 654 |
| DIPROPYLENE GLYCOL         | 655 |
| NEOPENTYL GLYCOL           | 656 |
| 2-BUTYNE-1,4-DIOL          | 657 |

---

|                                 |     |
|---------------------------------|-----|
| TRIPROPYLENE GLYCOL             | 658 |
| 2-METHYL-1,3-PROPANEDIOL        | 660 |
| 1,2-BUTANEDIOL                  | 661 |
| 1,3-BUTANEDIOL                  | 662 |
| HEXYLENE GLYCOL                 | 663 |
| GLYCEROL                        | 665 |
| p-tert-BUTYLCATECHOL            | 669 |
| 2,2,4-TRIMETHYL-1,3-PENTANEDIOL | 670 |
| 2-METHYL-1,3-PENTANEDIOL        | 671 |
| 2,3-BUTANEDIOL                  | 672 |
| cis-2-BUTENE-1,4-DIOL           | 673 |
| trans-2-BUTENE-1,4-DIOL         | 674 |
| 1,4-BUTANEDIOL                  | 675 |
| 1,5-PENTANEDIOL                 | 676 |
| 1,6-HEXANEDIOL                  | 677 |
| 1,2-BENZENEDIOL                 | 678 |
| 1,3-BENZENEDIOL                 | 679 |
| PENTAERYTHRITOL                 | 680 |
| TRIMETHYLOLPROPANE              | 681 |
| FORMIC ACID                     | 685 |
| ACETIC ACID                     | 686 |
| PROPIONIC ACID                  | 687 |
| n-DECANOIC ACID                 | 688 |
| n-BUTYRIC ACID                  | 690 |
| n-PENTANOIC ACID                | 692 |
| n-NONANOIC ACID                 | 693 |
| ISOBUTYRIC ACID                 | 694 |
| ISOVALERIC ACID                 | 695 |
| n-HEXANOIC ACID                 | 696 |
| 2-METHYLHEXANOIC ACID           | 697 |
| n-OCTANOIC ACID                 | 699 |
| CYCLOPENTYLACETIC ACID          | 701 |
| n-DODECANOIC ACID               | 703 |
| trans-CROTONIC ACID             | 708 |
| ACRYLIC ACID                    | 711 |
| METHACRYLIC ACID                | 712 |
| OLEIC ACID                      | 713 |
| BENZOIC ACID                    | 715 |
| SALICYLIC ACID                  | 718 |
| ADIPIIC ACID                    | 719 |
| PHTHALIC ACID                   | 721 |
| TEREPHTHALIC ACID               | 723 |
| PERACETIC ACID                  | 724 |
| ACETIC ANHYDRIDE                | 725 |

---

|                       |     |
|-----------------------|-----|
| PROPIONIC ANHYDRIDE   | 726 |
| BUTYRIC ANHYDRIDE     | 727 |
| GLUTARIC ANHYDRIDE    | 730 |
| PHTHALIC ANHYDRIDE    | 731 |
| MALEIC ANHYDRIDE      | 732 |
| TRIMELLITIC ANHYDRIDE | 733 |
| METHYL FORMATE        | 734 |
| ETHYL FORMATE         | 735 |
| n-PROPYL FORMATE      | 736 |
| n-BUTYL FORMATE       | 737 |
| ISOBUTYL FORMATE      | 738 |
| n-PENTYL FORMATE      | 739 |
| n-OCTYL FORMATE       | 740 |
| METHYL ACETATE        | 744 |
| ETHYL ACETATE         | 745 |
| n-PROPYL ACETATE      | 746 |
| n-BUTYL ACETATE       | 747 |
| ISOBUTYL ACETATE      | 748 |
| ISOPENTYL ACETATE     | 749 |
| ALLYL ACETATE         | 750 |
| ISOPROPYL ACETATE     | 751 |
| sec-BUTYL ACETATE     | 752 |
| VINYL ACETATE         | 753 |
| METHYL PROPIONATE     | 754 |
| ETHYL PROPIONATE      | 755 |
| n-PROPYL PROPIONATE   | 756 |
| n-BUTYL PROPIONATE    | 757 |
| n-PROPYL n-BUTYRATE   | 758 |
| VINYL PROPIONATE      | 759 |
| METHYL n-BUTYRATE     | 760 |
| ETHYL n-BUTYRATE      | 761 |
| ETHYL CAPRYLATE       | 763 |
| METHYL ACRYLATE       | 764 |
| ETHYL ACRYLATE        | 765 |
| n-BUTYL ACRYLATE      | 767 |
| ETHYL ISOVALERATE     | 770 |
| METHYL METHACRYLATE   | 771 |
| ETHYL METHACRYLATE    | 772 |
| DIOCTYL PHTHALATE     | 774 |
| DIISOCTYL PHTHALATE   | 775 |
| n-PENTYL ACETATE      | 777 |
| 2-ETHYLHEXYL ACETATE  | 778 |
| BENZYL ACETATE        | 779 |
| ISOBUTYL ISOBUTYRATE  | 780 |



---

|                                       |     |
|---------------------------------------|-----|
| ISOPENTYL ISOVALERATE                 | 781 |
| n-HEXYL ACETATE                       | 783 |
| BENZYL BENZOATE                       | 784 |
| n-BUTYL BENZOATE                      | 785 |
| ETHYLENE CARBONATE                    | 786 |
| n-HEPTYL ACETATE                      | 787 |
| n-OCTYL ACETATE                       | 788 |
| n-NONYL ACETATE                       | 789 |
| n-DECYL ACETATE                       | 790 |
| DIISODECYL PHTHALATE                  | 791 |
| METHYL SALICYLATE                     | 793 |
| DI-n-NONYL PHTHALATE                  | 794 |
| DIISOBUTYL PHTHALATE                  | 796 |
| DIMETHYL ISOPHTHALATE                 | 797 |
| DI-n-DECYL PHTHALATE                  | 798 |
| DI-n-HEXYL PHTHALATE                  | 800 |
| DIMETHYL TEREPHTHALATE                | 801 |
| n-BUTYL STEARATE                      | 803 |
| DIBUTYL SEBACATE                      | 804 |
| n-BUTYL n-BUTYRATE                    | 805 |
| 2-ETHYLHEXYL ACRYLATE                 | 806 |
| ETHYLENE GLYCOL DIACETATE             | 807 |
| ISOBUTYL METHACRYLATE                 | 808 |
| n-BUTYL METHACRYLATE                  | 809 |
| METHYL BENZOATE                       | 810 |
| ETHYL BENZOATE                        | 811 |
| DIETHYL CARBONATE                     | 812 |
| DIETHYL OXALATE                       | 813 |
| DIETHYL MALONATE                      | 814 |
| METHYL DECANOATE                      | 815 |
| ISOPROPYL MYRISTATE                   | 816 |
| DIMETHYL-1,4-CYCLOHEXANEDICARBOXYLATE | 817 |
| 2-METHYLTETRAHYDROFURAN               | 820 |
| DIMETHYL ETHER                        | 821 |
| DIETHYL ETHER                         | 822 |
| DIISOPROPYL ETHER                     | 823 |
| DI-n-BUTYL ETHER                      | 824 |
| METHYL tert-BUTYL ETHER               | 825 |
| DI-sec-BUTYL ETHER                    | 826 |
| METHYL ETHYL ETHER                    | 827 |
| DI-n-HEXYL ETHER                      | 832 |
| METHYL n-BUTYL ETHER                  | 833 |
| DIVINYL ETHER                         | 834 |
| ETHYL PROPYL ETHER                    | 835 |

---

|                                     |     |
|-------------------------------------|-----|
| ANETHOLE                            | 838 |
| 1,4-DIOXANE                         | 839 |
| TRIOXANE                            | 840 |
| DI-tert-BUTYL ETHER                 | 841 |
| DI-n-OCTYL ETHER                    | 842 |
| DI-n-PENTYL ETHER                   | 843 |
| METHYL sec-BUTYL ETHER              | 844 |
| METHYL tert-PENTYL ETHER            | 845 |
| tert-BUTYL ETHYL ETHER              | 846 |
| METHYLAL                            | 849 |
| ACETAL                              | 850 |
| TRIETHYL ORTHOFORMATE               | 854 |
| ETHYL HYDROPEROXIDE                 | 856 |
| 1,2-EPOXY-2-METHYLPROPANE           | 858 |
| ETHYLENE OXIDE                      | 859 |
| 1,2-PROPYLENE OXIDE                 | 860 |
| ETHYL VINYL ETHER                   | 862 |
| DI-n-PROPYL ETHER                   | 863 |
| BUTYL VINYL ETHER                   | 864 |
| n-BUTYL ETHYL ETHER                 | 865 |
| BIS(alpha-METHYLBENZYL) ETHER       | 866 |
| ALLYL ETHER                         | 870 |
| TRIETHYLENE GLYCOL DIMETHYL ETHER   | 871 |
| 1,2-DIMETHOXYETHANE                 | 872 |
| DIETHYLENE GLYCOL DIMETHYL ETHER    | 873 |
| TETRAETHYLENE GLYCOL DIMETHYL ETHER | 874 |
| DIETHYLENE GLYCOL DIETHYL ETHER     | 875 |
| DIETHYLENE GLYCOL DI-n-BUTYL ETHER  | 876 |
| ANISOLE                             | 878 |
| PHENETOLE                           | 879 |
| DIBENZYL ETHER                      | 880 |
| ALLYL GLYCIDYL ETHER                | 881 |
| DIPHENYL ETHER                      | 882 |
| 1,1-DIMETHOXYETHANE                 | 885 |
| METHYL VINYL ETHER                  | 887 |
| 1,2-EPOXYBUTANE                     | 888 |
| CUMENE HYDROPEROXIDE                | 889 |
| t-BUTYL HYDROPEROXIDE               | 890 |
| DICUMYL PEROXIDE                    | 892 |
| 2,5-DIHYDROFURAN                    | 894 |
| FURAN                               | 895 |
| TETRAHYDROFURAN                     | 896 |
| DIBENZOFURAN                        | 897 |
| DI-t-BUTYL PEROXIDE                 | 899 |

---

|                             |     |
|-----------------------------|-----|
| 2-METHYLBENZOFURAN          | 902 |
| 1,2-DIMETHOXYPROPANE        | 906 |
| 2-METHYL-1,3-DIOXOLANE      | 909 |
| 2,5-DIMETHYLTETRAHYDROFURAN | 910 |
| METHYL CHLORIDE             | 912 |
| ETHYL CHLORIDE              | 913 |
| VINYL CHLORIDE              | 914 |
| 1,4-DICHLORO-trans-2-BUTENE | 915 |
| 1,4-DICHLOROBUTANE          | 918 |
| 1,5-DICHLOROPENTANE         | 919 |
| 1,1-DICHLOROETHANE          | 924 |
| 1,2-DICHLOROETHANE          | 925 |
| 1,2-DICHLOROPROPANE         | 928 |
| ISOPROPYL CHLORIDE          | 932 |
| PROPARGYL CHLORIDE          | 933 |
| 1,2,3-TRICHLOROPROPANE      | 934 |
| ISOBUTYL CHLORIDE           | 935 |
| tert-BUTYL CHLORIDE         | 936 |
| 1,2-DICHLOROBUTANE          | 937 |
| 2,3-DICHLOROBUTANE          | 938 |
| TRICHLOROETHYLENE           | 939 |
| 3-CHLOROPROPENE             | 941 |
| CHLOROCYCLOHEXANE           | 942 |
| BENZYL CHLORIDE             | 944 |
| 3-CHLORO-o-XYLENE           | 945 |
| 4-CHLORO-o-XYLENE           | 946 |
| MONOCHLOROBENZENE           | 947 |
| o-DICHLOROBENZENE           | 948 |
| m-DICHLOROBENZENE           | 949 |
| p-DICHLOROBENZENE           | 950 |
| HEXACHLOROBENZENE           | 951 |
| o-CHLOROTOLUENE             | 953 |
| p-CHLOROTOLUENE             | 954 |
| 2,4-DICHLOROTOLUENE         | 955 |
| cis-1,2-DICHLOROETHYLENE    | 956 |
| trans-1,2-DICHLOROETHYLENE  | 957 |
| CHLOROPRENE                 | 959 |
| n-BUTYL CHLORIDE            | 961 |
| sec-BUTYL CHLORIDE          | 962 |
| 1-CHLOROPENTANE             | 963 |
| 1-CHLORONAPHTHALENE         | 964 |
| 1,1-DICHLOROETHYLENE        | 966 |
| 1,2,4-TRICHLOROBENZENE      | 967 |
| 1,4-DICHLORO-cis-2-BUTENE   | 968 |

---

|                           |      |
|---------------------------|------|
| 2-CHLOROPROPENE           | 970  |
| m-CHLOROBENZOYL CHLORIDE  | 971  |
| 3,4-DICHLORO-1-BUTENE     | 972  |
| (Z)-1,3-DICHLORO-2-BUTENE | 973  |
| BENZYL DICHLORIDE         | 974  |
| 1,3-DIFLUOROBENZENE       | 1004 |
| 1,2-DIFLUOROBENZENE       | 1005 |
| BROMOETHANE               | 1008 |
| 1-BROMOBUTANE             | 1015 |
| 1-BROMOHEPTANE            | 1016 |
| m-DIBROMOBENZENE          | 1019 |
| BROMOBENZENE              | 1021 |
| n-PROPYL IODIDE           | 1024 |
| ISOPROPYL IODIDE          | 1025 |
| 1,4-DIFLUOROBENZENE       | 1026 |
| IODOBENZENE               | 1027 |
| METHYLAMINE               | 1036 |
| DIMETHYLAMINE             | 1037 |
| TRIMETHYLAMINE            | 1038 |
| 2-METHYL-2-AMINOBTANE     | 1040 |
| TRIETHYLAMINE             | 1041 |
| DI-n-PROPYLAMINE          | 1042 |
| N,N-DIMETHYL-n-BUTYLAMINE | 1043 |
| N,N-DIETHYLMETHYLAMINE    | 1044 |
| DIETHYLAMINE              | 1045 |
| n-PROPYLAMINE             | 1046 |
| n-BUTYLAMINE              | 1047 |
| n-PENTYLAMINE             | 1048 |
| ISOBUTYLAMINE             | 1049 |
| CYCLOPROPYLAMINE          | 1050 |
| HYDRAZINE                 | 1051 |
| DIISOBUTYLAMINE           | 1052 |
| ISOPROPYLAMINE            | 1053 |
| PYRROLE                   | 1055 |
| METHYL DIETHANOLAMINE     | 1056 |
| MONOETHANOLAMINE          | 1057 |
| DIETHANOLAMINE            | 1058 |
| TRIETHANOLAMINE           | 1059 |
| sec-BUTYLAMINE            | 1060 |
| tert-BUTYLAMINE           | 1061 |
| CYCLOHEXYLAMINE           | 1062 |
| DEHYDROABIETYLAMINE       | 1063 |
| HEXAMETHYLENEDIAMINE      | 1064 |
| BENZYLAMINE               | 1066 |

---

|                         |      |
|-------------------------|------|
| TRIETHYLENEDIAMINE      | 1067 |
| o-TOLUIDINE             | 1069 |
| m-TOLUIDINE             | 1070 |
| p-TOLUIDINE             | 1071 |
| TRIETHYLENETETRAMINE    | 1072 |
| ALLYLAMINE              | 1073 |
| ETHYLENEDIAMINE         | 1074 |
| ETHYLENEIMINE           | 1075 |
| DIISOPROPYLAMINE        | 1076 |
| DI-n-BUTYLAMINE         | 1077 |
| PIPERIDINE              | 1078 |
| p-AMINODIPHENYLAMINE    | 1080 |
| QUINOLINE               | 1081 |
| N-AMINOETHYL PIPERAZINE | 1083 |
| HEXAMETHYLENETETRAMINE  | 1084 |
| 1,2-PROPANEDIAMINE      | 1085 |
| N,N-DIETHYLANILINE      | 1086 |
| N-METHYLPYRROLE         | 1087 |
| PYRAZINE                | 1088 |
| DIPHENYLAMINE           | 1089 |
| PHENYLHYDRAZINE         | 1090 |
| QUINALDINE              | 1092 |
| NITROMETHANE            | 1093 |
| NITROETHANE             | 1094 |
| 1-NITROPROPANE          | 1095 |
| 2-NITROPROPANE          | 1096 |
| HYDRACRYLONITRILE       | 1097 |
| MORPHOLINE              | 1098 |
| PYRROLIDINE             | 1099 |
| N-METHYLPYRROLIDINE     | 1100 |
| 1-NITROBUTANE           | 1102 |
| HYDROGEN CYANIDE        | 1103 |
| ACETONITRILE            | 1104 |
| PROPIONITRILE           | 1105 |
| ACRYLONITRILE           | 1106 |
| METHACRYLONITRILE       | 1107 |
| SUCCINONITRILE          | 1108 |
| ADIPONITRILE            | 1109 |
| o-NITROTOLUENE          | 1110 |
| p-NITROTOLUENE          | 1111 |
| m-NITROTOLUENE          | 1112 |
| BUTYRONITRILE           | 1114 |
| VALERONITRILE           | 1115 |
| MALONONITRILE           | 1116 |

---

|                          |      |
|--------------------------|------|
| HEXANENITRILE            | 1117 |
| ISOBUTYRONITRILE         | 1118 |
| BENZONITRILE             | 1120 |
| PYRIDINE                 | 1121 |
| ANILINE                  | 1122 |
| 2,4-TOLUENE DIISOCYANATE | 1123 |
| HEXAMETHYLENEIMINE       | 1124 |
| N-METHYLANILINE          | 1125 |
| N,N-DIMETHYLANILINE      | 1126 |
| 2-METHYLPYRIDINE         | 1127 |
| cis-CROTONITRILE         | 1128 |
| METHYL MERCAPTAN         | 1130 |
| n-PROPYL MERCAPTAN       | 1132 |
| tert-BUTYL MERCAPTAN     | 1133 |
| ISOBUTYL MERCAPTAN       | 1134 |
| sec-BUTYL MERCAPTAN      | 1135 |
| n-HEXYL MERCAPTAN        | 1136 |
| n-NONYL MERCAPTAN        | 1137 |
| n-OCTYL MERCAPTAN        | 1138 |
| ISOPROPYL MERCAPTAN      | 1139 |
| CYCLOHEXYL MERCAPTAN     | 1140 |
| BENZYL MERCAPTAN         | 1141 |
| METHYL ETHYL SULFIDE     | 1142 |
| METHYL t-BUTYL SULFIDE   | 1144 |
| DI-n-PROPYL SULFIDE      | 1146 |
| DIETHYL SULFIDE          | 1147 |
| DIMETHYL SULFIDE         | 1149 |
| THIOPHENE                | 1150 |
| BENZOTHIOPHENE           | 1151 |
| DIETHYL DISULFIDE        | 1153 |
| n-DECYL MERCAPTAN        | 1155 |
| n-PENTYL MERCAPTAN       | 1156 |
| DIMETHYL DISULFIDE       | 1157 |
| DI-n-PROPYL DISULFIDE    | 1158 |
| n-DODECYL MERCAPTAN      | 1166 |
| tert-OCTYL MERCAPTAN     | 1167 |
| n-HEPTYL MERCAPTAN       | 1168 |
| DIALLYL SULFIDE          | 1169 |
| n-BUTYL MERCAPTAN        | 1170 |
| PHENYL MERCAPTAN         | 1171 |
| TETRAHYDROTHIOPHENE      | 1172 |
| DIMETHYL SULFOXIDE       | 1173 |
| SULFOLANE                | 1174 |
| DI-n-PROPYL SULFONE      | 1176 |

---

|                                             |      |
|---------------------------------------------|------|
| DI-n-BUTYL SULFONE                          | 1177 |
| ACETYL CHLORIDE                             | 1179 |
| CHLOROACETIC ACID                           | 1180 |
| DICHLOROACETYL CHLORIDE                     | 1182 |
| BENZOYL CHLORIDE                            | 1184 |
| p-CHLOROBENZOTRIFLUORIDE                    | 1185 |
| 2,4-DICHLOROBENZOTRIFLUORIDE                | 1186 |
| o-CHLOROANILINE                             | 1187 |
| FLUOROBENZENE                               | 1188 |
| CHLOROMETHYL METHYL ETHER                   | 1189 |
| 3-CHLORO-1,2-PROPANEDIOL                    | 1190 |
| 1,3-DICHLORO-2-PROPANOL                     | 1191 |
| HEXAFLUOROBENZENE                           | 1192 |
| DI(2-CHLOROETHYL)ETHER                      | 1194 |
| 3-(METHYLMERCAPTO)PROPANAL                  | 1196 |
| 3-MERCAPTOPROPIONIC ACID                    | 1201 |
| N,N-DIMETHYLFORMAMIDE                       | 1204 |
| epsilon-CAPROLACTAM                         | 1208 |
| alpha-EPICHLOROHYDRIN                       | 1209 |
| ACETONE CYANOHYDRIN                         | 1210 |
| TRI-n-BUTYL BORATE                          | 1211 |
| TRIPHENYLPHOSPHINE                          | 1212 |
| HEXAMETHYL PHOSPHORAMIDE                    | 1213 |
| NITROBENZENE                                | 1214 |
| ACETALDOL                                   | 1216 |
| FURFURAL                                    | 1217 |
| PROPYLENE GLYCOL MONOMETHYL ETHER ACETATE   | 1224 |
| DIPROPYLENE GLYCOL MONOMETHYL ETHER ACETATE | 1225 |
| METHOXYDIHYDROPYRAN                         | 1226 |
| CARBON DISULFIDE                            | 1252 |
| HEXAMETHYLDISILAZANE                        | 1262 |
| HEXAMETHYLDISILOXANE                        | 1263 |
| HEXAMETHYLCYCLOTTRISILOXANE                 | 1264 |
| DODECAMETHYLPENTASILOXANE                   | 1267 |
| METHYL VINYL DICHLOROSILANE                 | 1269 |
| 3-(TRIMETHOXYSILYL)-1-PROPANETHIOL          | 1273 |
| TETRAMETHYLSILANE                           | 1278 |
| OCTAMETHYLCYCLOTETRASILOXANE                | 1281 |
| 3-OCTANONE                                  | 1295 |
| 3-NONANONE                                  | 1297 |
| 2-CYCLOHEXENE-1-ONE                         | 1300 |
| 2,6-DIMETHYLOCTANE                          | 1305 |
| 2,7-DIMETHYLOCTANE                          | 1306 |
| m-ETHYLPHENOL                               | 1307 |

---

|                            |      |
|----------------------------|------|
| 2,6-DI-tert-BUTYL-p-CRESOL | 1308 |
| 2-PHENYLETHANOL            | 1309 |
| 2,6-DIMETHYL-4-HEPTANOL    | 1310 |
| 1-PHENYL-1-PROPANOL        | 1311 |
| 1-PHENYL-2-PROPANOL        | 1312 |
| 2-PHENYL-1-PROPANOL        | 1313 |
| 3-PHENYL-1-PROPANOL        | 1314 |
| alpha-METHYLBENZYL ALCOHOL | 1316 |
| o-TOLUALCOHOL              | 1318 |
| m-TOLUALCOHOL              | 1319 |
| p-tert-AMYLPHENOL          | 1321 |
| p-CUMYLPHENOL              | 1322 |
| 2,4-PENTANEDIOL            | 1324 |
| 3-METHYL-trans-2-PENTENE   | 1325 |
| 5-METHYL-1-HEXENE          | 1326 |
| 1,4-CYCLOHEXANEDIMETHANOL  | 1328 |
| 2-METHYL-1-OCTENE          | 1330 |
| 2-METHYL-1-HEPTENE         | 1331 |
| NEOPENTANOIC ACID          | 1337 |
| 2-ETHYL HEXANOIC ACID      | 1339 |
| n-HEPTANOIC ACID           | 1340 |
| NEOHEXANOIC ACID           | 1341 |
| 2-ETHYL BUTYRIC ACID       | 1355 |
| METHYL MALEIC ANHYDRIDE    | 1362 |
| tert-BUTYL FORMATE         | 1364 |
| n-HEXYL FORMATE            | 1365 |
| 1,2-HEXADIENE              | 1367 |
| CYCLOHEXYL FORMATE         | 1368 |
| tert-BUTYL ACETATE         | 1369 |
| METHYL ISOBUTYRATE         | 1370 |
| ETHYL ISOBUTYRATE          | 1371 |
| BENZYL FORMATE             | 1373 |
| ALLYL METHACRYLATE         | 1375 |
| CYCLOHEXYL ACETATE         | 1377 |
| PROPYLENE CARBONATE        | 1378 |
| GLYCERYL TRIACETATE        | 1379 |
| DIETHYL PHTHALATE          | 1382 |
| DI-n-BUTYL PHTHALATE       | 1383 |
| DIMETHYL PHTHALATE         | 1384 |
| DIETHYL SUCCINATE          | 1385 |
| DIHEXYL ADIPATE            | 1386 |
| ETHYLIDENE DIACETATE       | 1387 |
| DIALLYL MALEATE            | 1388 |
| DIBUTYL MALEATE            | 1389 |



---

|                            |      |
|----------------------------|------|
| ISOBUTYL ACRYLATE          | 1390 |
| DIETHYL MALEATE            | 1392 |
| DIMETHYL MALEATE           | 1393 |
| VINYL PIVALATE             | 1396 |
| DIMETHYL CARBONATE         | 1397 |
| n-PROPYL BENZOATE          | 1398 |
| DIISOBUTYL ETHER           | 1399 |
| 1-HEPTYNE                  | 1400 |
| 1,3-DIOXANE                | 1403 |
| ETHYLAL                    | 1404 |
| 1,2-DIETHOXYETHANE         | 1405 |
| 2,3-DIHYDROFURAN           | 1406 |
| 1,1-DICHLOROPROPANE        | 1408 |
| 1,3-DICHLOROPROPANE        | 1409 |
| 2,3-DICHLOROPROPENE        | 1410 |
| 1,2,3-TRICHLOROBENZENE     | 1415 |
| 1,3,5-TRICHLOROBENZENE     | 1416 |
| BENZOTRIFLUORIDE           | 1430 |
| 2-BROMOBUTANE              | 1432 |
| p-BROMOTOLUENE             | 1452 |
| n-HEXYL IODIDE             | 1453 |
| n-BUTYL IODIDE             | 1454 |
| CHLOROTRIFLUOROETHYLENE    | 1459 |
| n-HEXYLAMINE               | 1465 |
| n-HEPTYLAMINE              | 1466 |
| n-OCTYLAMINE               | 1467 |
| n-NONYLAMINE               | 1468 |
| n-DECYLAMINE               | 1469 |
| n-DODECYLAMINE             | 1470 |
| N-ETHYL-2-METHYLALLYLAMINE | 1471 |
| PENTAETHYLENE HEXAMINE     | 1472 |
| TRIALLYLAMINE              | 1473 |
| TRI-n-BUTYLAMINE           | 1474 |
| DIETHYLENETRIAMINE         | 1475 |
| TETRAETHYLENEPENTAMINE     | 1476 |
| TRIPROPYLAMINE             | 1477 |
| VINYLAACETONITRILE         | 1478 |
| n-BUTYL ISOCYANATE         | 1480 |
| CYCLOHEXYL ISOCYANATE      | 1481 |
| o-ETHYLANILINE             | 1482 |
| o-PHENYLENEDIAMINE         | 1483 |
| PROPYLENEIMINE             | 1484 |
| m-PHENYLENEDIAMINE         | 1485 |
| CYCLOPENTYLAMINE           | 1487 |

---

|                                   |      |
|-----------------------------------|------|
| DICYCLOHEXYLAMINE                 | 1488 |
| N-METHYLCYCLOHEXYLAMINE           | 1489 |
| N-AMINOETHYL ETHANOLAMINE         | 1490 |
| DIPHENYLMETHANE-4,4'-DIISOCYANATE | 1494 |
| N,N'-DIPHENYL-p-PHENYLENEDIAMINE  | 1495 |
| DIALLYLAMINE                      | 1497 |
| m-DINITROBENZENE                  | 1498 |
| o-DINITROBENZENE                  | 1499 |
| 2,4-DINITROTOLUENE                | 1501 |
| 3,4-DINITROTOLUENE                | 1503 |
| p-PHENYLENEDIAMINE                | 1508 |
| PHENYL ISOCYANATE                 | 1509 |
| PIPERAZINE                        | 1510 |
| PYRIDAZINE                        | 1511 |
| PYRIMIDINE                        | 1512 |
| PYRAZOLE                          | 1513 |
| o-NITROANILINE                    | 1520 |
| p-NITROANILINE                    | 1521 |
| m-NITROANILINE                    | 1522 |
| ISOQUINOLINE                      | 1525 |
| p-AMINODIPHENYL                   | 1527 |
| NICOTINONITRILE                   | 1530 |
| 2,6-DIETHYLANILINE                | 1531 |
| METHYL ISOCYANATE                 | 1532 |
| 2,4,6-TRIMETHYLPYRIDINE           | 1534 |
| 2,6-DIMETHYLPYRIDINE              | 1535 |
| 3-METHYLPYRIDINE                  | 1536 |
| METHYLGLUTARONITRILE              | 1537 |
| 4-METHYLPYRIDINE                  | 1538 |
| 1,6-HEXAMETHYLENE DIISOCYANATE    | 1539 |
| ISOPHORONE DIISOCYANATE           | 1540 |
| THIACYCLOPROPANE                  | 1541 |
| METHYL n-BUTYL SULFIDE            | 1542 |
| ETHYL t-BUTYL SULFIDE             | 1543 |
| TRIMETHYLENE SULFIDE              | 1544 |
| tert-DODECYL MERCAPTAN            | 1546 |
| tert-NONYL MERCAPTAN              | 1547 |
| 2-METHYLTHIOPHENE                 | 1548 |
| 3-METHYLTHIOPHENE                 | 1549 |
| CAMPHOR                           | 1550 |
| FORMAMIDE                         | 1551 |
| N-METHYLFORMAMIDE                 | 1552 |
| DIACETONE ALCOHOL                 | 1554 |
| FURFURYL ALCOHOL                  | 1555 |

---

|                                               |      |
|-----------------------------------------------|------|
| N,N-DIMETHYLACETAMIDE                         | 1556 |
| p-METHOXYPHENOL                               | 1559 |
| 2-METHOXYETHANOL                              | 1560 |
| 2-ETHOXYETHANOL                               | 1561 |
| 2-BUTOXYETHANOL                               | 1562 |
| 2-(2-METHOXYETHOXY)ETHANOL                    | 1563 |
| 2-(2-ETHOXYETHOXY)ETHANOL                     | 1564 |
| 2-AMINOETHOXYETHANOL                          | 1565 |
| ETHYLCHLOROACETATE                            | 1566 |
| ACETALDOXIME                                  | 1567 |
| TRIETHYLENE GLYCOL MONOMETHYL ETHER           | 1569 |
| 2-HYDROXYETHYL METHACRYLATE                   | 1573 |
| METHYL LACTATE                                | 1575 |
| 2-METHOXY PROPANOL-1                          | 1576 |
| m-CHLORONITROBENZENE                          | 1582 |
| 2-HYDROXYACETOPHENONE                         | 1583 |
| 4-HYDROXYACETOPHENONE                         | 1584 |
| p-PHENETIDINE                                 | 1587 |
| ACETOL                                        | 1589 |
| o-CHLOROPHENOL                                | 1591 |
| m-CHLOROPHENOL                                | 1592 |
| p-CHLOROPHENOL                                | 1593 |
| PENTAFLUOROPHENOL                             | 1594 |
| 1-ISOPROPOXY-2-PROPANOL                       | 1595 |
| 2-CHLOROETHANOL                               | 1596 |
| ISOPHTHALOYL CHLORIDE                         | 1597 |
| OCTAMETHYLTRISILOXANE                         | 1630 |
| OCTADECAMETHYLOCTASILOXANE                    | 1631 |
| TETRAETHYL SILANE                             | 1632 |
| HEXADECAMETHYLHEPTASILOXANE                   | 1633 |
| DIAMYL KETONE                                 | 1637 |
| DIACETYL                                      | 1638 |
| 1-CYCLOHEXYLETHANONE                          | 1640 |
| 3-METHYLCYCLOPENTANONE                        | 1642 |
| THYMOL                                        | 1649 |
| 1,2,3,6-TETRAHYDROBENZYL ALCOHOL              | 1652 |
| 7-METHYL-1-OCTENE                             | 1656 |
| CYCLOPROPANE CARBOXYLIC ACID                  | 1668 |
| ISOBUTYRIC ANHYDRIDE                          | 1672 |
| 2,2,4-TRIMETHYL-1,3-PENTANEDIOL DIISOBUTYRATE | 1673 |
| ETHYL TRIMETHYL ACETATE                       | 1676 |
| DI(2-ETHYLHEXYL)TEREPHTHALATE                 | 1677 |
| ALLYL ACRYLATE                                | 1679 |
| DIALLYL PHTHALATE                             | 1680 |

---

|                                   |      |
|-----------------------------------|------|
| METHYL STEARATE                   | 1681 |
| ETHYL PHENYL ACETATE              | 1684 |
| n-PENTYL n-BUTYRATE               | 1689 |
| ISOPENTYL BUTYRATE                | 1690 |
| ALLYLIDENE DIACETATE              | 1691 |
| METHYL CAPRYLATE                  | 1697 |
| ISOPROPYL PALMITATE               | 1699 |
| ETHYL CAPRATE                     | 1700 |
| ETHYL MYRISTATE                   | 1702 |
| DIMETHYL GLUTARATE                | 1716 |
| DIMETHYL SUCCINATE                | 1718 |
| DIOCTYL ADIPATE                   | 1719 |
| DI(2-ETHYLHEXYL)ADIPATE           | 1720 |
| DIMETHYLMALONATE                  | 1722 |
| 1,3,5-TRIETHYLBENZENE             | 1723 |
| 1-BROMODODECANE                   | 1724 |
| 1,4-BIS(3-AMINOPROPYL)PIPERAZINE  | 1733 |
| CYCLOPROPYL CYANIDE               | 1735 |
| 1,5-PENTANEDIAMINE                | 1739 |
| 2,4-DIMETHYLANILINE               | 1741 |
| 3-(N,N-DIMETHYLAMINO) PROPYLAMINE | 1744 |
| 1-n-PENTYLNAPHTHALENE             | 1747 |
| 8-METHYLQUINOLINE                 | 1748 |
| TRI-n-OCTYLAMINE                  | 1749 |
| 2-BUTOXIME                        | 1750 |
| N-METHYLPYPERIDINE                | 1751 |
| IMIDAZOLE                         | 1752 |
| DIAMYLAMINE                       | 1753 |
| TRIAMYLAMINE                      | 1754 |
| UNDECYLAMINE                      | 1755 |
| TETRYL                            | 1758 |
| DI-n-OCTYLAMINE                   | 1759 |
| DI-2-ETHYLHEXYLAMINE              | 1760 |
| TETRAMETHYLETHYLENEDIAMINE        | 1761 |
| 1,3-PROPANEDIAMINE                | 1763 |
| N-ETHYLANILINE                    | 1768 |
| DI-tert-BUTYL DISULFIDE           | 1770 |
| DI-tert-BUTYL SULFIDE             | 1771 |
| 2-METHYLTHIACYCLOPENTANE          | 1772 |
| 2-ETHYLTHIOPHENE                  | 1779 |
| 2,5-DIMETHYLTHIOPHENE             | 1781 |
| ETHYL PROPYL DISULFIDE            | 1783 |
| METHYL PHENYL SULFIDE             | 1784 |
| DI-n-BUTYL SULFIDE                | 1785 |

---

|                                              |      |
|----------------------------------------------|------|
| ETHYL PROPYL SULFIDE                         | 1790 |
| DIISOPROPYL SULFIDE                          | 1796 |
| DI-n-BUTYL DISULFIDE                         | 1802 |
| ETHYLENE GLYCOL 2-ETHYLHEXYL ETHER           | 1803 |
| DICHLOROACETIC ACID                          | 1806 |
| PROPYLENE GLYCOL MONOMETHYL ETHER            | 1807 |
| DIPROPYLENE GLYCOL MONOMETHYL ETHER          | 1808 |
| PROPYLENE GLYCOL 1-tert-BUTYL ETHER          | 1809 |
| TRIPROPYLENE GLYCOL MONOMETHYL ETHER         | 1810 |
| p-CHLOROANILINE                              | 1813 |
| TRIETHYLENE GLYCOL n-BUTYL ETHER             | 1814 |
| TRIETHYLENE GLYCOL MONOETHYL ETHER           | 1815 |
| 2,3-EPOXY-1-PROPANOL                         | 1817 |
| 2-HEXOXYETHANOL                              | 1818 |
| 2-(2-HEXOXYETHOXY)ETHANOL                    | 1819 |
| MONOOLEIN                                    | 1820 |
| DIPROPYLENE GLYCOL n-PROPYL ETHER            | 1821 |
| PROPYLENE GLYCOL n-PROPYL ETHER              | 1822 |
| DIETHYLENE GLYCOL MONOBUTYL ETHER ACETATE    | 1823 |
| PHENYLACETONITRILE                           | 1827 |
| N,N-DIETHYLHYDROXYLAMINE                     | 1828 |
| DIETHYLSULFITE                               | 1836 |
| 1-ETHOXY-2-PROPANOL                          | 1846 |
| METHANESULFONYL CHLORIDE                     | 1850 |
| tert-BUTYL METHACRYLATE                      | 1851 |
| gamma-AMINOPROPYLTRIETHOXY SILANE            | 1860 |
| METHYL DICHLOROSILANE                        | 1866 |
| METHYL TRICHLOROSILANE                       | 1867 |
| VINYLTRICHLOROSILANE                         | 1868 |
| TRIS(2-METHOXYETHOXY)VINYLSILANE             | 1870 |
| METHYL SILICATE                              | 1871 |
| 3-CHLOROPROPYLTRIMETHOXY SILANE              | 1872 |
| [3-(2,3- EPOXYPROXY)PROPYL]TRIMETHOXY SILANE | 1877 |
| METHYLTRIACETOXY SILANE                      | 1879 |
| TRIETHYL ESTER PHOSPHOROUS ACID              | 1883 |
| DIMETHYLCHLOROSILANE                         | 1903 |
| TRIMETHYLCHLOROSILANE                        | 1904 |
| DIMETHYLDICHLOROSILANE                       | 1905 |
| DECAMETHYLCYCLOPENTASILOXANE                 | 1906 |
| ETHYLTRICHLOROSILANE                         | 1909 |
| DICHLORODIETHYLSILANE                        | 1910 |
| DIGLYCOLIC ACID                              | 1917 |
| LEVULINIC ACID                               | 1918 |
| GUAIACOL                                     | 1920 |

---

|                                       |      |
|---------------------------------------|------|
| ETHYLENE GLYCOL MONOPROPYL ETHER      | 1921 |
| 2-(2-BUTOXYETHOXY)ETHANOL             | 1922 |
| 4-CHLORO-3-NITROBENZOTRIFLUORIDE      | 1924 |
| 3,4-DICHLOROPHENYL ISOCYANATE         | 1925 |
| 3-NITROBENZOTRIFLUORIDE               | 1928 |
| p-TOLUENESULFONIC ACID                | 1929 |
| CHLOROACETALDEHYDE                    | 1932 |
| DICHLOROACETALDEHYDE                  | 1933 |
| 1-CHLORO-2,4-DINITROBENZENE           | 1934 |
| p-DIMETHYLAMINOBENZALDEHYDE           | 1935 |
| ETHYL CHLOROFORMATE                   | 1936 |
| METHYL CHLOROFORMATE                  | 1939 |
| 3,4-DICHLOROANILINE                   | 1941 |
| 1,2-DICHLORO-4-NITROBENZENE           | 1942 |
| DEXTROSE                              | 1943 |
| o-CHLORONITROBENZENE                  | 1944 |
| p-CHLORONITROBENZENE                  | 1945 |
| TRIETHYL PHOSPHATE                    | 1946 |
| CYCLOHEXANONE OXIME                   | 1949 |
| TRIMETHOXSILANE                       | 1952 |
| DIMETHYLDIMETHOXSILANE                | 1953 |
| PHENYLTRICHLOROSILANE                 | 1954 |
| PHENYLMETHYLDICHLOROSILANE            | 1955 |
| TETRADECAMETHYLHEXASILOXANE           | 1958 |
| DECAMETHYLTETRAASILOXANE              | 1959 |
| PYRUVIC ACID                          | 1960 |
| TRI-o-CRESYL PHOSPHATE                | 1961 |
| TRIPHENYL PHOSPHATE                   | 1962 |
| ETHYL ALUMINUM SESQUICHLORIDE         | 1963 |
| 3-AMINO-1-PROPANOL                    | 1968 |
| 1-AMINO-2-PROPANOL                    | 1969 |
| METHYL CHLOROACETATE                  | 1970 |
| ETHYL THIOLACETATE                    | 1971 |
| ACETOACETANILIDE                      | 1972 |
| OXAZOLE                               | 1973 |
| ACETANILIDE                           | 1974 |
| LACTONITRILE                          | 1976 |
| DIMETHYL SULFATE                      | 1978 |
| DIETHYL SULFATE                       | 1979 |
| TARTARIC ACID                         | 1985 |
| ETHYL LACTATE                         | 1987 |
| 2-ETHOXYETHYL ACETATE                 | 1988 |
| DIETHYLENE GLYCOL ETHYL ETHER ACETATE | 1989 |
| METHYL ACETOACETATE                   | 1990 |

---

|                                         |      |
|-----------------------------------------|------|
| ETHYL ACETOACETATE                      | 1991 |
| METHYL CYANOACETATE                     | 1992 |
| ETHYL CYANOACETATE                      | 1993 |
| 3-METHOXYPROPIONITRILE                  | 1994 |
| ISOXAZOLE                               | 1995 |
| TEREPHTHALOYL CHLORIDE                  | 1998 |
| 1-CHLORO-2-PROPANOL                     | 2001 |
| PROPANESULFONYL CHLORIDE                | 2003 |
| ETHANESULFONYL CHLORIDE                 | 2004 |
| tert-BUTYLFORMAMIDE                     | 2005 |
| N-METHYLACETAMIDE                       | 2007 |
| THIODIGLYCOL                            | 2008 |
| DIMERCAPTOETHYL ETHER                   | 2010 |
| 2-MERCAPTOETHANOL                       | 2011 |
| ETHYLTHIOETHANOL                        | 2012 |
| 1,2-ETHANEDITHIOL                       | 2013 |
| DIETHYLETHANOLAMINE                     | 2014 |
| METHYLETHANOLAMINE                      | 2015 |
| DIMETHYLETHANOLAMINE                    | 2016 |
| DIISOPROPANOLAMINE                      | 2017 |
| N-(2-HYDROXYETHYL)PIPERAZINE            | 2019 |
| 3-METHOXYISOPROPYLAMINE                 | 2020 |
| ETHYLENE GLYCOL MONOBUTYL ETHER ACETATE | 2021 |
| 2-HYDROXYETHYL ACRYLATE                 | 2023 |
| 2-HYDROXYPROPYL METHACRYLATE            | 2024 |
| ETHYL-3-ETHOXYPROPIONATE                | 2025 |
| 2-HYDROXYPROPYL ACRYLATE                | 2027 |
| DI-(2-CHLOROETHOXY)METHANE              | 2028 |
| 1-METHYLVINYL ACETATE                   | 2030 |
| 2-PENTOXYETHANOL                        | 2031 |
| 1-CHLORO-3-PROPANOL                     | 2032 |
| METHOXYACETONE                          | 2034 |
| METHYL para-TOLUATE                     | 2041 |
| PHENYL ACETATE                          | 2042 |
| PROPYLENE GLYCOL n-BUTYL ETHER          | 2044 |
| DIPROPYLENE GLYCOL n-BUTYL ETHER        | 2045 |
| TRIMETHYL BORATE                        | 2049 |
| t-BUTYL ACETOACETATE                    | 2050 |
| 4-(2-AMINOETHYL)MORPHOLINE              | 2056 |
| N-ETHYLMORPHOLINE                       | 2057 |
| METHYL-3-MERCAPTOPROPIONATE             | 2060 |
| ETHYL LEVULINATE                        | 2064 |
| 4-(2-HYDROXYETHYL)MORPHOLINE            | 2067 |
| ACETOIN                                 | 2071 |

|                                 |      |
|---------------------------------|------|
| 1,3-DIMETHYL-2-IMIDAZOLIDINONE  | 2073 |
| N-ETHYL-2-PYRROLIDONE           | 2074 |
| TRI-n-BUTYL PHOSPHATE           | 2077 |
| 5-(HYDROXYMETHYL) FURFURAL      | 2078 |
| 2-AMINO-2-METHYL-1-PROPANOL     | 2082 |
| METHYL alpha-HYDROXYISOBUTYRATE | 2091 |
| 4-METHYLGUAIACOL                | 2106 |
| THIOACETIC-ACID                 | 2118 |
| 3-BROMO-1-PROPENE               | 2120 |
| 3-iodo-1-PROPENE                | 2121 |
| 1-BROMOPENTANE                  | 2133 |
| 2-CHLORO-2-METHYLBUTANE         | 2135 |

97

98

**Table S3.** The compounds correlated in the QSPR modeling for AIT

| Name                       | Index |
|----------------------------|-------|
| METHANE                    | 0     |
| ETHANE                     | 1     |
| PROPANE                    | 2     |
| ISOBUTANE                  | 3     |
| n-BUTANE                   | 4     |
| n-PENTANE                  | 6     |
| ISOPENTANE                 | 7     |
| NEOPENTANE                 | 8     |
| n-HEXANE                   | 9     |
| 2-METHYLPENTANE            | 10    |
| 3-METHYLPENTANE            | 11    |
| 2,2-DIMETHYLBUTANE         | 12    |
| 2,3-DIMETHYLBUTANE         | 13    |
| n-HEPTANE                  | 14    |
| 2-METHYLHEXANE             | 15    |
| 3-METHYLHEXANE             | 16    |
| 2,3-DIMETHYLPENTANE        | 19    |
| 2,2,3-TRIMETHYLBUTANE      | 22    |
| n-OCTANE                   | 23    |
| 2-METHYL-3-ETHYLPENTANE    | 34    |
| 2,2,3-TRIMETHYLPENTANE     | 36    |
| 2,2,4-TRIMETHYLPENTANE     | 37    |
| 2,3,3-TRIMETHYLPENTANE     | 38    |
| n-NONANE                   | 41    |
| 3,3-DIETHYLPENTANE         | 45    |
| 2,2,3,3-TETRAMETHYLPENTANE | 46    |
| 2,3,3,4-TETRAMETHYLPENTANE | 49    |
| n-DECANE                   | 51    |



---

|                                  |     |
|----------------------------------|-----|
| n-DODECANE                       | 57  |
| n-TETRADECANE                    | 59  |
| n-HEXADECANE                     | 61  |
| 2-METHYLNONANE                   | 77  |
| 2-METHYLOCTANE                   | 81  |
| 3-METHYLOCTANE                   | 82  |
| 4-METHYLOCTANE                   | 83  |
| CYCLOPROPANE                     | 90  |
| CYCLOPENTANE                     | 92  |
| METHYLCYCLOPENTANE               | 93  |
| ETHYLCYCLOPENTANE                | 94  |
| n-PROPYLCYCLOPENTANE             | 100 |
| n-BUTYLCYCLOPENTANE              | 107 |
| CYCLOHEXANE                      | 115 |
| METHYLCYCLOHEXANE                | 116 |
| ETHYLCYCLOHEXANE                 | 117 |
| cis-1,2-DIMETHYLCYCLOHEXANE      | 119 |
| trans-1,2-DIMETHYLCYCLOHEXANE    | 120 |
| cis-1,3-DIMETHYLCYCLOHEXANE      | 121 |
| trans-1,3-DIMETHYLCYCLOHEXANE    | 122 |
| cis-1,4-DIMETHYLCYCLOHEXANE      | 123 |
| trans-1,4-DIMETHYLCYCLOHEXANE    | 124 |
| 1-trans-3,5-TRIMETHYLCYCLOHEXANE | 125 |
| n-PROPYLCYCLOHEXANE              | 126 |
| ISOPROPYLCYCLOHEXANE             | 127 |
| n-BUTYLCYCLOHEXANE               | 129 |
| cis-DECAHYDRONAPHTHALENE         | 130 |
| trans-DECAHYDRONAPHTHALENE       | 131 |
| BICYCLOHEXYL                     | 132 |
| 2,4-DIMETHYL-3-ETHYLPENTANE      | 145 |
| ETHYLENE                         | 146 |
| PROPYLENE                        | 147 |
| 1-BUTENE                         | 149 |
| cis-2-BUTENE                     | 150 |
| trans-2-BUTENE                   | 151 |
| ISOBUTENE                        | 152 |
| 1-PENTENE                        | 154 |
| cis-2-PENTENE                    | 155 |
| trans-2-PENTENE                  | 156 |
| 2-METHYL-1-BUTENE                | 157 |
| 2-METHYL-2-BUTENE                | 159 |
| 1-HEXENE                         | 161 |
| cis-2-HEXENE                     | 162 |
| trans-2-HEXENE                   | 163 |

---

|                           |     |
|---------------------------|-----|
| 2-METHYL-1-PENTENE        | 166 |
| 4-METHYL-1-PENTENE        | 168 |
| 2-ETHYL-1-BUTENE          | 174 |
| 2,3-DIMETHYL-1-BUTENE     | 175 |
| 2,3-DIMETHYL-2-BUTENE     | 177 |
| 1-HEPTENE                 | 179 |
| 2,3,3-TRIMETHYL-1-BUTENE  | 193 |
| 1-OCTENE                  | 195 |
| 2,4,4-TRIMETHYL-1-PENTENE | 197 |
| 2,4,4-TRIMETHYL-2-PENTENE | 198 |
| 1-DECENE                  | 201 |
| 1-DODECENE                | 203 |
| 1-TETRADECENE             | 205 |
| 1-HEXADECENE              | 207 |
| 1-OCTADECENE              | 208 |
| CYCLOPENTENE              | 210 |
| CYCLOHEXENE               | 211 |
| VINYLCYCLOHEXENE          | 224 |
| d-LIMONENE                | 229 |
| 1,3-BUTADIENE             | 238 |
| ISOPRENE                  | 244 |
| METHYLCYCLOPENTADIENE     | 247 |
| CYCLOPENTADIENE           | 250 |
| DICYCLOPENTADIENE         | 251 |
| 3-METHYL-1,4-PENTADIENE   | 256 |
| ACETYLENE                 | 267 |
| METHYLACETYLENE           | 268 |
| BENZENE                   | 286 |
| TOLUENE                   | 287 |
| ETHYLBENZENE              | 289 |
| o-XYLENE                  | 290 |
| m-XYLENE                  | 291 |
| p-XYLENE                  | 292 |
| n-PROPYLBENZENE           | 294 |
| CUMENE                    | 295 |
| o-ETHYLTOLUENE            | 296 |
| m-ETHYLTOLUENE            | 297 |
| p-ETHYLTOLUENE            | 298 |
| 1,2,3-TRIMETHYLBENZENE    | 299 |
| 1,2,4-TRIMETHYLBENZENE    | 300 |
| MESITYLENE                | 301 |
| n-BUTYLBENZENE            | 303 |
| ISOBUTYLBENZENE           | 304 |
| sec-BUTYLBENZENE          | 305 |

---

|                               |     |
|-------------------------------|-----|
| tert-BUTYLBENZENE             | 306 |
| p-CYMENE                      | 309 |
| o-DIETHYLBENZENE              | 310 |
| m-DIETHYLBENZENE              | 311 |
| p-DIETHYLBENZENE              | 312 |
| m-DIISOPROPYLBENZENE          | 327 |
| p-DIISOPROPYLBENZENE          | 328 |
| BIPHENYL                      | 338 |
| p-TERPHENYL                   | 339 |
| m-TERPHENYL                   | 340 |
| o-TERPHENYL                   | 341 |
| 1,1-DIPHENYLETHANE            | 342 |
| DIPHENYLMETHANE               | 343 |
| 1,2-DIPHENYLETHANE            | 344 |
| STYRENE                       | 378 |
| p-METHYLSTYRENE               | 385 |
| alpha-METHYLSTYRENE           | 386 |
| NAPHTHALENE                   | 395 |
| 1-METHYLNAPHTHALENE           | 396 |
| 1-ETHYLNAPHTHALENE            | 398 |
| 1,2,3,4-TETRAHYDRONAPHTHALENE | 399 |
| ANTHRACENE                    | 424 |
| 2-NORBORNENE                  | 441 |
| alpha-PINENE                  | 456 |
| FORMALDEHYDE                  | 474 |
| ACETALDEHYDE                  | 475 |
| PROPANAL                      | 476 |
| BUTANAL                       | 478 |
| 2-METHYLPROPANAL              | 479 |
| PENTANAL                      | 480 |
| HEPTANAL                      | 481 |
| HEXANAL                       | 482 |
| OCTANAL                       | 483 |
| NONANAL                       | 484 |
| 2-ETHYLHEXANAL                | 486 |
| ACROLEIN                      | 499 |
| trans-CROTONALDEHYDE          | 501 |
| BENZALDEHYDE                  | 506 |
| PARALDEHYDE                   | 513 |
| ACETONE                       | 514 |
| METHYL ETHYL KETONE           | 515 |
| 3-PENTANONE                   | 516 |
| METHYL ISOBUTYL KETONE        | 517 |
| 2-PENTANONE                   | 523 |

---

|                            |     |
|----------------------------|-----|
| 2-HEXANONE                 | 525 |
| 2-HEPTANONE                | 526 |
| 5-METHYL-2-HEXANONE        | 527 |
| MESITYL OXIDE              | 528 |
| DIISOBUTYL KETONE          | 530 |
| N-METHYL-2-PYRROLIDONE     | 533 |
| ACETYLACETONE              | 538 |
| ISOPHORONE                 | 539 |
| CYCLOHEXANONE              | 541 |
| ACETOPHENONE               | 544 |
| epsilon-CAPROLACTONE       | 547 |
| DIKETENE                   | 553 |
| METHANOL                   | 555 |
| ETHANOL                    | 556 |
| 1-PROPANOL                 | 557 |
| ISOPROPANOL                | 558 |
| 1-BUTANOL                  | 559 |
| 2-METHYL-1-PROPANOL        | 560 |
| 2-BUTANOL                  | 561 |
| 2-METHYL-2-PROPANOL        | 562 |
| 1-PENTANOL                 | 563 |
| 2-PENTANOL                 | 564 |
| 2-METHYL-2-BUTANOL         | 565 |
| 2-METHYL-1-BUTANOL         | 566 |
| 1-HEXANOL                  | 568 |
| 2-METHYL-1-PENTANOL        | 571 |
| 3-PENTANOL                 | 574 |
| 2-ETHYL-1-HEXANOL          | 575 |
| 3-METHYL-1-BUTANOL         | 577 |
| 1-DECANOL                  | 589 |
| 1-DODECANOL                | 592 |
| CYCLOHEXANOL               | 603 |
| 1-METHYLCYCLOHEXANOL       | 604 |
| cis-2-METHYLCYCLOHEXANOL   | 605 |
| trans-2-METHYLCYCLOHEXANOL | 606 |
| cis-4-METHYLCYCLOHEXANOL   | 609 |
| trans-4-METHYLCYCLOHEXANOL | 610 |
| TETRAHYDROFURFURYL ALCOHOL | 618 |
| ALLYL ALCOHOL              | 619 |
| PROPARGYL ALCOHOL          | 631 |
| BENZYL ALCOHOL             | 632 |
| PHENOL                     | 633 |
| o-CRESOL                   | 634 |
| m-CRESOL                   | 635 |

---

|                                 |     |
|---------------------------------|-----|
| p-CRESOL                        | 636 |
| p-HYDROQUINONE                  | 638 |
| ETHYLENE GLYCOL                 | 643 |
| DIETHYLENE GLYCOL               | 644 |
| TRIETHYLENE GLYCOL              | 645 |
| 1,2-PROPYLENE GLYCOL            | 653 |
| NEOPENTYL GLYCOL                | 656 |
| 1,3-BUTANEDIOL                  | 662 |
| GLYCEROL                        | 665 |
| 2,2,4-TRIMETHYL-1,3-PENTANEDIOL | 670 |
| 1,5-PENTANEDIOL                 | 676 |
| 1,3-BENZENEDIOL                 | 679 |
| FORMIC ACID                     | 685 |
| ACETIC ACID                     | 686 |
| PROPIONIC ACID                  | 687 |
| n-BUTYRIC ACID                  | 690 |
| n-PENTANOIC ACID                | 692 |
| n-NONANOIC ACID                 | 693 |
| ISOBUTYRIC ACID                 | 694 |
| ISOVALERIC ACID                 | 695 |
| n-HEXANOIC ACID                 | 696 |
| trans-CROTONIC ACID             | 708 |
| ACRYLIC ACID                    | 711 |
| METHACRYLIC ACID                | 712 |
| OLEIC ACID                      | 713 |
| BENZOIC ACID                    | 715 |
| SALICYLIC ACID                  | 718 |
| ADIPIC ACID                     | 719 |
| ACETIC ANHYDRIDE                | 725 |
| PROPIONIC ANHYDRIDE             | 726 |
| BUTYRIC ANHYDRIDE               | 727 |
| PHTHALIC ANHYDRIDE              | 731 |
| MALEIC ANHYDRIDE                | 732 |
| METHYL FORMATE                  | 734 |
| ETHYL FORMATE                   | 735 |
| n-PROPYL FORMATE                | 736 |
| n-BUTYL FORMATE                 | 737 |
| ISOBUTYL FORMATE                | 738 |
| METHYL ACETATE                  | 744 |
| ETHYL ACETATE                   | 745 |
| n-PROPYL ACETATE                | 746 |
| n-BUTYL ACETATE                 | 747 |
| ISOBUTYL ACETATE                | 748 |
| ISOPENTYL ACETATE               | 749 |

---

|                           |     |
|---------------------------|-----|
| ALLYL ACETATE             | 750 |
| ISOPROPYL ACETATE         | 751 |
| VINYL ACETATE             | 753 |
| METHYL PROPIONATE         | 754 |
| ETHYL PROPIONATE          | 755 |
| n-BUTYL PROPIONATE        | 757 |
| ETHYL n-BUTYRATE          | 761 |
| METHYL ACRYLATE           | 764 |
| ETHYL ACRYLATE            | 765 |
| n-BUTYL ACRYLATE          | 767 |
| DIOCTYL PHTHALATE         | 774 |
| n-PENTYL ACETATE          | 777 |
| BENZYL ACETATE            | 779 |
| ISOBUTYL ISOBUTYRATE      | 780 |
| BENZYL BENZOATE           | 784 |
| n-BUTYL BENZOATE          | 785 |
| DIISODECYL PHTHALATE      | 791 |
| METHYL SALICYLATE         | 793 |
| DIISOBUTYL PHTHALATE      | 796 |
| DIMETHYL TEREPHTHALATE    | 801 |
| n-BUTYL STEARATE          | 803 |
| DIBUTYL SEBACATE          | 804 |
| 2-ETHYLHEXYL ACRYLATE     | 806 |
| ETHYLENE GLYCOL DIACETATE | 807 |
| ISOBUTYL METHACRYLATE     | 808 |
| n-BUTYL METHACRYLATE      | 809 |
| METHYL BENZOATE           | 810 |
| ETHYL BENZOATE            | 811 |
| DIMETHYL ETHER            | 821 |
| DIETHYL ETHER             | 822 |
| DIISOPROPYL ETHER         | 823 |
| DI-n-BUTYL ETHER          | 824 |
| METHYL tert-BUTYL ETHER   | 825 |
| METHYL ETHYL ETHER        | 827 |
| DI-n-HEXYL ETHER          | 832 |
| DIVINYL ETHER             | 834 |
| 1,4-DIOXANE               | 839 |
| TRIOXANE                  | 840 |
| DI-n-OCTYL ETHER          | 842 |
| DI-n-PENTYL ETHER         | 843 |
| METHYL n-PENTYL ETHER     | 847 |
| METHYLAL                  | 849 |
| ACETAL                    | 850 |
| ETHYLENE OXIDE            | 859 |

---

|                                    |      |
|------------------------------------|------|
| 1,2-PROPYLENE OXIDE                | 860  |
| ETHYL VINYL ETHER                  | 862  |
| DI-n-PROPYL ETHER                  | 863  |
| BUTYL VINYL ETHER                  | 864  |
| TRIETHYLENE GLYCOL DIMETHYL ETHER  | 871  |
| 1,2-DIMETHOXYETHANE                | 872  |
| DIETHYLENE GLYCOL DIMETHYL ETHER   | 873  |
| DIETHYLENE GLYCOL DIETHYL ETHER    | 875  |
| DIETHYLENE GLYCOL DI-n-BUTYL ETHER | 876  |
| DIPHENYL ETHER                     | 882  |
| METHYL VINYL ETHER                 | 887  |
| 1,2-EPOXYBUTANE                    | 888  |
| CUMENE HYDROPEROXIDE               | 889  |
| TETRAHYDROFURAN                    | 896  |
| BENZOYL PEROXIDE                   | 898  |
| METHYL CHLORIDE                    | 912  |
| ETHYL CHLORIDE                     | 913  |
| VINYL CHLORIDE                     | 914  |
| DICHLOROMETHANE                    | 921  |
| 1,1-DICHLOROETHANE                 | 924  |
| 1,2-DICHLOROETHANE                 | 925  |
| 1,1,2-TRICHLOROETHANE              | 926  |
| 1,2-DICHLOROPROPANE                | 928  |
| 1,1,1-TRICHLOROETHANE              | 929  |
| ISOPROPYL CHLORIDE                 | 932  |
| 1,2,3-TRICHLOROPROPANE             | 934  |
| TRICHLOROETHYLENE                  | 939  |
| 3-CHLOROPROPENE                    | 941  |
| HEXACHLORO-1,3-BUTADIENE           | 943  |
| BENZYL CHLORIDE                    | 944  |
| MONOCHLOROBENZENE                  | 947  |
| o-DICHLOROBENZENE                  | 948  |
| cis-1,2-DICHLOROETHYLENE           | 956  |
| trans-1,2-DICHLOROETHYLENE         | 957  |
| CHLOROPRENE                        | 959  |
| PROPYL CHLORIDE                    | 960  |
| n-BUTYL CHLORIDE                   | 961  |
| 1-CHLOROPENTANE                    | 963  |
| 1,1-DICHLOROETHYLENE               | 966  |
| 1,2,4-TRICHLOROBENZENE             | 967  |
| CHLORODIFLUOROMETHANE              | 979  |
| 1,1-DIFLUOROETHYLENE               | 1000 |
| TETRAFLUROETHYLENE                 | 1001 |
| BROMOMETHANE                       | 1007 |

---

|                          |      |
|--------------------------|------|
| BROMOETHANE              | 1008 |
| 1,1,2,2-TETRABROMOETHANE | 1010 |
| 1-BROMOPROPANE           | 1011 |
| 1-BROMOBUTANE            | 1015 |
| BROMOBENZENE             | 1021 |
| DICHLOROFLUOROMETHANE    | 1031 |
| METHYLAMINE              | 1036 |
| DIMETHYLAMINE            | 1037 |
| TRIMETHYLAMINE           | 1038 |
| ETHYLAMINE               | 1039 |
| TRIETHYLAMINE            | 1041 |
| DI-n-PROPYLAMINE         | 1042 |
| DIETHYLAMINE             | 1045 |
| n-PROPYLAMINE            | 1046 |
| n-BUTYLAMINE             | 1047 |
| ISOBUTYLAMINE            | 1049 |
| ISOPROPYLAMINE           | 1053 |
| DIETHANOLAMINE           | 1058 |
| CYCLOHEXYLAMINE          | 1062 |
| DEHYDROABIETYLAMINE      | 1063 |
| o-TOLUIDINE              | 1069 |
| m-TOLUIDINE              | 1070 |
| p-TOLUIDINE              | 1071 |
| TRIETHYLENETETRAMINE     | 1072 |
| ALLYLAMINE               | 1073 |
| ETHYLENEDIAMINE          | 1074 |
| ETHYLENEIMINE            | 1075 |
| DIISOPROPYLAMINE         | 1076 |
| QUINOLINE                | 1081 |
| N,N-DIETHYLANILINE       | 1086 |
| N-METHYLPYRROLE          | 1087 |
| DIPHENYLAMINE            | 1089 |
| PHENYLHYDRAZINE          | 1090 |
| NITROMETHANE             | 1093 |
| NITROETHANE              | 1094 |
| 1-NITROPROPANE           | 1095 |
| 2-NITROPROPANE           | 1096 |
| HYDRACRYLONITRILE        | 1097 |
| MORPHOLINE               | 1098 |
| HYDROGEN CYANIDE         | 1103 |
| ACETONITRILE             | 1104 |
| ACRYLONITRILE            | 1106 |
| ADIPONITRILE             | 1109 |
| o-NITROTOLUENE           | 1110 |



---

|                                           |      |
|-------------------------------------------|------|
| p-NITROTOLUENE                            | 1111 |
| BUTYRONITRILE                             | 1114 |
| PYRIDINE                                  | 1121 |
| ANILINE                                   | 1122 |
| HEXAMETHYLENEIMINE                        | 1124 |
| N,N-DIMETHYLANILINE                       | 1126 |
| 2-METHYLPYRIDINE                          | 1127 |
| ETHYL MERCAPTAN                           | 1131 |
| DIMETHYL SULFIDE                          | 1149 |
| DIMETHYL SULFOXIDE                        | 1173 |
| ACETYL CHLORIDE                           | 1179 |
| BENZOYL CHLORIDE                          | 1184 |
| DI(2-CHLOROETHYL)ETHER                    | 1194 |
| 3-(METHYLMERCAPTO)PROPANAL                | 1196 |
| N,N-DIMETHYLFORMAMIDE                     | 1204 |
| epsilon-CAPROLACTAM                       | 1208 |
| alpha-EPOCHLOROHYDRIN                     | 1209 |
| ACETONE CYANOHYDRIN                       | 1210 |
| NITROBENZENE                              | 1214 |
| ACETALDOL                                 | 1216 |
| FURFURAL                                  | 1217 |
| PROPYLENE GLYCOL MONOMETHYL ETHER ACETATE | 1224 |
| CARBON DISULFIDE                          | 1252 |
| HEXAMETHYLDISILOXANE                      | 1263 |
| DODECAMETHYLPENTASILOXANE                 | 1267 |
| METHYL VINYL DICHLOROSILANE               | 1269 |
| TETRAMETHYLSILANE                         | 1278 |
| OCTAMETHYLCYCLOTETRASILOXANE              | 1281 |
| 2,3-DIMETHYLOCTANE                        | 1302 |
| alpha-METHYLBENZYL ALCOHOL                | 1316 |
| 1,4-CYCLOHEXANEDIMETHANOL                 | 1328 |
| 2-ETHYL HEXANOIC ACID                     | 1339 |
| n-HEPTANOIC ACID                          | 1340 |
| FUMARIC ACID                              | 1347 |
| 2-ETHYL BUTYRIC ACID                      | 1355 |
| CYCLOHEXYL ACETATE                        | 1377 |
| GLYCERYL TRIACETATE                       | 1379 |
| DIETHYL PHTHALATE                         | 1382 |
| DI-n-BUTYL PHTHALATE                      | 1383 |
| DIMETHYL PHTHALATE                        | 1384 |
| ISOBUTYL ACRYLATE                         | 1390 |
| DIETHYL MALEATE                           | 1392 |
| 1,3-DIOXANE                               | 1403 |
| 1,2-DIETHOXYETHANE                        | 1405 |

---

|                                           |      |
|-------------------------------------------|------|
| 2,3-DIHYDROFURAN                          | 1406 |
| VINYL BROMIDE                             | 1462 |
| 1-CHLORO-1,1-DIFLUOROETHANE               | 1463 |
| VINYL FLUORIDE                            | 1464 |
| n-OCTYLAMINE                              | 1467 |
| DIETHYLENETRIAMINE                        | 1475 |
| TETRAETHYLENEPENTAMINE                    | 1476 |
| CYCLOPENTYLAMINE                          | 1487 |
| N-AMINOETHYL ETHANOLAMINE                 | 1490 |
| PIPERAZINE                                | 1510 |
| NITROGLYCERINE                            | 1519 |
| o-NITROANILINE                            | 1520 |
| p-AMINODIPHENYL                           | 1527 |
| METHYL ISOCYANATE                         | 1532 |
| 3-METHYLPYRIDINE                          | 1536 |
| 4-METHYLPYRIDINE                          | 1538 |
| CAMPHOR                                   | 1550 |
| DIACETONE ALCOHOL                         | 1554 |
| FURFURYL ALCOHOL                          | 1555 |
| N,N-DIMETHYLACETAMIDE                     | 1556 |
| p-METHOXYPHENOL                           | 1559 |
| 2-METHOXYETHANOL                          | 1560 |
| 2-ETHOXYETHANOL                           | 1561 |
| 2-BUTOXYETHANOL                           | 1562 |
| 2-(2-METHOXYETHOXY)ETHANOL                | 1563 |
| 2-(2-ETHOXYETHOXY)ETHANOL                 | 1564 |
| METHYL LACTATE                            | 1575 |
| 2-CHLOROETHANOL                           | 1596 |
| 4-FORMYLMORPHOLINE                        | 1598 |
| OCTAMETHYLTRISILOXANE                     | 1630 |
| TETRAETHYL SILANE                         | 1632 |
| 2,3-EPOXY-1-PROPANOL                      | 1817 |
| DIETHYLENE GLYCOL MONOBUTYL ETHER ACETATE | 1823 |
| METHYL DICHLOROSILANE                     | 1866 |
| VINYLTRICHLOROSILANE                      | 1868 |
| TETRAETHYL LEAD                           | 1889 |
| METHYL SILANE                             | 1900 |
| DIMETHYL SILANE                           | 1901 |
| TRIMETHYL SILANE                          | 1902 |
| TRIMETHYLCHLOROSILANE                     | 1904 |
| DECAMETHYLCYCLOPENTASILOXANE              | 1906 |
| DIGLYCOLIC ACID                           | 1917 |
| ETHYLENE GLYCOL MONOPROPYL ETHER          | 1921 |
| 2-(2-BUTOXYETHOXY)ETHANOL                 | 1922 |

---

|                                         |      |
|-----------------------------------------|------|
| 1-CHLORO-2,4-DINITROBENZENE             | 1934 |
| ETHYL CHLOROFORMATE                     | 1936 |
| METHYL CHLOROFORMATE                    | 1939 |
| 3,4-DICHLOROANILINE                     | 1941 |
| TRIETHYL PHOSPHATE                      | 1946 |
| DIMETHYLDIMETHOXSILANE                  | 1953 |
| TETRADECAMETHYLHEXASILOXANE             | 1958 |
| DECAMETHYLTETRASILOXANE                 | 1959 |
| TRI- <i>o</i> -CRESYL PHOSPHATE         | 1961 |
| 1-AMINO-2-PROPANOL                      | 1969 |
| ACETOACETANILIDE                        | 1972 |
| ACETANILIDE                             | 1974 |
| DIMETHYL SULFATE                        | 1978 |
| DIETHYL SULFATE                         | 1979 |
| CITRIC ACID                             | 1983 |
| TARTARIC ACID                           | 1985 |
| ETHYL LACTATE                           | 1987 |
| 2-ETHOXYETHYL ACETATE                   | 1988 |
| DIETHYLENE GLYCOL ETHYL ETHER ACETATE   | 1989 |
| METHYL ACETOACETATE                     | 1990 |
| ETHYL ACETOACETATE                      | 1991 |
| ETHYL HYDROGEN SULFATE                  | 1997 |
| 2-MERCAPTOETHANOL                       | 2011 |
| METHYLETHANOLAMINE                      | 2015 |
| DIMETHYLETHANOLAMINE                    | 2016 |
| DIISOPROPANOLAMINE                      | 2017 |
| ETHYLENE GLYCOL MONOBUTYL ETHER ACETATE | 2021 |
| ETHYL-3-ETHOXYPROPIONATE                | 2025 |
| DL-2,3-butanediol                       | 2274 |
| 2-ethylbutanoic acid                    | 2275 |
| tetrakis(trimethylsilyloxy)silane       | 2276 |
| 2-methylbiphenyl                        | 2277 |
| tributylin                              | 2278 |
| butyl citrate                           | 2279 |
| 4-octylphenyl salicylate                | 2280 |

---

99

100

**Table S4.** The compounds correlated in the QSPR modeling for LFL

---

| Name      | Index |
|-----------|-------|
| METHANE   | 0     |
| PROPANE   | 2     |
| ISOBUTANE | 3     |
| n-BUTANE  | 4     |
| n-PENTANE | 6     |

---

|                            |     |
|----------------------------|-----|
| ISOPENTANE                 | 7   |
| NEOPENTANE                 | 8   |
| n-HEXANE                   | 9   |
| 2-METHYLPENTANE            | 10  |
| 3-METHYLPENTANE            | 11  |
| 2,2-DIMETHYLBUTANE         | 12  |
| 2,3-DIMETHYLBUTANE         | 13  |
| n-HEPTANE                  | 14  |
| 2-METHYLHEXANE             | 15  |
| 2,3-DIMETHYLPENTANE        | 19  |
| 2,2,3-TRIMETHYLBUTANE      | 22  |
| n-OCTANE                   | 23  |
| 2,2,4-TRIMETHYLPENTANE     | 37  |
| n-NONANE                   | 41  |
| 3,3-DIETHYLPENTANE         | 45  |
| 2,2,3,3-TETRAMETHYLPENTANE | 46  |
| n-DECANE                   | 51  |
| n-DODECANE                 | 57  |
| n-TRIDECANE                | 58  |
| n-TETRADECANE              | 59  |
| CYCLOPROPANE               | 90  |
| CYCLOBUTANE                | 91  |
| ETHYLCYCLOPENTANE          | 94  |
| n-PROPYLCYCLOPENTANE       | 100 |
| CYCLOHEXANE                | 115 |
| METHYLCYCLOHEXANE          | 116 |
| ETHYLCYCLOHEXANE           | 117 |
| cis-DECAHYDRONAPHTHALENE   | 130 |
| trans-DECAHYDRONAPHTHALENE | 131 |
| BICYCLOHEXYL               | 132 |
| 1,1-DIETHYLCYCLOHEXANE     | 133 |
| CYCLOHEPTANE               | 135 |
| PROPYLENE                  | 147 |
| 1-BUTENE                   | 149 |
| cis-2-BUTENE               | 150 |
| trans-2-BUTENE             | 151 |
| ISOBUTENE                  | 152 |
| 1-PENTENE                  | 154 |
| 2-METHYL-1-BUTENE          | 157 |
| 2-METHYL-2-BUTENE          | 159 |
| 1-HEXENE                   | 161 |
| 1-HEPTENE                  | 179 |
| trans-2-HEPTENE            | 181 |
| 1-OCTENE                   | 195 |

---

|                               |     |
|-------------------------------|-----|
| trans-2-OCTENE                | 196 |
| 2,4,4-TRIMETHYL-1-PENTENE     | 197 |
| 1-DECENE                      | 201 |
| 1-DODECENE                    | 203 |
| CYCLOHEXENE                   | 211 |
| VINYLCYCLOHEXENE              | 224 |
| d-LIMONENE                    | 229 |
| 1,3-BUTADIENE                 | 238 |
| ISOPRENE                      | 244 |
| METHYLCYCLOPENTADIENE         | 247 |
| 1,4-HEXADIENE                 | 248 |
| DICYCLOPENTADIENE             | 251 |
| METHYLACETYLENE               | 268 |
| DIMETHYLACETYLENE             | 270 |
| 1-HEXYNE                      | 276 |
| VINYLACETYLENE                | 279 |
| BENZENE                       | 286 |
| TOLUENE                       | 287 |
| ETHYLBENZENE                  | 289 |
| o-XYLENE                      | 290 |
| m-XYLENE                      | 291 |
| p-XYLENE                      | 292 |
| n-PROPYLBENZENE               | 294 |
| CUMENE                        | 295 |
| 1,2,3-TRIMETHYLBENZENE        | 299 |
| MESITYLENE                    | 301 |
| n-BUTYLBENZENE                | 303 |
| ISOBUTYLBENZENE               | 304 |
| sec-BUTYLBENZENE              | 305 |
| tert-BUTYLBENZENE             | 306 |
| p-CYMENE                      | 309 |
| p-DIETHYLBENZENE              | 312 |
| BIPHENYL                      | 338 |
| STYRENE                       | 378 |
| m-METHYLSTYRENE               | 380 |
| 5-o-TOLYL-2-PENTENE           | 381 |
| p-METHYLSTYRENE               | 385 |
| alpha-METHYLSTYRENE           | 386 |
| m-DIVINYLBENZENE              | 387 |
| NAPHTHALENE                   | 395 |
| 1-METHYLNAPHTHALENE           | 396 |
| 1,2,3,4-TETRAHYDRONAPHTHALENE | 399 |
| ANTHRACENE                    | 424 |
| VINYLNORBORNENE               | 431 |

---

|                           |     |
|---------------------------|-----|
| sec-BUTYLCYCLOHEXANE      | 445 |
| alpha-PINENE              | 456 |
| ACETALDEHYDE              | 475 |
| PROPANAL                  | 476 |
| BUTANAL                   | 478 |
| 2-METHYLPROPANAL          | 479 |
| 2-ETHYLHEXANAL            | 486 |
| ACROLEIN                  | 499 |
| cis-CROTONALDEHYDE        | 500 |
| trans-CROTONALDEHYDE      | 501 |
| METHACROLEIN              | 502 |
| BENZALDEHYDE              | 506 |
| PARALDEHYDE               | 513 |
| ACETONE                   | 514 |
| METHYL ETHYL KETONE       | 515 |
| 3-PENTANONE               | 516 |
| METHYL ISOBUTYL KETONE    | 517 |
| 2-PENTANONE               | 523 |
| METHYL ISOPROPYL KETONE   | 524 |
| 2-HEPTANONE               | 526 |
| 5-METHYL-2-HEXANONE       | 527 |
| MESITYL OXIDE             | 528 |
| DIISOBUTYL KETONE         | 530 |
| N-METHYL-2-PYRROLIDONE    | 533 |
| 2-NONANONE                | 536 |
| CYCLOHEXANONE             | 541 |
| ACETOPHENONE              | 544 |
| beta-PROPIOLACTONE        | 545 |
| gamma-BUTYROLACTONE       | 546 |
| METHYL ISOPROPENYL KETONE | 550 |
| DIKETENE                  | 553 |
| METHANOL                  | 555 |
| ETHANOL                   | 556 |
| 1-PROPANOL                | 557 |
| ISOPROPANOL               | 558 |
| 1-BUTANOL                 | 559 |
| 2-METHYL-1-PROPANOL       | 560 |
| 2-BUTANOL                 | 561 |
| 2-METHYL-2-PROPANOL       | 562 |
| 1-PENTANOL                | 563 |
| 2-PENTANOL                | 564 |
| 2-METHYL-1-BUTANOL        | 566 |
| 1-HEXANOL                 | 568 |
| 2-METHYL-1-PENTANOL       | 571 |

---

|                            |     |
|----------------------------|-----|
| 3-PENTANOL                 | 574 |
| 2-ETHYL-1-HEXANOL          | 575 |
| 3-METHYL-1-BUTANOL         | 577 |
| 3-METHYL-2-BUTANOL         | 578 |
| 4-METHYL-2-PENTANOL        | 583 |
| 1-OCTANOL                  | 585 |
| 1-NONANOL                  | 587 |
| 1-DECANOL                  | 589 |
| 2-ETHYL-1-BUTANOL          | 599 |
| CYCLOHEXANOL               | 603 |
| 1-METHYLCYCLOHEXANOL       | 604 |
| alpha-TERPINEOL            | 614 |
| TETRAHYDROFURFURYL ALCOHOL | 618 |
| ALLYL ALCOHOL              | 619 |
| 2,6-XYLENOL                | 628 |
| PROPARGYL ALCOHOL          | 631 |
| o-CRESOL                   | 634 |
| m-CRESOL                   | 635 |
| p-CRESOL                   | 636 |
| ETHYLENE GLYCOL            | 643 |
| DIETHYLENE GLYCOL          | 644 |
| TRIETHYLENE GLYCOL         | 645 |
| 1,2-PROPYLENE GLYCOL       | 653 |
| 1,3-PROPYLENE GLYCOL       | 654 |
| DIPROPYLENE GLYCOL         | 655 |
| NEOPENTYL GLYCOL           | 656 |
| 2-BUTYNE-1,4-DIOL          | 657 |
| 2-METHYL-1,3-PROPANEDIOL   | 660 |
| 1,3-BUTANEDIOL             | 662 |
| HEXYLENE GLYCOL            | 663 |
| GLYCEROL                   | 665 |
| cis-2-BUTENE-1,4-DIOL      | 673 |
| trans-2-BUTENE-1,4-DIOL    | 674 |
| 1,4-BUTANEDIOL             | 675 |
| 1,3-BENZENEDIOL            | 679 |
| FORMIC ACID                | 685 |
| ACETIC ACID                | 686 |
| PROPIONIC ACID             | 687 |
| n-BUTYRIC ACID             | 690 |
| n-PENTANOIC ACID           | 692 |
| ISOBUTYRIC ACID            | 694 |
| ISOVALERIC ACID            | 695 |
| trans-CROTONIC ACID        | 708 |
| ACRYLIC ACID               | 711 |

---

|                       |     |
|-----------------------|-----|
| METHACRYLIC ACID      | 712 |
| ADIPIC ACID           | 719 |
| ACETIC ANHYDRIDE      | 725 |
| PROPIONIC ANHYDRIDE   | 726 |
| BUTYRIC ANHYDRIDE     | 727 |
| PHTHALIC ANHYDRIDE    | 731 |
| METHYL FORMATE        | 734 |
| ETHYL FORMATE         | 735 |
| n-PROPYL FORMATE      | 736 |
| n-BUTYL FORMATE       | 737 |
| ISOBUTYL FORMATE      | 738 |
| n-OCTYL FORMATE       | 740 |
| METHYL ACETATE        | 744 |
| n-PROPYL ACETATE      | 746 |
| n-BUTYL ACETATE       | 747 |
| ISOBUTYL ACETATE      | 748 |
| ISOPENTYL ACETATE     | 749 |
| ALLYL ACETATE         | 750 |
| VINYL ACETATE         | 753 |
| METHYL PROPIONATE     | 754 |
| ETHYL PROPIONATE      | 755 |
| METHYL ACRYLATE       | 764 |
| ETHYL ACRYLATE        | 765 |
| n-BUTYL ACRYLATE      | 767 |
| METHYL METHACRYLATE   | 771 |
| ETHYL METHACRYLATE    | 772 |
| DIOCTYL PHTHALATE     | 774 |
| DIISOCTYL PHTHALATE   | 775 |
| n-PENTYL ACETATE      | 777 |
| 2-ETHYLHEXYL ACETATE  | 778 |
| ISOBUTYL ISOBUTYRATE  | 780 |
| n-HEXYL ACETATE       | 783 |
| BENZYL BENZOATE       | 784 |
| ETHYLENE CARBONATE    | 786 |
| n-DECYL ACETATE       | 790 |
| DIISODECYL PHTHALATE  | 791 |
| DIISOBUTYL PHTHALATE  | 796 |
| 2-ETHYLHEXYL ACRYLATE | 806 |
| METHYL BENZOATE       | 810 |
| ETHYL BENZOATE        | 811 |
| DIETHYL CARBONATE     | 812 |
| DIMETHYL ETHER        | 821 |
| DIETHYL ETHER         | 822 |
| DIISOPROPYL ETHER     | 823 |



---

|                             |     |
|-----------------------------|-----|
| DI-n-BUTYL ETHER            | 824 |
| METHYL tert-BUTYL ETHER     | 825 |
| METHYL ETHYL ETHER          | 827 |
| DIVINYL ETHER               | 834 |
| ETHYL PROPYL ETHER          | 835 |
| 1,4-DIOXANE                 | 839 |
| TRIOXANE                    | 840 |
| tert-BUTYL ETHYL ETHER      | 846 |
| METHYLAL                    | 849 |
| ACETAL                      | 850 |
| 1,2-EPOXY-2-METHYLPROPANE   | 858 |
| ETHYLENE OXIDE              | 859 |
| 1,2-PROPYLENE OXIDE         | 860 |
| 1,3-PROPYLENE OXIDE         | 861 |
| ETHYL VINYL ETHER           | 862 |
| 1,2-DIMETHOXYETHANE         | 872 |
| ANISOLE                     | 878 |
| PHENETOLE                   | 879 |
| DIPHENYL ETHER              | 882 |
| METHYL VINYL ETHER          | 887 |
| FURAN                       | 895 |
| TETRAHYDROFURAN             | 896 |
| DI-t-BUTYL PEROXIDE         | 899 |
| METHYL CHLORIDE             | 912 |
| ETHYL CHLORIDE              | 913 |
| VINYL CHLORIDE              | 914 |
| 1,4-DICHLORO-trans-2-BUTENE | 915 |
| DICHLOROMETHANE             | 921 |
| 1,1-DICHLOROETHANE          | 924 |
| 1,2-DICHLOROETHANE          | 925 |
| 1,1,2-TRICHLOROETHANE       | 926 |
| 1,2-DICHLOROPROPANE         | 928 |
| 1,1,1-TRICHLOROETHANE       | 929 |
| ISOPROPYL CHLORIDE          | 932 |
| ISOBUTYL CHLORIDE           | 935 |
| TRICHLOROETHYLENE           | 939 |
| 3-CHLOROPROPENE             | 941 |
| BENZYL CHLORIDE             | 944 |
| MONOCHLOROBENZENE           | 947 |
| o-DICHLOROBENZENE           | 948 |
| o-CHLOROTOLUENE             | 953 |
| p-CHLOROTOLUENE             | 954 |
| cis-1,2-DICHLOROETHYLENE    | 956 |
| trans-1,2-DICHLOROETHYLENE  | 957 |

---

|                               |      |
|-------------------------------|------|
| CHLOROPRENE                   | 959  |
| PROPYL CHLORIDE               | 960  |
| n-BUTYL CHLORIDE              | 961  |
| 1-CHLOROPENTANE               | 963  |
| 1,1-DICHLOROETHYLENE          | 966  |
| 1,2,4-TRICHLOROBENZENE        | 967  |
| 2-CHLOROPROPENE               | 970  |
| 3,4-DICHLORO-1-BUTENE         | 972  |
| CHLOROFLUOROMETHANE           | 975  |
| PENTAFLUOROETHYL METHYL ETHER | 983  |
| METHYL FLUORIDE               | 986  |
| DIFLUOROMETHANE               | 987  |
| ETHYL FLUORIDE                | 990  |
| 1,1,1-TRIFLUOROETHANE         | 991  |
| 1,1-DIFLUOROETHYLENE          | 1000 |
| TETRAFLUOROETHYLENE           | 1001 |
| 1,1-DIFLUOROETHANE            | 1006 |
| BROMOMETHANE                  | 1007 |
| BROMOETHANE                   | 1008 |
| 2-BROMOPROPANE                | 1012 |
| 1-BROMOBUTANE                 | 1015 |
| METHYL IODIDE                 | 1022 |
| METHYLAMINE                   | 1036 |
| DIMETHYLAMINE                 | 1037 |
| TRIMETHYLAMINE                | 1038 |
| ETHYLAMINE                    | 1039 |
| TRIETHYLAMINE                 | 1041 |
| DI-n-PROPYLAMINE              | 1042 |
| DIETHYLAMINE                  | 1045 |
| n-PROPYLAMINE                 | 1046 |
| n-BUTYLAMINE                  | 1047 |
| n-PENTYLAMINE                 | 1048 |
| HYDRAZINE                     | 1051 |
| ISOPROPYLAMINE                | 1053 |
| PYRROLE                       | 1055 |
| DIETHANOLAMINE                | 1058 |
| tert-BUTYLAMINE               | 1061 |
| CYCLOHEXYLAMINE               | 1062 |
| HEXAMETHYLENEDIAMINE          | 1064 |
| ALLYLAMINE                    | 1073 |
| ETHYLENEDIAMINE               | 1074 |
| ETHYLENEIMINE                 | 1075 |
| DI-n-BUTYLAMINE               | 1077 |
| NITROMETHANE                  | 1093 |

---

|                                           |      |
|-------------------------------------------|------|
| NITROETHANE                               | 1094 |
| 1-NITROPROPANE                            | 1095 |
| 2-NITROPROPANE                            | 1096 |
| HYDRACRYLONITRILE                         | 1097 |
| MORPHOLINE                                | 1098 |
| PYRROLIDINE                               | 1099 |
| ACETONITRILE                              | 1104 |
| PROPIONITRILE                             | 1105 |
| ACRYLONITRILE                             | 1106 |
| METHACRYLONITRILE                         | 1107 |
| o-NITROTOLUENE                            | 1110 |
| p-NITROTOLUENE                            | 1111 |
| BUTYRONITRILE                             | 1114 |
| VALERONITRILE                             | 1115 |
| HEXANENITRILE                             | 1117 |
| ISOBUTYRONITRILE                          | 1118 |
| trans-CROTONITRILE                        | 1119 |
| BENZONITRILE                              | 1120 |
| PYRIDINE                                  | 1121 |
| ANILINE                                   | 1122 |
| 2,4-TOLUENE DIISOCYANATE                  | 1123 |
| HEXAMETHYLENEIMINE                        | 1124 |
| N,N-DIMETHYLANILINE                       | 1126 |
| 2-METHYLPYRIDINE                          | 1127 |
| cis-CROTONITRILE                          | 1128 |
| CYANOGEN                                  | 1129 |
| METHYL MERCAPTAN                          | 1130 |
| ETHYL MERCAPTAN                           | 1131 |
| DIMETHYL SULFIDE                          | 1149 |
| THIOPHENE                                 | 1150 |
| TETRAHYDROTHIOPHENE                       | 1172 |
| DIMETHYL SULFOXIDE                        | 1173 |
| ACETYL CHLORIDE                           | 1179 |
| BENZOYL CHLORIDE                          | 1184 |
| DI(2-CHLOROETHYL)ETHER                    | 1194 |
| N,N-DIMETHYLFORMAMIDE                     | 1204 |
| alpha-EPOCHLOROHYDRIN                     | 1209 |
| ACETONE CYANOHYDRIN                       | 1210 |
| FURFURAL                                  | 1217 |
| PROPYLENE GLYCOL MONOMETHYL ETHER ACETATE | 1224 |
| HEXAMETHYLDISILOXANE                      | 1263 |
| HEXAMETHYLCYCLOTETRAHYDROXYLANE           | 1264 |
| TETRAMETHYLSILANE                         | 1278 |
| OCTAMETHYLCYCLOTETRAHYDROXYLANE           | 1281 |

---

|                                |      |
|--------------------------------|------|
| 2,6-DIMETHYL-4-HEPTANOL        | 1310 |
| 2-ETHYL HEXANOIC ACID          | 1339 |
| n-HEXYL FORMATE                | 1365 |
| CYCLOHEXYL ACETATE             | 1377 |
| PROPYLENE CARBONATE            | 1378 |
| DIETHYL PHTHALATE              | 1382 |
| DI-n-BUTYL PHTHALATE           | 1383 |
| DIMETHYL PHTHALATE             | 1384 |
| ISOBUTYL ACRYLATE              | 1390 |
| DIISOBUTYL ETHER               | 1399 |
| 1,1-DICHLOROPROPANE            | 1408 |
| 2,3-DICHLOROPROPENE            | 1410 |
| 3,3,3-TRIFLUOROPROPENE         | 1419 |
| 1,1,2-TRIFLUOROETHANE          | 1420 |
| 1,1,2,2,3-PENTAFLUOROPROPANE   | 1426 |
| 1,2-DIFLUOROETHANE             | 1436 |
| 1,1-DICHLORO-1-FLUOROETHANE    | 1441 |
| p-BROMOTOLUENE                 | 1452 |
| CHLOROTRIFLUOROETHYLENE        | 1459 |
| VINYL BROMIDE                  | 1462 |
| 1-CHLORO-1,1-DIFLUOROETHANE    | 1463 |
| VINYL FLUORIDE                 | 1464 |
| n-OCTYLAMINE                   | 1467 |
| n-NONYLAMINE                   | 1468 |
| TRI-n-BUTYLAMINE               | 1474 |
| TRIPROPYLAMINE                 | 1477 |
| n-BUTYL ISOCYANATE             | 1480 |
| o-PHENYLENEDIAMINE             | 1483 |
| DIALLYLAMINE                   | 1497 |
| p-PHENYLENEDIAMINE             | 1508 |
| 3-METHYLPYRIDINE               | 1536 |
| METHYLGLUTARONITRILE           | 1537 |
| 4-METHYLPYRIDINE               | 1538 |
| 1,6-HEXAMETHYLENE DIISOCYANATE | 1539 |
| CAMPHOR                        | 1550 |
| N-METHYLFORMAMIDE              | 1552 |
| DIACETONE ALCOHOL              | 1554 |
| FURFURYL ALCOHOL               | 1555 |
| N,N-DIMETHYLACETAMIDE          | 1556 |
| 2-METHOXYETHANOL               | 1560 |
| 2-ETHOXYETHANOL                | 1561 |
| 2-BUTOXYETHANOL                | 1562 |
| 2-(2-METHOXYETHOXY)ETHANOL     | 1563 |
| 2-(2-ETHOXYETHOXY)ETHANOL      | 1564 |

---

|                                           |      |
|-------------------------------------------|------|
| 2-AMINOETHOXYETHANOL                      | 1565 |
| METHYL LACTATE                            | 1575 |
| 2-CHLOROETHANOL                           | 1596 |
| OCTAMETHYLTRISILOXANE                     | 1630 |
| ISOBUTYRIC ANHYDRIDE                      | 1672 |
| 3-(N,N-DIMETHYLAMINO) PROPYLAMINE         | 1744 |
| TETRAMETHYLETHYLENEDIAMINE                | 1761 |
| BENZIDINE                                 | 1766 |
| N-ETHYLANILINE                            | 1768 |
| PROPYLENE GLYCOL 1-tert-BUTYL ETHER       | 1809 |
| DIETHYLENE GLYCOL MONOPROPYL ETHER        | 1812 |
| p-CHLOROANILINE                           | 1813 |
| DIPROPYLENE GLYCOL n-PROPYL ETHER         | 1821 |
| DIETHYLENE GLYCOL MONOBUTYL ETHER ACETATE | 1823 |
| 1-ETHOXY-2-PROPANOL                       | 1846 |
| TETRAETHOXYSILANE                         | 1859 |
| METHYL TRICHLOROSILANE                    | 1867 |
| VINYLTRICHLOROSILANE                      | 1868 |
| TRIMETHYLCHLOROSILANE                     | 1904 |
| DIMETHYLDICHLOROSILANE                    | 1905 |
| DICHLORODIETHYLSILANE                     | 1910 |
| ETHYLENE GLYCOL MONOPROPYL ETHER          | 1921 |
| 2-(2-BUTOXYETHOXY)ETHANOL                 | 1922 |
| 1-CHLORO-2,4-DINITROBENZENE               | 1934 |
| METHYL CHLOROFORMATE                      | 1939 |
| 3,4-DICHLOROANILINE                       | 1941 |
| TRIETHYL PHOSPHATE                        | 1946 |
| CYCLOHEXANONE OXIME                       | 1949 |
| VINYLTRIMETHOXYSILANE                     | 1951 |
| DIMETHYLDIMETHOXYSILANE                   | 1953 |
| TRIMETHYL SILANOL                         | 1957 |
| 1-AMINO-2-PROPANOL                        | 1969 |
| METHYL CHLOROACETATE                      | 1970 |
| DIMETHYL SULFATE                          | 1978 |
| ETHYL LACTATE                             | 1987 |
| 2-ETHOXYETHYL ACETATE                     | 1988 |
| DIETHYLENE GLYCOL ETHYL ETHER ACETATE     | 1989 |
| ETHYL ACETOACETATE                        | 1991 |
| 3-METHOXYPROPIONITRILE                    | 1994 |
| 2-MERCAPTOETHANOL                         | 2011 |
| ETHYLENE GLYCOL MONOBUTYL ETHER ACETATE   | 2021 |
| ETHYL-3-ETHOXYPROPIONATE                  | 2025 |
| 1-METHYLVINYL ACETATE                     | 2030 |

---

**Table S5.** The compounds correlated in the QSPR modeling for UFL

| Name                       | Index |
|----------------------------|-------|
| METHANE                    | 0     |
| PROPANE                    | 2     |
| n-BUTANE                   | 4     |
| n-PENTANE                  | 6     |
| ISOPENTANE                 | 7     |
| NEOPENTANE                 | 8     |
| 2-METHYLPENTANE            | 10    |
| 3-METHYLPENTANE            | 11    |
| 2,2-DIMETHYLBUTANE         | 12    |
| 2,3-DIMETHYLBUTANE         | 13    |
| n-HEPTANE                  | 14    |
| 2-METHYLHEXANE             | 15    |
| 2,2-DIMETHYLPENTANE        | 18    |
| 2,3-DIMETHYLPENTANE        | 19    |
| n-OCTANE                   | 23    |
| 2,2,4-TRIMETHYLPENTANE     | 37    |
| n-NONANE                   | 41    |
| 3,3-DIETHYLPENTANE         | 45    |
| 2,2,3,3-TETRAMETHYLPENTANE | 46    |
| n-DECANE                   | 51    |
| CYCLOBUTANE                | 91    |
| METHYLCYCLOPENTANE         | 93    |
| ETHYLCYCLOPENTANE          | 94    |
| CYCLOHEXANE                | 115   |
| METHYLCYCLOHEXANE          | 116   |
| ETHYLCYCLOHEXANE           | 117   |
| cis-DECAHYDRONAPHTHALENE   | 130   |
| trans-DECAHYDRONAPHTHALENE | 131   |
| BICYCLOHEXYL               | 132   |
| 1,1-DIETHYLCYCLOHEXANE     | 133   |
| CYCLOHEPTANE               | 135   |
| PROPYLENE                  | 147   |
| 1-BUTENE                   | 149   |
| cis-2-BUTENE               | 150   |
| trans-2-BUTENE             | 151   |
| ISOBUTENE                  | 152   |
| 1-PENTENE                  | 154   |
| 2-METHYL-2-BUTENE          | 159   |
| 1-OCTENE                   | 195   |
| 2,4,4-TRIMETHYL-1-PENTENE  | 197   |
| 1-DECENE                   | 201   |
| 1-DODECENE                 | 203   |

---

|                               |     |
|-------------------------------|-----|
| CYCLOHEXENE                   | 211 |
| d-LIMONENE                    | 229 |
| 1,3-BUTADIENE                 | 238 |
| ISOPRENE                      | 244 |
| METHYLCYCLOPENTADIENE         | 247 |
| 1,4-HEXADIENE                 | 248 |
| DICYCLOPENTADIENE             | 251 |
| VINYLACETYLENE                | 279 |
| BENZENE                       | 286 |
| TOLUENE                       | 287 |
| ETHYLBENZENE                  | 289 |
| o-XYLENE                      | 290 |
| m-XYLENE                      | 291 |
| p-XYLENE                      | 292 |
| CUMENE                        | 295 |
| 1,2,3-TRIMETHYLBENZENE        | 299 |
| 1,2,4-TRIMETHYLBENZENE        | 300 |
| MESITYLENE                    | 301 |
| n-BUTYLBENZENE                | 303 |
| ISOBUTYLBENZENE               | 304 |
| sec-BUTYLBENZENE              | 305 |
| tert-BUTYLBENZENE             | 306 |
| p-CYMENE                      | 309 |
| p-DIETHYLBENZENE              | 312 |
| BIPHENYL                      | 338 |
| 2-PHENYLBUTENE-1              | 362 |
| STYRENE                       | 378 |
| m-METHYLSTYRENE               | 380 |
| p-METHYLSTYRENE               | 385 |
| alpha-METHYLSTYRENE           | 386 |
| m-DIVINYLBENZENE              | 387 |
| NAPHTHALENE                   | 395 |
| 1-METHYLNAPHTHALENE           | 396 |
| 1,2,3,4-TETRAHYDRONAPHTHALENE | 399 |
| sec-BUTYLCYCLOHEXANE          | 445 |
| ACETALDEHYDE                  | 475 |
| PROPANAL                      | 476 |
| BUTANAL                       | 478 |
| 2-METHYLPROPANAL              | 479 |
| 2-ETHYLHEXANAL                | 486 |
| ACROLEIN                      | 499 |
| trans-CROTONALDEHYDE          | 501 |
| BENZALDEHYDE                  | 506 |
| ACETONE                       | 514 |

---

|                            |     |
|----------------------------|-----|
| METHYL ETHYL KETONE        | 515 |
| 3-PENTANONE                | 516 |
| METHYL ISOBUTYL KETONE     | 517 |
| 3-HEXANONE                 | 522 |
| 2-PENTANONE                | 523 |
| METHYL ISOPROPYL KETONE    | 524 |
| 2-HEXANONE                 | 525 |
| 2-HEPTANONE                | 526 |
| 5-METHYL-2-HEXANONE        | 527 |
| MESITYL OXIDE              | 528 |
| DIISOBUTYL KETONE          | 530 |
| N-METHYL-2-PYRROLIDONE     | 533 |
| 2-NONANONE                 | 536 |
| CYCLOPENTANONE             | 540 |
| CYCLOHEXANONE              | 541 |
| gamma-BUTYROLACTONE        | 546 |
| METHYL ISOPROPENYL KETONE  | 550 |
| ETHANOL                    | 556 |
| 1-PROPANOL                 | 557 |
| ISOPROPANOL                | 558 |
| 1-BUTANOL                  | 559 |
| 2-METHYL-1-PROPANOL        | 560 |
| 2-BUTANOL                  | 561 |
| 2-METHYL-2-PROPANOL        | 562 |
| 1-PENTANOL                 | 563 |
| 2-PENTANOL                 | 564 |
| 2-METHYL-1-BUTANOL         | 566 |
| 2-METHYL-1-PENTANOL        | 571 |
| 3-PENTANOL                 | 574 |
| 2-ETHYL-1-HEXANOL          | 575 |
| 3-METHYL-1-BUTANOL         | 577 |
| 4-METHYL-2-PENTANOL        | 583 |
| 1-NONANOL                  | 587 |
| CYCLOHEXANOL               | 603 |
| TETRAHYDROFURFURYL ALCOHOL | 618 |
| ALLYL ALCOHOL              | 619 |
| 1,2-PROPYLENE GLYCOL       | 653 |
| NEOPENTYL GLYCOL           | 656 |
| 2-BUTYNE-1,4-DIOL          | 657 |
| HEXYLENE GLYCOL            | 663 |
| GLYCEROL                   | 665 |
| cis-2-BUTENE-1,4-DIOL      | 673 |
| trans-2-BUTENE-1,4-DIOL    | 674 |
| 1,4-BUTANEDIOL             | 675 |



---

|                           |     |
|---------------------------|-----|
| FORMIC ACID               | 685 |
| ACETIC ACID               | 686 |
| PROPIONIC ACID            | 687 |
| n-BUTYRIC ACID            | 690 |
| n-PENTANOIC ACID          | 692 |
| ISOBUTYRIC ACID           | 694 |
| trans-CROTONIC ACID       | 708 |
| ACRYLIC ACID              | 711 |
| METHACRYLIC ACID          | 712 |
| ACETIC ANHYDRIDE          | 725 |
| PROPIONIC ANHYDRIDE       | 726 |
| BUTYRIC ANHYDRIDE         | 727 |
| PHTHALIC ANHYDRIDE        | 731 |
| METHYL FORMATE            | 734 |
| ETHYL FORMATE             | 735 |
| n-BUTYL FORMATE           | 737 |
| ISOBUTYL FORMATE          | 738 |
| METHYL ACETATE            | 744 |
| n-PROPYL ACETATE          | 746 |
| n-BUTYL ACETATE           | 747 |
| ISOBUTYL ACETATE          | 748 |
| ISOPENTYL ACETATE         | 749 |
| ALLYL ACETATE             | 750 |
| VINYL ACETATE             | 753 |
| METHYL PROPIONATE         | 754 |
| ETHYL PROPIONATE          | 755 |
| n-PROPYL n-BUTYRATE       | 758 |
| METHYL ACRYLATE           | 764 |
| ETHYL ACRYLATE            | 765 |
| n-BUTYL ACRYLATE          | 767 |
| METHYL METHACRYLATE       | 771 |
| DIOCTYL PHTHALATE         | 774 |
| DIISOCTYL PHTHALATE       | 775 |
| n-PENTYL ACETATE          | 777 |
| 2-ETHYLHEXYL ACETATE      | 778 |
| ISOBUTYL ISOBUTYRATE      | 780 |
| ETHYLENE CARBONATE        | 786 |
| 2-ETHYLHEXYL ACRYLATE     | 806 |
| ETHYLENE GLYCOL DIACETATE | 807 |
| n-BUTYL METHACRYLATE      | 809 |
| DIMETHYL ETHER            | 821 |
| DIISOPROPYL ETHER         | 823 |
| DI-n-BUTYL ETHER          | 824 |
| METHYL tert-BUTYL ETHER   | 825 |

---

|                               |     |
|-------------------------------|-----|
| METHYL ETHYL ETHER            | 827 |
| METHYL n-PROPYL ETHER         | 828 |
| DIVINYL ETHER                 | 834 |
| ETHYL PROPYL ETHER            | 835 |
| 1,4-DIOXANE                   | 839 |
| METHYL tert-PENTYL ETHER      | 845 |
| tert-BUTYL ETHYL ETHER        | 846 |
| METHYLAL                      | 849 |
| 1,2-EPOXY-2-METHYLPROPANE     | 858 |
| 1,2-PROPYLENE OXIDE           | 860 |
| 1,3-PROPYLENE OXIDE           | 861 |
| 1,2-DIMETHOXYETHANE           | 872 |
| DIPHENYL ETHER                | 882 |
| 1,2-EPOXYBUTANE               | 888 |
| CUMENE HYDROPEROXIDE          | 889 |
| FURAN                         | 895 |
| TETRAHYDROFURAN               | 896 |
| METHYL CHLORIDE               | 912 |
| ETHYL CHLORIDE                | 913 |
| VINYL CHLORIDE                | 914 |
| DICHLOROMETHANE               | 921 |
| 1,2-DICHLOROETHANE            | 925 |
| 1,1,2-TRICHLOROETHANE         | 926 |
| 1,2-DICHLOROPROPANE           | 928 |
| 1,1,1-TRICHLOROETHANE         | 929 |
| ISOPROPYL CHLORIDE            | 932 |
| ISOBUTYL CHLORIDE             | 935 |
| 3-CHLOROPROPENE               | 941 |
| o-DICHLOROBENZENE             | 948 |
| o-CHLOROTOLUENE               | 953 |
| p-CHLOROTOLUENE               | 954 |
| cis-1,2-DICHLOROETHYLENE      | 956 |
| trans-1,2-DICHLOROETHYLENE    | 957 |
| CHLOROPRENE                   | 959 |
| PROPYL CHLORIDE               | 960 |
| n-BUTYL CHLORIDE              | 961 |
| 1-CHLOROPENTANE               | 963 |
| 1,1-DICHLOROETHYLENE          | 966 |
| 1,2,4-TRICHLOROBENZENE        | 967 |
| 2-CHLOROPROPENE               | 970 |
| 3,4-DICHLORO-1-BUTENE         | 972 |
| CHLOROFLUOROMETHANE           | 975 |
| PENTAFLUOROETHYL METHYL ETHER | 983 |
| METHYL FLUORIDE               | 986 |

---

|                       |      |
|-----------------------|------|
| DIFLUOROMETHANE       | 987  |
| ETHYL FLUORIDE        | 990  |
| 1,1,1-TRIFLUOROETHANE | 991  |
| 1,1-DIFLUOROETHYLENE  | 1000 |
| TETRAFLUOROETHYLENE   | 1001 |
| 1,1-DIFLUOROETHANE    | 1006 |
| BROMOMETHANE          | 1007 |
| BROMOETHANE           | 1008 |
| 1-BROMOPROPANE        | 1011 |
| 1-BROMOBUTANE         | 1015 |
| DIMETHYLAMINE         | 1037 |
| TRIMETHYLAMINE        | 1038 |
| ETHYLAMINE            | 1039 |
| TRIETHYLAMINE         | 1041 |
| DI-n-PROPYLAMINE      | 1042 |
| DIETHYLAMINE          | 1045 |
| n-PROPYLAMINE         | 1046 |
| n-BUTYLAMINE          | 1047 |
| ISOBUTYLAMINE         | 1049 |
| HYDRAZINE             | 1051 |
| DIISOBUTYLAMINE       | 1052 |
| ISOPROPYLAMINE        | 1053 |
| PYRROLE               | 1055 |
| MONOETHANOLAMINE      | 1057 |
| tert-BUTYLAMINE       | 1061 |
| HEXAMETHYLENEDIAMINE  | 1064 |
| ALLYLAMINE            | 1073 |
| ETHYLENEIMINE         | 1075 |
| DIISOPROPYLAMINE      | 1076 |
| DI-n-BUTYLAMINE       | 1077 |
| QUINOLINE             | 1081 |
| 1,2-PROPANEDIAMINE    | 1085 |
| NITROMETHANE          | 1093 |
| 2-NITROPROPANE        | 1096 |
| HYDRACRYLONITRILE     | 1097 |
| MORPHOLINE            | 1098 |
| PYRROLIDINE           | 1099 |
| ACETONITRILE          | 1104 |
| PROPIONITRILE         | 1105 |
| ACRYLONITRILE         | 1106 |
| METHACRYLONITRILE     | 1107 |
| ADIPONITRILE          | 1109 |
| HEXANENITRILE         | 1117 |
| ISOBUTYRONITRILE      | 1118 |

---

|                                           |      |
|-------------------------------------------|------|
| BENZONITRILE                              | 1120 |
| PYRIDINE                                  | 1121 |
| ANILINE                                   | 1122 |
| 2,4-TOLUENE DIISOCYANATE                  | 1123 |
| HEXAMETHYLENEIMINE                        | 1124 |
| N,N-DIMETHYLANILINE                       | 1126 |
| 2-METHYLPYRIDINE                          | 1127 |
| CYANOGEN                                  | 1129 |
| METHYL MERCAPTAN                          | 1130 |
| ETHYL MERCAPTAN                           | 1131 |
| DIMETHYL SULFIDE                          | 1149 |
| THIOPHENE                                 | 1150 |
| TETRAHYDROTHIOPHENE                       | 1172 |
| DIMETHYL SULFOXIDE                        | 1173 |
| ACETYL CHLORIDE                           | 1179 |
| BENZOYL CHLORIDE                          | 1184 |
| FLUOROBENZENE                             | 1188 |
| N,N-DIMETHYLFORMAMIDE                     | 1204 |
| alpha-EPICHLOROHYDRIN                     | 1209 |
| ACETONE CYANOHYDRIN                       | 1210 |
| FURFURAL                                  | 1217 |
| PROPYLENE GLYCOL MONOMETHYL ETHER ACETATE | 1224 |
| HEXAMETHYLDISILOXANE                      | 1263 |
| HEXAMETHYLCYCLOTRISILOXANE                | 1264 |
| TETRAMETHYLSILANE                         | 1278 |
| 2,6-DIMETHYL-4-HEPTANOL                   | 1310 |
| 2-ETHYL HEXANOIC ACID                     | 1339 |
| PROPYLENE CARBONATE                       | 1378 |
| 2,3-DICHLOROPROPENE                       | 1410 |
| 3,3,3-TRIFLUOROPROPENE                    | 1419 |
| 1,1,2-TRIFLUOROETHANE                     | 1420 |
| 1,1,2,2,3-PENTAFLUOROPROPANE              | 1426 |
| 1,2-DIFLUOROETHANE                        | 1436 |
| 1,1-DICHLORO-1-FLUOROETHANE               | 1441 |
| CHLOROTRIFLUOROETHYLENE                   | 1459 |
| VINYL BROMIDE                             | 1462 |
| 1-CHLORO-1,1-DIFLUOROETHANE               | 1463 |
| VINYL FLUORIDE                            | 1464 |
| n-OCTYLAMINE                              | 1467 |
| n-NONYLAMINE                              | 1468 |
| TRI-n-BUTYLAMINE                          | 1474 |
| TRIPROPYLAMINE                            | 1477 |
| n-BUTYL ISOCYANATE                        | 1480 |
| DIALLYLAMINE                              | 1497 |

---

|                                                        |      |
|--------------------------------------------------------|------|
| ISOQUINOLINE                                           | 1525 |
| 3-METHYLPYRIDINE                                       | 1536 |
| METHYLGLUTARONITRILE                                   | 1537 |
| 4-METHYLPYRIDINE                                       | 1538 |
| 1,6-HEXAMETHYLENE DIISOCYANATE                         | 1539 |
| CAMPHOR                                                | 1550 |
| N-METHYLFORMAMIDE                                      | 1552 |
| DIACETONE ALCOHOL                                      | 1554 |
| FURFURYL ALCOHOL                                       | 1555 |
| N,N-DIMETHYLACETAMIDE                                  | 1556 |
| 2-METHOXYETHANOL                                       | 1560 |
| 2-ETHOXYETHANOL                                        | 1561 |
| 2-BUTOXYETHANOL                                        | 1562 |
| 2-(2-METHOXYETHOXY)ETHANOL                             | 1563 |
| 2-(2-ETHOXYETHOXY)ETHANOL                              | 1564 |
| 2-AMINOETHOXYETHANOL                                   | 1565 |
| 2-METHYL-, 3-HYDROXY-2,2,4- TRIMETHYLPENTYL PROPANOATE | 1588 |
| 2-CHLOROETHANOL                                        | 1596 |
| ISOBUTYRIC ANHYDRIDE                                   | 1672 |
| 3-(N,N-DIMETHYLAMINO) PROPYLAMINE                      | 1744 |
| TETRAMETHYLETHYLENEDIAMINE                             | 1761 |
| N-ETHYLANILINE                                         | 1768 |
| PROPYLENE GLYCOL 1-tert-BUTYL ETHER                    | 1809 |
| 2-(2-HEXOXYETHOXY)ETHANOL                              | 1819 |
| DIPROPYLENE GLYCOL n-PROPYL ETHER                      | 1821 |
| DIETHYLENE GLYCOL MONOBUTYL ETHER ACETATE              | 1823 |
| 1-ETHOXY-2-PROPANOL                                    | 1846 |
| VINYLTRICHLOROSILANE                                   | 1868 |
| DECAMETHYLCYCLOPENTASILOXANE                           | 1906 |
| ETHYLENE GLYCOL MONOPROPYL ETHER                       | 1921 |
| 1-CHLORO-2,4-DINITROBENZENE                            | 1934 |
| METHYL CHLOROFORMATE                                   | 1939 |
| 3,4-DICHLOROANILINE                                    | 1941 |
| TRIETHYL PHOSPHATE                                     | 1946 |
| VINYLTRIMETHOXYSILANE                                  | 1951 |
| PHENYLTRICHLOROSILANE                                  | 1954 |
| 3-AMINO-1-PROPANOL                                     | 1968 |
| 1-AMINO-2-PROPANOL                                     | 1969 |
| METHYL CHLOROACETATE                                   | 1970 |
| DIMETHYL SULFATE                                       | 1978 |
| ETHYL LACTATE                                          | 1987 |
| 2-ETHOXYETHYL ACETATE                                  | 1988 |
| DIETHYLENE GLYCOL ETHYL ETHER ACETATE                  | 1989 |
| ETHYL ACETOACETATE                                     | 1991 |

103

104

105

106 **S5. Training the proposed MDNN**

107 The joint training and alternative training are often employed in the modeling of multi-task  
108 deep learning network. The joint training requires that all the data of multiple target properties  
109 in one row are available, which is calculated according to the loss values and standard deviation  
110 of residuals of each task. The joint training is used to update all parameters simultaneously in  
111 the MDNN when the joint loss is back-propagated. The whole process is shown in **Figure S3**.

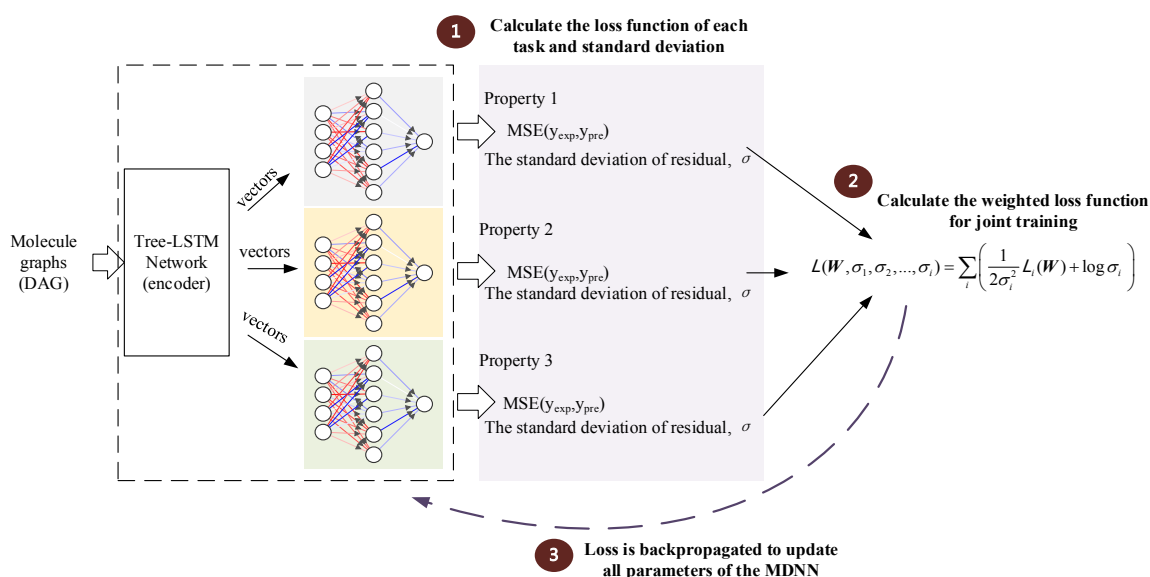

112

113 **Figure S3.** The flowchart of joint training in the proposed MDNN (the solid arrow means feedforward  
114 and the dashed arrow means backpropagation)

115

116 The alternative training was employed to train blocks of the MDNN in rotation. In this  
117 strategy of training, the loss gradients of each task are respectively back-propagated. The  
118 parameters of Tree-LSTM network are updated by the loss gradients with different weights of  
119 residual dispersion. And each FNN only used to the corresponding target property are trained  
120 based on the loss of each task without the weight. The whole flowchart of alternative training  
121 is presented in **Figure S4**. In this study, the joint training and alternative training were both  
122 employed to train the MDNN as shown in **Figure S5**.

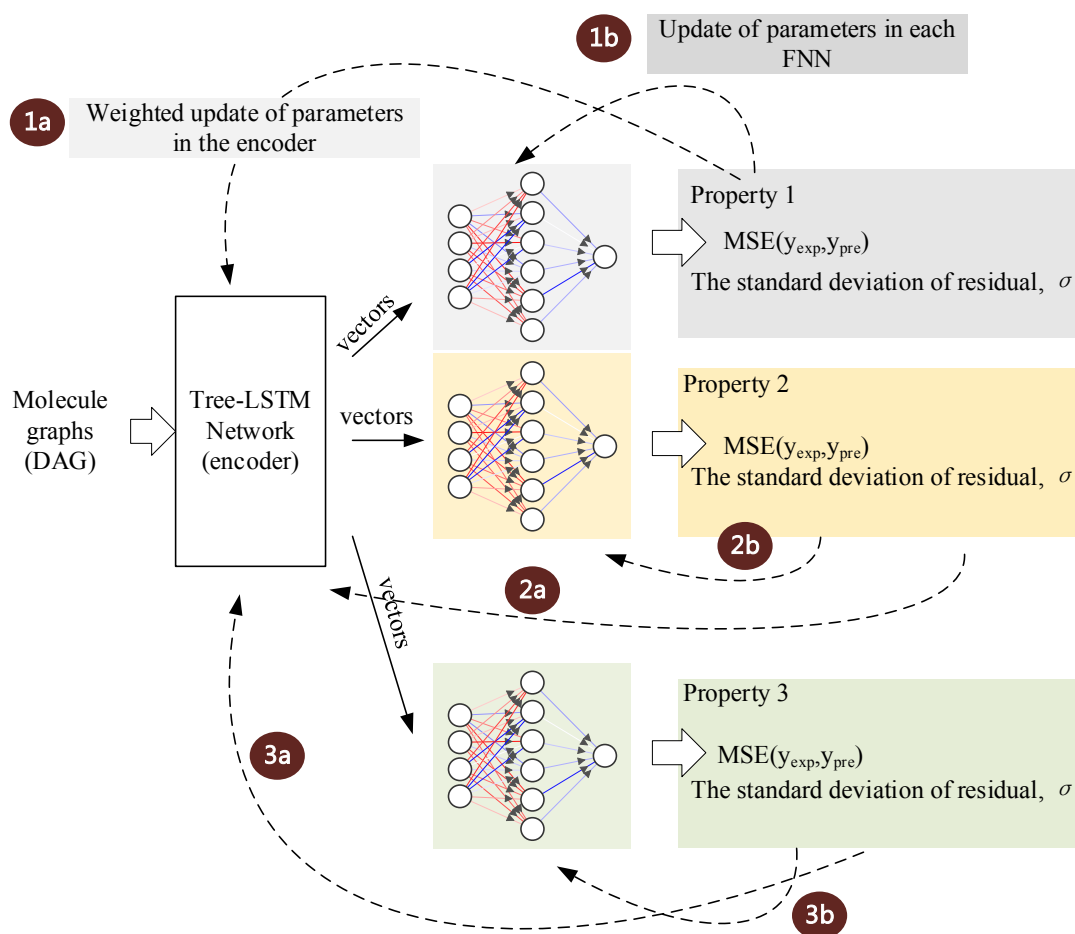

124

125 **Figure S4.** The flowchart of alternative training in the proposed MDNN (the solid arrow means  
126 feedforward and the dashed arrow means backpropagation)

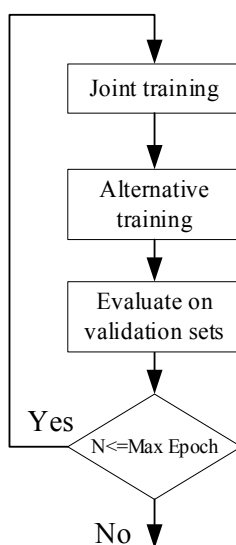

127

128 **Figure S5.** The schematic diagram of the training workflow combined the joint and alternative training

129

## 130 S6. Comparison between the proposed model and existing models

131 To investigate the performance of the MDNN model, the learned model with previous  
132 prediction models for the four properties was compared. Even though it is difficult to compare  
133 the learned MDNN model with the previous prediction models fully and fairly, because each  
134 model might be regressed from different data sets involving different set sizes, different  
135 categories of compounds, or different molecular descriptors.

### 136 *Flash point temperature*

137 The final correlation results obtained in this work presents an  $r$  of 0.9808 for the training  
138 set, an  $r$  of 0.9643 and an  $r$  of 0.9554 for the validation set and test set respectively. As compared  
139 with other previous studies, the values of  $MPE$  and  $R^2$  indicates that the multi-task model could  
140 provide competitive ability in prediction (**Table S6**). The proposed MDNN model was trained  
141 on the training set including 822 pure compounds, and it also tested on the test set involving  
142 177 pure compounds. The predicted results of the test set prove that the proposed model can  
143 estimate the FPT values for other compounds that not included in the training set, although the  
144 value of  $R^2$  decreases slightly. It should be noted that the linear or non-linear models proposed  
145 by Frutiger *et al.*<sup>7</sup>, Hukkerikar *et al.*<sup>8</sup>, Suzuki<sup>9</sup> and Khajeh and Modarress<sup>10</sup> had not been  
146 validated on the external test sets. As a result, the transferability of NLR and MLR models is  
147 not verified on extra test sets, though they outperformed on the training sets. By contrast, the  
148 models based on classical machine learning (*i.e.*, ANN, ANFIS and SVM) proposed by  
149 Gharagheizi *et al.*<sup>11</sup>, Pan *et al.*<sup>12</sup>, Khajeh and Modarress<sup>10</sup>, Albahri<sup>13</sup> and Patel *et al.*<sup>14</sup> also  
150 showed good accuracy, while the models of Patel *et al.*<sup>14</sup>, Albahri<sup>13</sup> and Khajeh and Modarress<sup>10</sup>  
151 were obtained from less compounds. Notably, Gharagheizi *et al.*<sup>11</sup> obtained the model on the  
152 data set including both experimental and predicted values of FPT.

153 **Table S6.** The comparison of the proposed model with other existing models for predicting FPT.

| Model                                 | Model type | $MPE$ (%) | $R^2$  | $r$    | No. of data      |
|---------------------------------------|------------|-----------|--------|--------|------------------|
| The proposed model in this work       | MDNN       | 3.120     | 0.9541 | 0.9808 | 822 (train)      |
|                                       |            | 3.401     | 0.9214 | 0.9643 | 177 (validation) |
|                                       |            | 4.001     | 0.9022 | 0.9554 | 177 (test)       |
| Frutiger <i>et al.</i> <sup>7</sup>   | MLR-GC     | 2.0       | 0.9900 | -      | 927 (train)      |
| Hukkerikar <i>et al.</i> <sup>8</sup> | MLR-GC     | 2.8       | 0.9671 | -      | 512 (train)      |
| Hukkerikar <i>et al.</i> <sup>8</sup> | MLR-GC+    | 3.27      | 0.7951 | -      | 512 (train)      |



|                                         |            |       |        |        |              |
|-----------------------------------------|------------|-------|--------|--------|--------------|
| Suzuki <sup>9</sup>                     | NLR-QSPR   | -     | -      | 0.9670 | 400 (train)  |
| Alibakhshi <i>et al.</i> <sup>15</sup>  | MLR-GC     | 1.225 | -      | 0.9935 | 740 (train)  |
| Khajeh and Modarress <sup>10</sup>      | ANFIS-QSPR | -     | 0.9690 | -      | 95 (train)   |
| Gharagheizi <i>et al.</i> <sup>11</sup> | ANN-GC     | -     | 0.9767 | -      | 1241 (train) |
|                                         |            | -     | 0.9661 | -      | 137 (test)   |
| Pan <i>et al.</i> <sup>12</sup>         | SVM-QSPR   | -     | 0.9800 | -      | 1026 (train) |
|                                         |            | -     | 0.9510 | -      | 256 (test)   |
| Albahri <sup>13</sup>                   | ANN-GC     | 1.12  | -      | 0.9961 | 335 (train)  |
|                                         |            | 0.97  | -      | 0.9980 | 40 (test)    |
| Patel <i>et al.</i> <sup>14</sup>       | ANN-QSPR   | -     | 0.8980 | -      | 189 (train)  |
|                                         |            | -     | 0.6620 | -      | 46 (test)    |

154 \*Note: the correlation coefficient  $r$  was applied in this study.

155 Seemingly, the value of  $R^2$  or  $r$  obtained by the proposed MDNN model for the test set is  
 156 lower than the one obtained in the studies involving Gharagheizi *et al.*<sup>11</sup>, Pan *et al.*<sup>12</sup> and  
 157 Albahri<sup>13</sup>. Of note is that the performance metrics of MDNN model were calculated with  
 158 outliers. Albahri<sup>13</sup> obtained the better results on a smaller data set. In a word, the proposed  
 159 MDNN model can provide competitive accuracy of FPT prediction with the three referenced  
 160 models.

### 161 *Auto-ignition temperature*

162 For the property of AIT, the proposed MDNN model was trained on the training set of 232  
 163 compounds and validated on 49 compounds, and finally tested on an external test set of 54  
 164 compounds. The resulting correlation factor  $r$  for the training set is 0.9421 and for the validation  
 165 set it is 0.9135, while the  $r$  is 0.8020 for the test set. The statistical indicators of previous models  
 166 compared with the proposed MDNN are provided in **Table S7**, while the number of data points  
 167 is also presented for the available test set. It can be found that the performance of the MDNN  
 168 is at the same level as the existing models in terms of  $MPE$  and  $R^2$ . The MLR-based models  
 169 proposed by Frutiger<sup>7</sup>, Hukkerikar<sup>8</sup> and Suzuki<sup>16</sup> were not validated by an external test set in  
 170 their studies. Among the previous studies based on ANN or SVM, the ANN-GC model of  
 171 Gharagheizi<sup>17</sup> showed the best accuracy with the most samples involving both experimental  
 172 and predicted values. Notably, Frutiger *et al.*<sup>7</sup> excluded the estimated values in the regression  
 173 and only employed 513 compounds with experimental points. Both Albahri and George<sup>18</sup> and  
 174 Pan *et al.*<sup>17,19</sup> also proposed similar strategies to correlate the property AIT but with fewer

175 substances.

176 **Table S7.** The comparison of the proposed model with other existing models for predicting AIT.

| Models                                | Model types | <i>MPE</i> | <i>R</i> <sup>2</sup> | <i>r</i> | No. of data     |
|---------------------------------------|-------------|------------|-----------------------|----------|-----------------|
| The proposed model in this work       | MDNN        | 5.367      | 0.8845                | 0.9421   | 232 (train)     |
|                                       |             | 6.443      | 0.8173                | 0.9135   | 49 (validation) |
|                                       |             | 9.234      | 0.5985                | 0.8020   | 54 (test)       |
| Hukkerikar <i>et al.</i> <sup>8</sup> | MLR-GC      | 2.09       | 0.9742                | -        | 570 (train)     |
| Frutiger <i>et al.</i> <sup>7</sup>   | MLR-GC      | 6.4        | 0.76                  | -        | 513 (train)     |
| Suzuki <sup>16</sup>                  | MLR-QSPR    | -          | -                     | 0.881    | 250 (train)     |
| Albahri and George <sup>18</sup>      | ANN-GC      | 2.6        | 0.98                  | -        | 470 (train)     |
|                                       |             | 2.9        | 0.98                  | -        | 20 (test)       |
| Gharagheizi <sup>17</sup>             | ANN-GC      | 1.6        | 0.984                 | -        | 821 (train)     |
|                                       |             | 1.6        | 0.986                 | -        | 102 (test)      |
| Pan <i>et al.</i> <sup>19</sup>       | SVM-QSPR    | -          | 0.901                 | -        | 356 (train)     |
|                                       |             | -          | 0.874                 | -        | 90 (test)       |
| Pan <i>et al.</i> <sup>20</sup>       | ANN-QSPR    | -          | -                     | 0.9741   | 76 (train)      |
|                                       |             | -          | -                     | 0.9063   | 42 (test)       |

### 177 *Lower flammable limit*

178 As can be seen from the statistical indicators presented in **Table S8**, the *MPE* and *R*<sup>2</sup> values  
179 of both training and test sets resulted in the proposed method are competitive with other  
180 reported methods for the LFL property. Considering the obtained *MPE*, the MDNN model  
181 performs better than the previous LFL models of Frutiger *et al.*<sup>7</sup> with the same data set.  
182 Mendiburu *et al.*<sup>24</sup> reported a decent model only for C-H compounds at some specified  
183 temperatures, however, their model cannot be compared directly with the MDNN model since  
184 they employed far less samples on one family of chemicals. The methods of Albahri<sup>25</sup>, Rowley  
185 *et al.*<sup>22</sup>, Seaton<sup>23</sup> and Lazzús<sup>26</sup> performed slightly better.

186 **Table S8.** The comparison of the proposed model with other existing models for predicting LFL.

| Models                              | Model type | <i>MPE</i> (%) | <i>R</i> <sup>2</sup> | No. of data     |
|-------------------------------------|------------|----------------|-----------------------|-----------------|
| The current model                   | MDNN       | 16.27          | 0.9877                | 306 (train)     |
|                                     |            | 19.87          | 0.9619                | 67 (validation) |
|                                     |            | 19.26          | 0.7435                | 67 (test)       |
| Frutiger <i>et al.</i> <sup>7</sup> | MLR-GC     | 15.9           | 0.91                  | 443 (train)     |
| Rowley <i>et al.</i> <sup>22</sup>  | MLR-GC     | 10.67          | -                     | 509 (train)     |
| Seaton <sup>23</sup>                | NLR-GC     | 10.0           | -                     | 152 (train)     |

|                                       |          |      |        |             |
|---------------------------------------|----------|------|--------|-------------|
| Albahri <sup>25</sup>                 | MLR-GC   | 4.1  | 0.93   | 472 (train) |
|                                       |          | 0.02 | -      | 18 (test)   |
| Gharagheizi <sup>27</sup>             | MLR-QSPR | 6.70 | 0.9698 | 845 (train) |
|                                       |          | 6.65 | 0.9728 | 211 (test)  |
| Gharagheizi <sup>28</sup>             | ANN-GC   | 4.35 | 0.99   | 846 (train) |
|                                       |          | 5.70 | 0.971  | 211 (test)  |
| Lazzus <sup>26</sup>                  | ANN-GC   | 8.6  | 0.9876 | 328 (train) |
|                                       |          | 8.5  | 0.9819 | 90 (test)   |
| Mendiburu <i>et al.</i> <sup>24</sup> | NLR-QSPR | -    | 0.9652 | 60 (train)  |
|                                       |          | -    | 0.9239 | 60 (test)   |
| Pan <i>et al.</i> <sup>29</sup>       | SVM-QSPR | -    | 0.979  | 830 (train) |
|                                       |          | -    | 0.979  | 208 (test)  |

187 Gharagheizi<sup>27,28</sup> and Pan *et al.*<sup>29</sup> correlated more compounds but involving experimental  
188 and prediction values. In fact, there are also many small values of LFL, which could be a reason  
189 of the high relative residuals.

#### 190 *Upper flammable limit*

191 Among most published studies, the prediction accuracy of the existing models for UFLs  
192 is lower than the accuracy of the models for LFLs. The lower accuracy of these models for the  
193 UFLs could be related to the larger discreteness of the available data set. According to **Table**  
194 **S7**, the correlation and prediction of UFL achieved by the MDNN is compared with the previous  
195 methods. As with the models for other properties, the correlation models proposed by Frutiger  
196 *et al.*<sup>7</sup>, Albahri<sup>25</sup>, Gharagheizi<sup>30</sup>, Pan *et al.*<sup>31</sup>, Lazzús<sup>26</sup>, High and Danner<sup>32</sup>, Seaton<sup>23</sup> and  
197 Mendiburu<sup>33</sup> require the information related to molecular structures such as the occurrence of  
198 molecular groups, numerical molecular descriptors or other manually extracted features of  
199 molecular structures. Hereinto, the best correlation with  $R^2$  of 0.9776 for the total set of  
200 flammable compounds were achieved by Lazzús<sup>26</sup> but with fewer substances employed than  
201 the compounds employed in the method reported by Gharagheizi<sup>30</sup>. However, Gharagheizi<sup>30</sup>  
202 employed the predicted and experimental values simultaneously.

203 **Table S9.** The comparison of the proposed model with the previous models for predicting UFL.

| Models            | Model types | $MPE$ | $R^2$  | No. of data     |
|-------------------|-------------|-------|--------|-----------------|
| The current model | MDNN        | 18.77 | 0.9238 | 232 (train)     |
|                   |             | 18.99 | 0.5703 | 49 (validation) |
|                   |             | 24.15 | 0.6868 | 54 (test)       |

|                                       |                                               |      |        |             |
|---------------------------------------|-----------------------------------------------|------|--------|-------------|
| Frutiger <i>et al.</i> <sup>7</sup>   | MLR-GC                                        | 15.9 | 0.91   | 351 (train) |
| High and Danner <sup>32</sup>         | NLR-GC                                        | 26.4 | -      | 181 (train) |
| Seaton <sup>23</sup>                  | NLR-GC                                        | 20.0 | -      | 152 (train) |
| Albahri <sup>25</sup>                 | MLR-GC                                        | 11.8 | 0.96   | 475 (train) |
|                                       |                                               | 0.41 | -      | 13 (test)   |
| Pan <i>et al.</i> <sup>31</sup>       | GA-MLR-QSPR                                   | -    | 0.758  | 579 (train) |
| Gharagheizi <sup>30</sup>             | GA-MLR-QSPR                                   | 9.55 | 0.9202 | 693 (train) |
|                                       |                                               | 9.58 | 0.9199 | 172 (test)  |
| Lazzus <sup>26</sup>                  | PSO-ANN-GC                                    | 7.0  | 0.9780 | 328 (train) |
|                                       |                                               | 7.5  | 0.9771 | 90 (test)   |
| Mendiburu <i>et al.</i> <sup>33</sup> | combustion theory and<br>chemical equilibrium | 9.66 | 0.9382 | 136 (train) |
|                                       |                                               | 7.63 | 0.9188 | 72 (test)   |

## 204 S7. The applicability domains and outlier detection

205 The convex hulls define the interpolation regions in the target properties and molecular  
 206 feature vectors. The boundary of a convex hull describes the smallest convex area covering the  
 207 training and validation sets. It is easy to calculate the convex hull covering a data set in the  
 208 software package, SciPy<sup>37</sup>. The results of calculation were visualized by a python  
 209 implementation of VTK<sup>38</sup>. **Figures S6-S9** show the convex hulls representing the ADs of four  
 210 properties in the initially learned model ( I ).

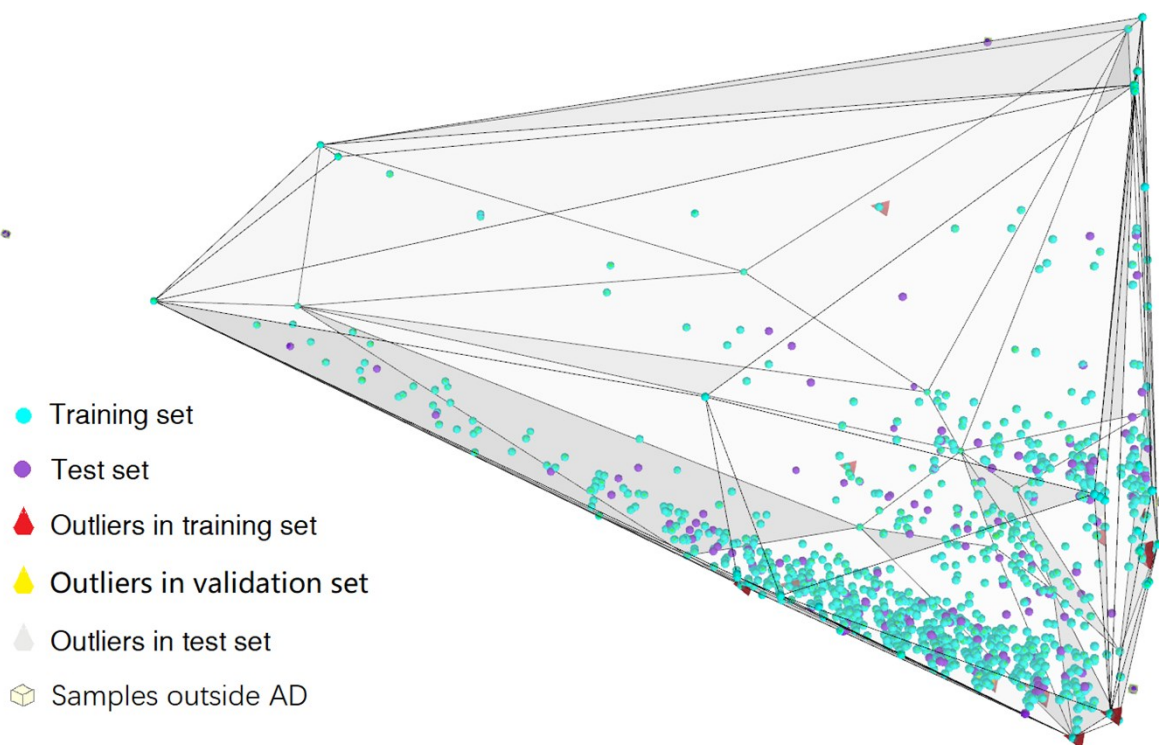

212  
213

**Figure S6.** The convex hull representing the AD for FPT

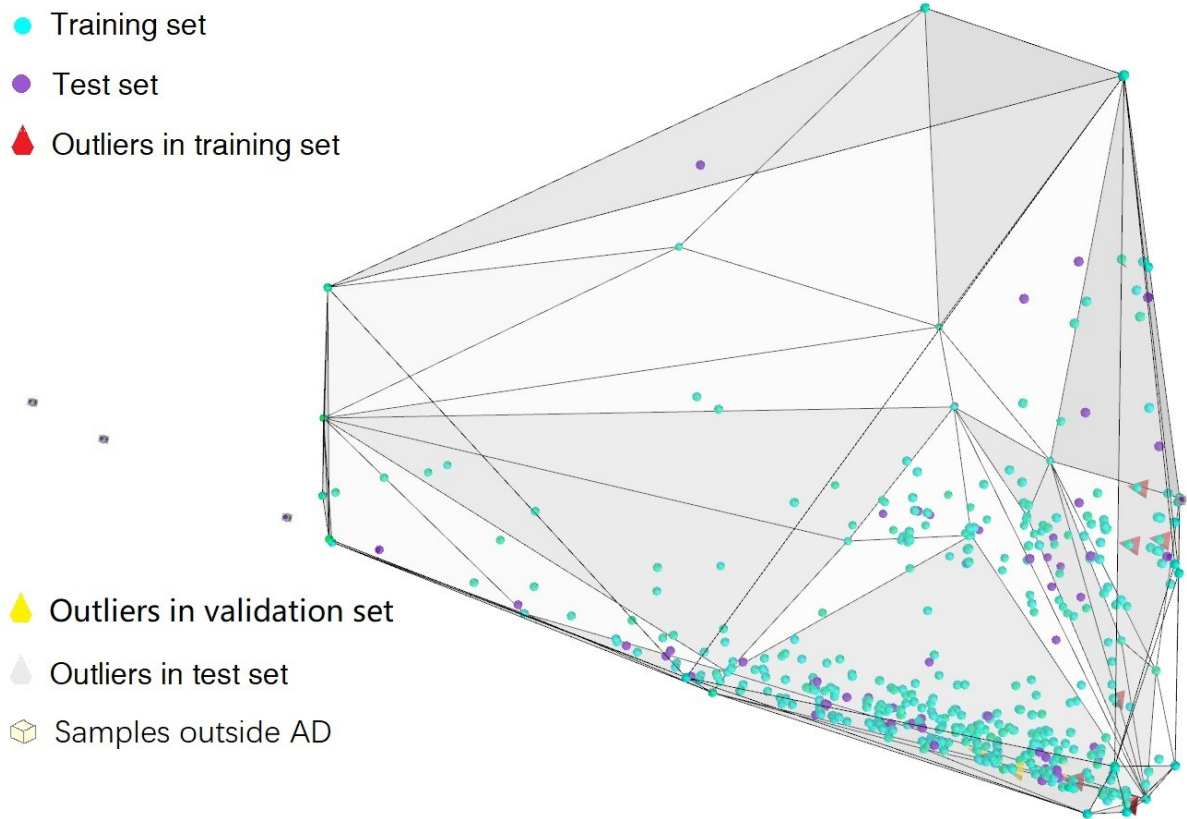

214  
215

**Figure S7.** The convex hull representing the AD for AIT

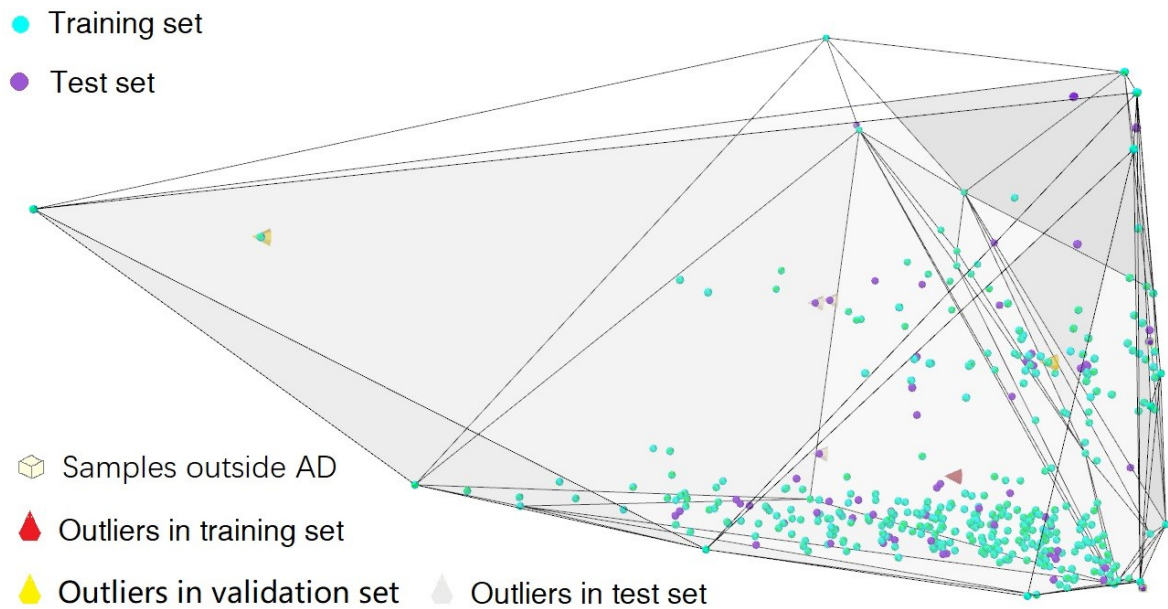

216  
217

**Figure S8.** The convex hull representing the AD for LFL

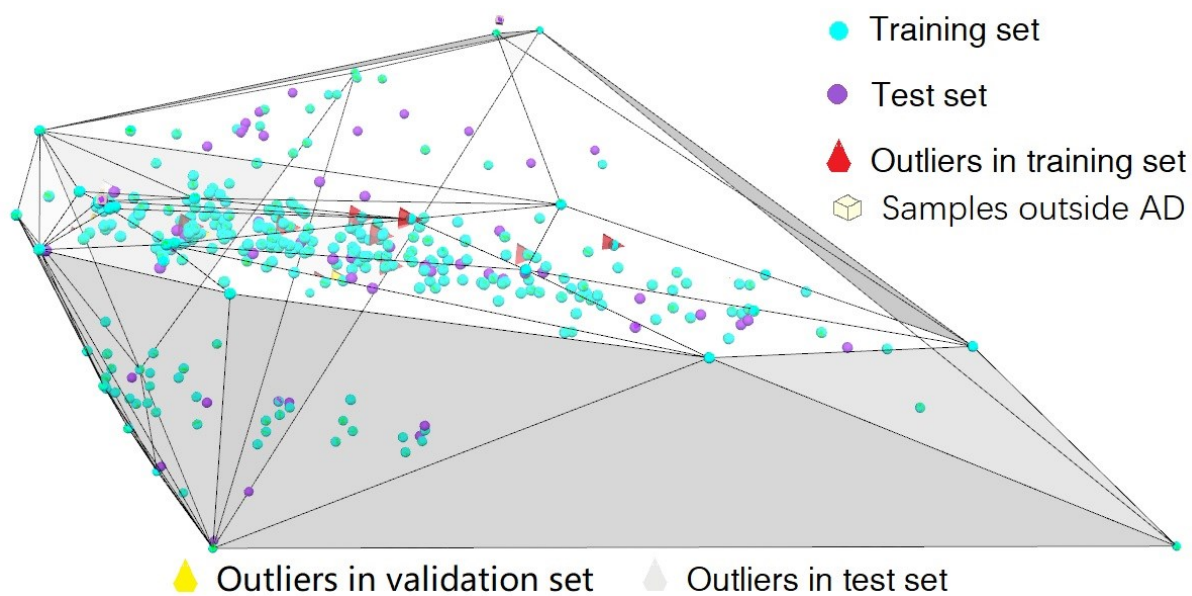

218

219

220

221

**Figure S9.** The convex hull representing the AD for UFL

The residual ECDFs of four properties are shown in **Figure S10** for the model ( I ).

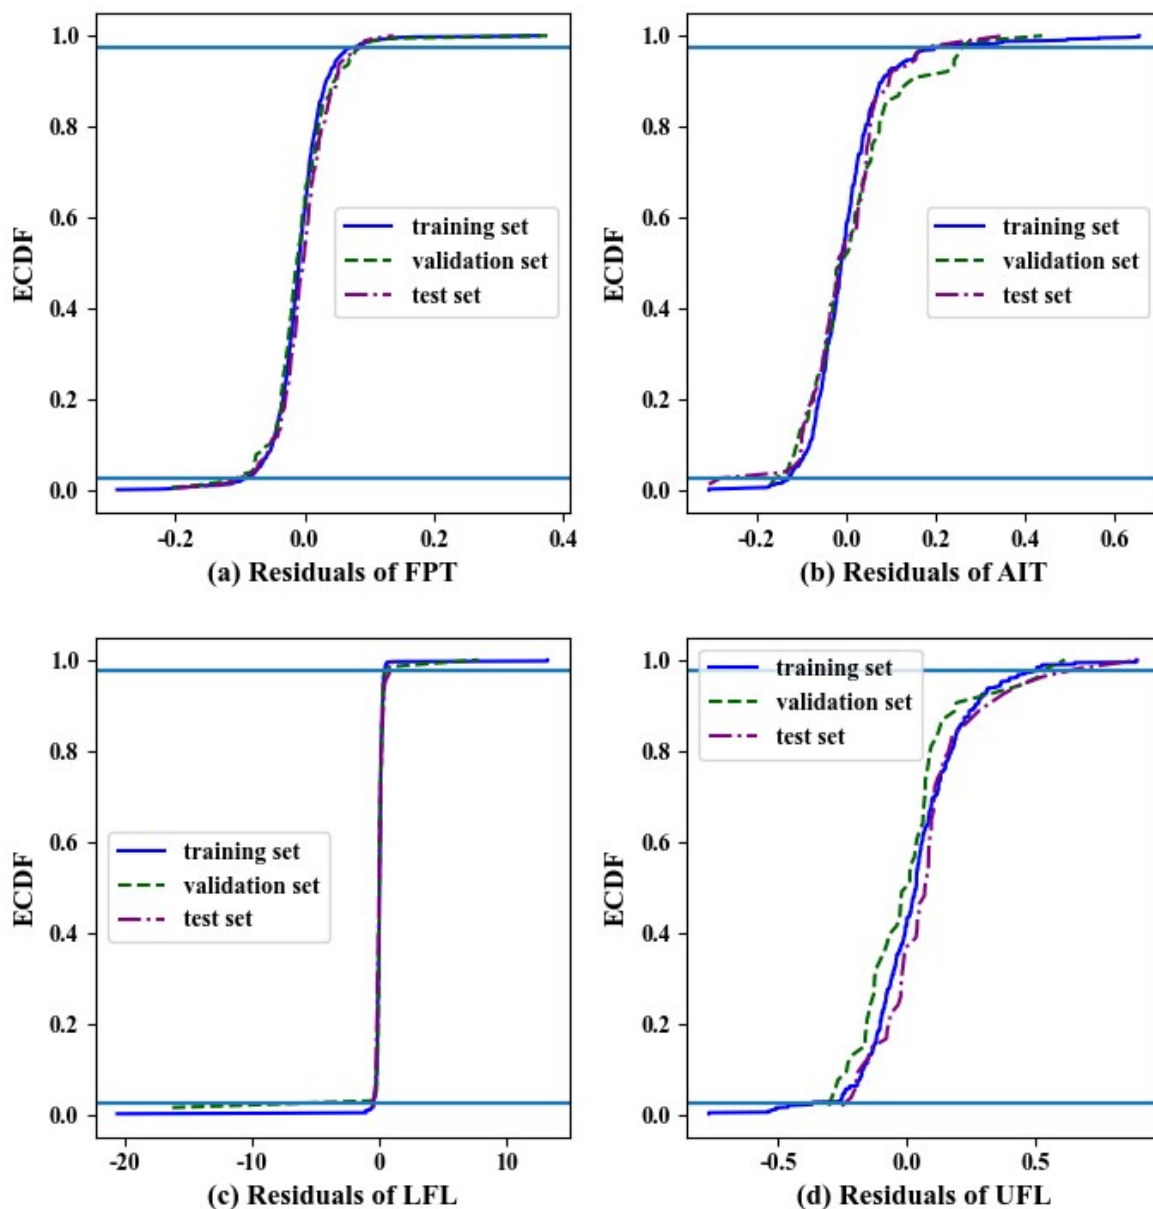

222

223 **Figure S10.** The plots of residual ECDFs for the training, validation, and test sets of: (a) FPT; (b) AIT;  
 224 (c) LFL; (d) UFL.

225

226 The outlier compounds were identified by ECDF from the training and validation sets,  
 227 which are listed in **Table S10**. As these compounds were excluded from the training and  
 228 validation sets, the ADs were narrowed.

229

230

**Table S10.** The outliers identified from the training and validation sets.

| FPT              | AIT          | LFL        | UFL           |
|------------------|--------------|------------|---------------|
| ISOPROPYL IODIDE | DIETHANOLAMI | DIISODECYL | 1,2-PROPYLENE |
|                  | NE           | PHTHALATE  | OXIDE         |
| N,N-             | CITRIC ACID  | DIOCTYL    | 1-ETHOXY-2-   |

|                         |                           |                      |                                       |
|-------------------------|---------------------------|----------------------|---------------------------------------|
| DIMETHYLFORMAMIDE       |                           | PHTHALATE            | PROPANOL                              |
| DIMETHYLCHLOROSILANE    | FUMARIC ACID              | METHYLGLUTARONITRILE | TETRAMETHYLSILANE                     |
| 1,5,9-CYCLODODECATRIENE | FORMIC ACID               | DIISOCTYL PHTHALATE  | 1,3-PROPYLENE OXIDE                   |
| DIMETHYL SULFOXIDE      | PYRENE                    | m-DIVINYLBENZENE     | PHENYLTRICHLOROSILANE                 |
| DIVINYL ETHER           | TRI-n-OCTYLAMINE          | -                    | 1,2-EPOXYBUTANE                       |
| tert-BUTYLFORMAMIDE     | NICOTINONITRILE           | -                    | NEOPENTYL GLYCOL                      |
| PROPYLENE CARBONATE     | ETHANE                    | -                    | DIETHYLENE GLYCOL ETHYL ETHER ACETATE |
| 1,2,3-TRIMETHYLINDENE   | FORMAMIDE                 | -                    | TETRAMETHYLETHYLENEDIAMINE            |
| n-PROPYL IODIDE         | TRIAMYLAMINE              | -                    | BROMOETHANE                           |
| TETRAETHYL SILANE       | TRI-o-CRESYL PHOSPHATE    | -                    | METHYLGLUTARONITRILE                  |
| N,N-DIMETHYLACETAMIDE   | PROPIONIC ANHYDRIDE       | -                    | MONOETHANOLAMINE                      |
| N-METHYLFORMAMIDE       | 5-METHYL-2-HEXANONE       | -                    | 2-(2-HEXOXYETHOXY)ETHANOL             |
| ETHYLENE CARBONATE      | 2-(2-BUTOXYETHOXY)ETHANOL | -                    | DIPROPYLENE GLYCOL n-PROPYL ETHER     |
| 3-IODO-1-PROPENE        | ISOPRENE                  | -                    | 1,2-DIMETHOXYETHANE                   |
| N-METHYLACETAMIDE       | METHYL ACETOACETATE       | -                    | TRIMETHYLAMINE                        |
| IMIDAZOLE               | TETRAFLUOROTHYLENE        | -                    | BENZOYL CHLORIDE                      |
| HYDRAZINE               | ACETALDEHYDE              | -                    | 1,1-DIFLUOROETHYLENE                  |
| FORMAMIDE               | DIGLYCOLIC ACID           | -                    | DECAMETHYLCYCLOPENTASILOXANE          |
| 3-BROMO-1-PROPENE       | BENZALDEHYDE              | -                    | 2-BUTYNE-1,4-DIOL                     |
| ISOPHORONE              | o-NITROTOLUENE            | -                    | VINYL BROMIDE                         |



|                                 |                            |   |              |
|---------------------------------|----------------------------|---|--------------|
| SULFOLANE                       | PHENYLHYDRAZINE            | - | ADIPONITRILE |
| CHLOROTRIFLUOROETHYLENE         | BENZOYL PEROXIDE           | - | -            |
| DIKETENE                        | 3,4-DICHLOROANILINE        | - | -            |
| DICHLOROACETALDEHYDE            | CUMENE HYDROPEROXIDE       | - | -            |
| 2,3-DIHYDROFURAN                | 2-METHYLPROPANAL           | - | -            |
| DICUMYL PEROXIDE                | 2-(2-METHOXYETHOXY)ETHANOL | - | -            |
| METHANE                         | 1,2,3-TRICHLOROPROpane     | - | -            |
| METHYL alpha-HYDROXYISOBUTYRATE | ACETIC ANHYDRIDE           | - | -            |
| DI-t-BUTYL PEROXIDE             | DIGLYCOLIC ACID            | - | -            |
| CYCLOPENTANONE                  | o-NITROTOLUENE             | - | -            |
| FURAN                           | -                          | - | -            |
| N-METHYLPYRROLE                 | -                          | - | -            |
| tert-BUTYLAMINE                 | -                          | - | -            |
| 1,3-DIFLUOROBENZENE             | -                          | - | -            |
| METHACRYLONITRILE               | -                          | - | -            |
| 2-NORBORNENE                    | -                          | - | -            |
| FLUOROBENZENE                   | -                          | - | -            |
| ETHYLENEIMINE                   | -                          | - | -            |
| SALICYLALDEHYDE                 | -                          | - | -            |
| 2-METHYL-2-AMINOBUTANE          | -                          | - | -            |
| 1,4-DIFLUOROBENZENE             | -                          | - | -            |
| METHYL SALICYLATE               | -                          | - | -            |
| PIPERIDINE                      | -                          | - | -            |
| TETRYL                          | -                          | - | -            |
| METHOXYDIHYDROPY                | -                          | - | -            |

---

231

232 The changes of ADs were studied when the outliers were excluded. The changed convex  
233 hulls painted blue are shown in **Figure S11-S14**, the red wireframes depict the original ADs of  
234 model (I). After the outliers identified by ECDF were excluded from the training and  
235 validation sets, the convex hulls representing ADs of the model (II) were narrowed. Hereinto,  
236 more obvious changes happened on the ADs of LFL and FPT. It could be suggested that the  
237 less samples may decrease the prediction ability of the MDNN model.

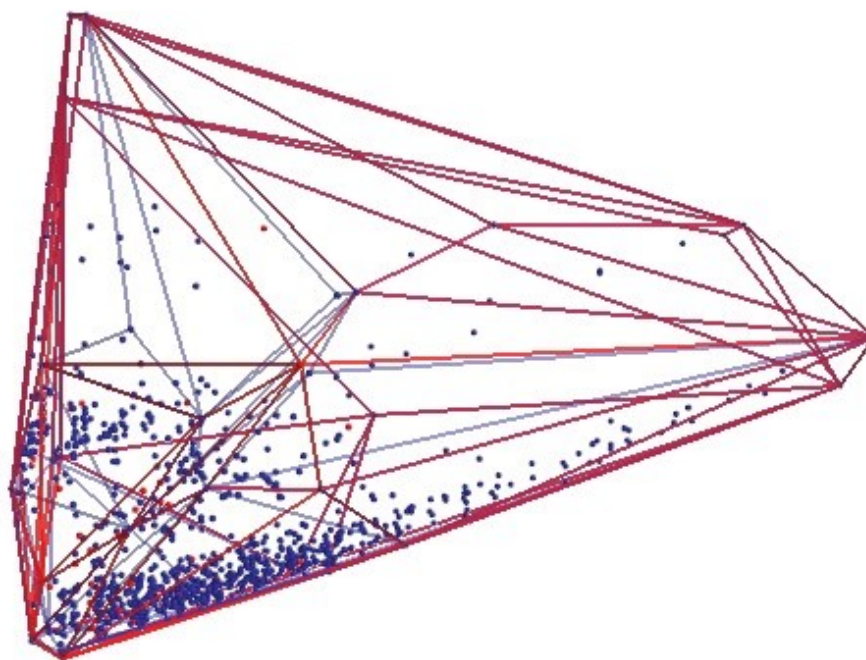

238

239

**Figure S11.** The convex hulls representing the changed and original ADs for FPT

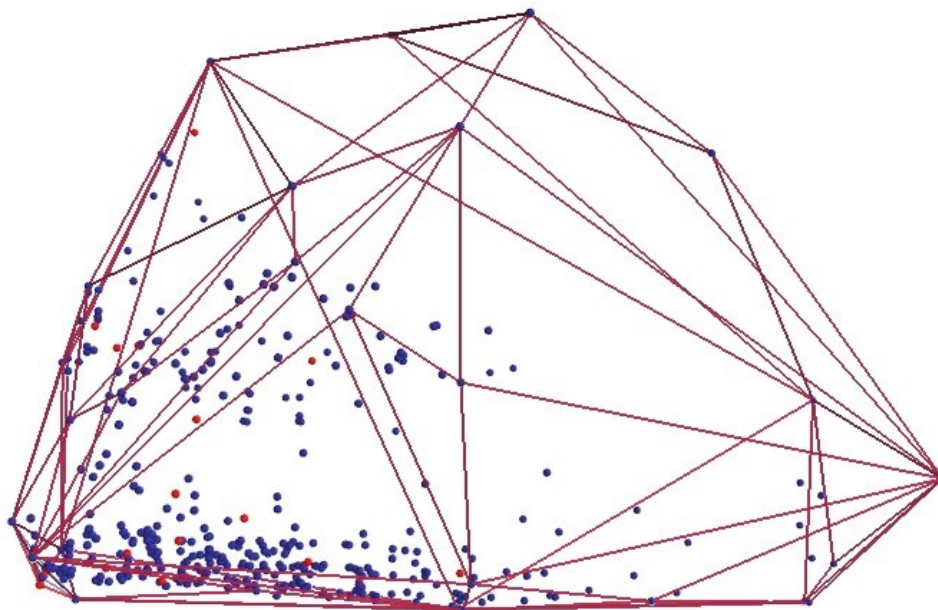

240

241

**Figure S12.** The convex hulls representing the changed and original ADs for AIT

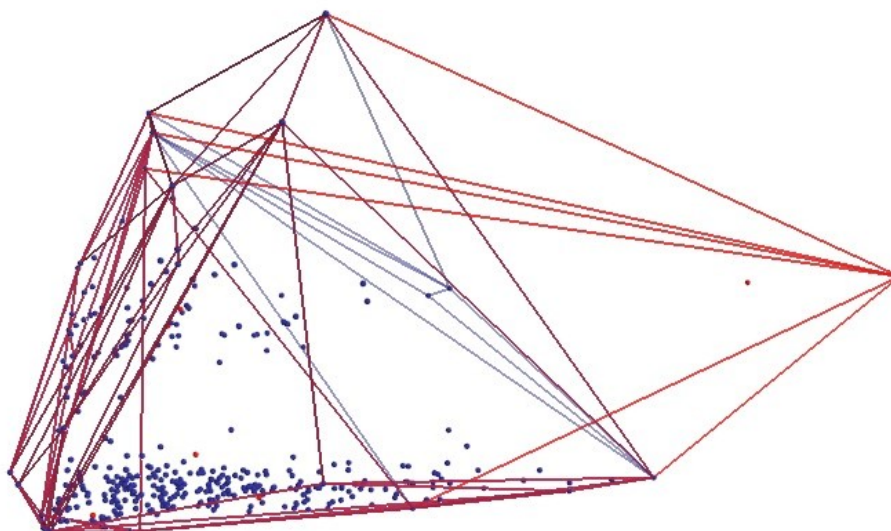

242

243

244

**Figure S13.** The convex hulls representing the changed and original ADs for LFL

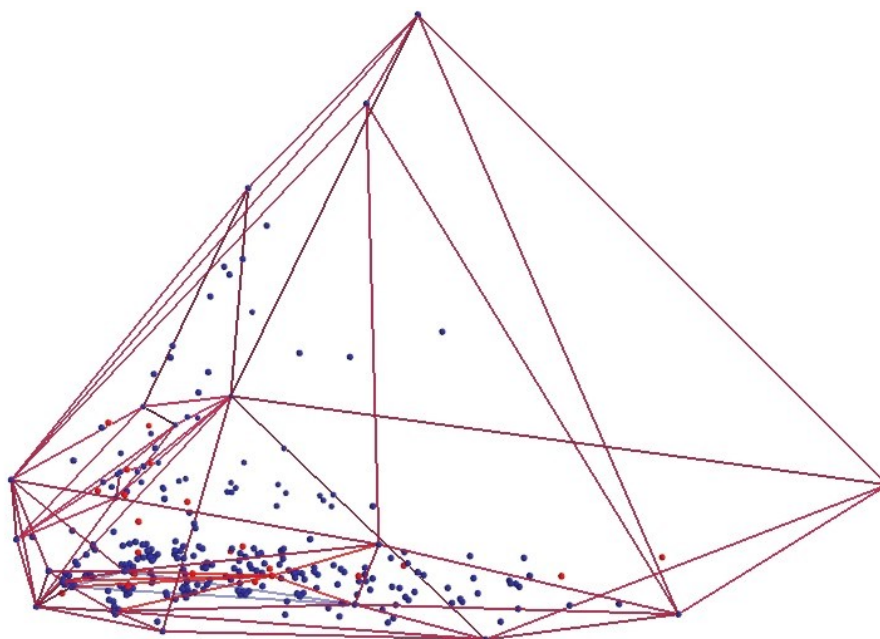

**Figure S14.** The convex hulls representing the changed and original ADs for UFL

245  
246  
247

248 We also tried to exclude the outliers from the training and validation sets of all properties  
249 and then re-trained the MDNN. As shown in **Table S11**, the obtained model performed better  
250 on the training and validation sets but only improved on test set of UFL. Even the reductions of  
251  $r$  and  $R^2$  could be observed on the test sets of AIT and LFL. After the samples outside the ADs,  
252 the values of  $r$  and  $R^2$  increased for LFL significantly.

253 **Table S11.** The performance statistics of the re-trained MDNN model without all outliers

|                   |                | FPT (K)                    | AIT (K)                    | LFL (%)                    | UFL (%)                    |
|-------------------|----------------|----------------------------|----------------------------|----------------------------|----------------------------|
| <i>MAE</i>        | Training set   | 10.15/8.995 <sup>a</sup>   | 34.02/30.21 <sup>a</sup>   | 0.2398/0.3207 <sup>a</sup> | 2.366/1.759 <sup>a</sup>   |
|                   | Validation set | 11.49/9.695 <sup>a</sup>   | 40.65/32.74 <sup>a</sup>   | 0.2772/0.3066 <sup>a</sup> | 3.026/2.430 <sup>a</sup>   |
|                   | Test set       | 13.56/12.59 <sup>b</sup>   | 56.12/54.34 <sup>b</sup>   | 0.3881/0.2617 <sup>b</sup> | 2.439/2.505 <sup>b</sup>   |
| <i>MPE</i><br>(%) | Training set   | 3.120/2.729 <sup>a</sup>   | 5.367/4.519 <sup>a</sup>   | 16.27/17.77 <sup>a</sup>   | 18.77/13.46 <sup>a</sup>   |
|                   | Validation set | 3.401/2.937 <sup>a</sup>   | 6.443/5.490 <sup>a</sup>   | 19.87/12.10 <sup>a</sup>   | 18.99/17.32 <sup>a</sup>   |
|                   | Test set       | 4.001/3.762 <sup>b</sup>   | 9.234/8.889 <sup>b</sup>   | 19.26/16.77 <sup>b</sup>   | 24.15/24.45 <sup>b</sup>   |
| $r$               | Training set   | 0.9808/0.9871 <sup>a</sup> | 0.9421/0.9204 <sup>a</sup> | 0.9754/0.9880 <sup>a</sup> | 0.9623/0.9633 <sup>a</sup> |
|                   | Validation set | 0.9643/0.9836 <sup>a</sup> | 0.9135/0.9389 <sup>a</sup> | 0.9809/0.9812 <sup>a</sup> | 0.7832/0.8608 <sup>a</sup> |
|                   | Test set       | 0.9554/0.9595 <sup>b</sup> | 0.8020/0.8015 <sup>b</sup> | 0.8876/0.9736 <sup>b</sup> | 0.8752/0.8490 <sup>b</sup> |
| $R^2$             | Training set   | 0.9541/0.9775 <sup>a</sup> | 0.8845/0.9067 <sup>a</sup> | 0.9877/0.9586 <sup>a</sup> | 0.9238/0.9693 <sup>a</sup> |
|                   | Validation set | 0.9214/0.9616 <sup>a</sup> | 0.8173/0.8778 <sup>a</sup> | 0.9619/0.9625 <sup>a</sup> | 0.5703/0.6254 <sup>a</sup> |
|                   | Test set       | 0.9022/0.9105 <sup>b</sup> | 0.5985/0.5920 <sup>b</sup> | 0.7435/0.9417 <sup>b</sup> | 0.6868/0.6107 <sup>b</sup> |

254 NOTE: <sup>a</sup>This value was obtained on the data set without the outliers identified by ECDF.

255 <sup>b</sup>This value was obtained on the data points only involved in the AD determined by training and validation  
256 sets.

257 **S8. Distributions of compounds in various families**

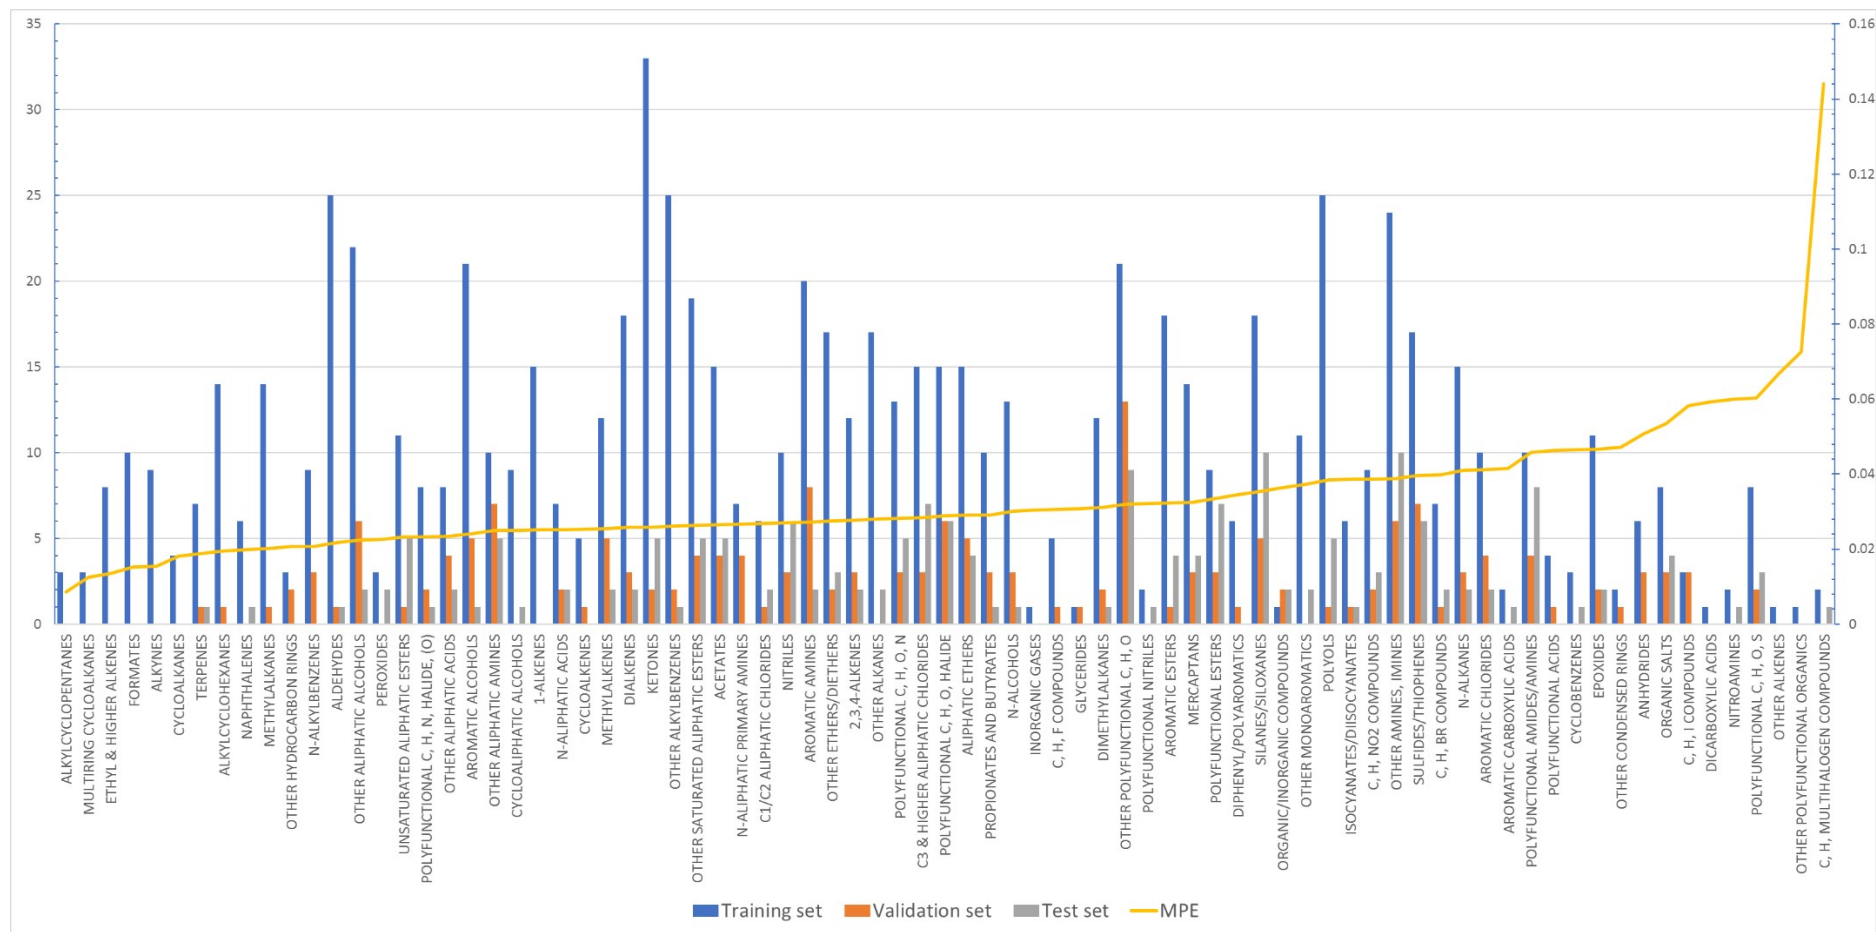

258

259

**Figure S15.** The distribution plot of compounds in each family with MPE for FPT

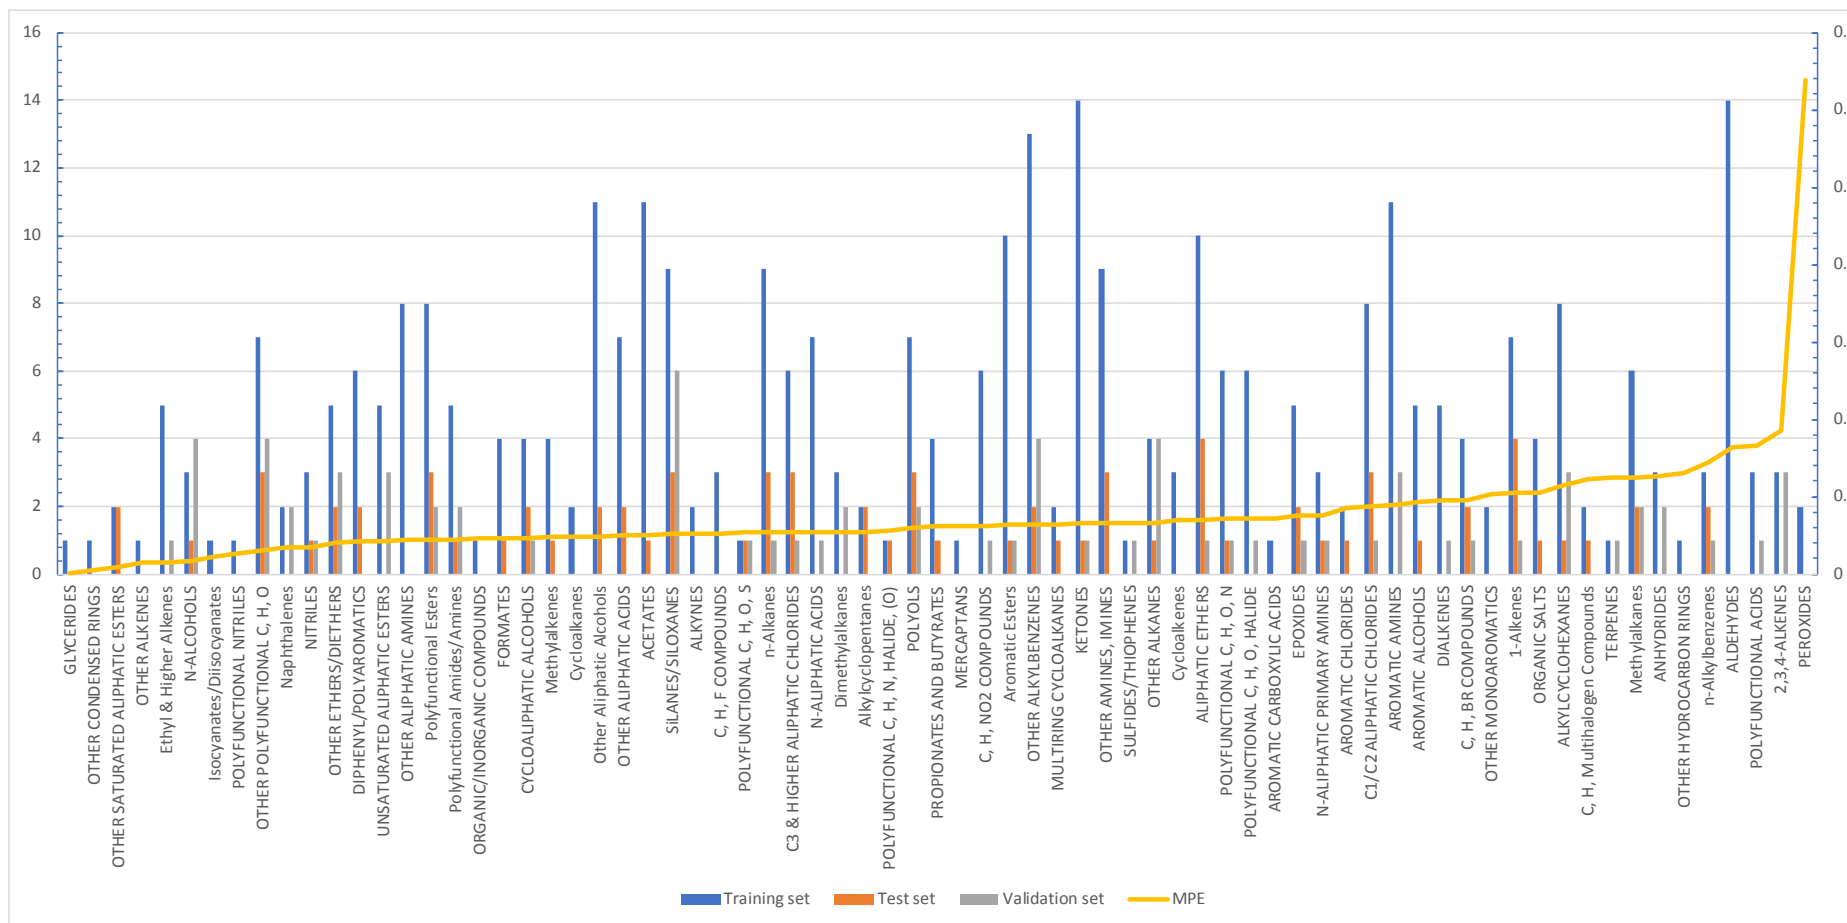

Figure S16. The distribution plot of compounds in each family with MPE for AIT

260

261

262

263

264

265

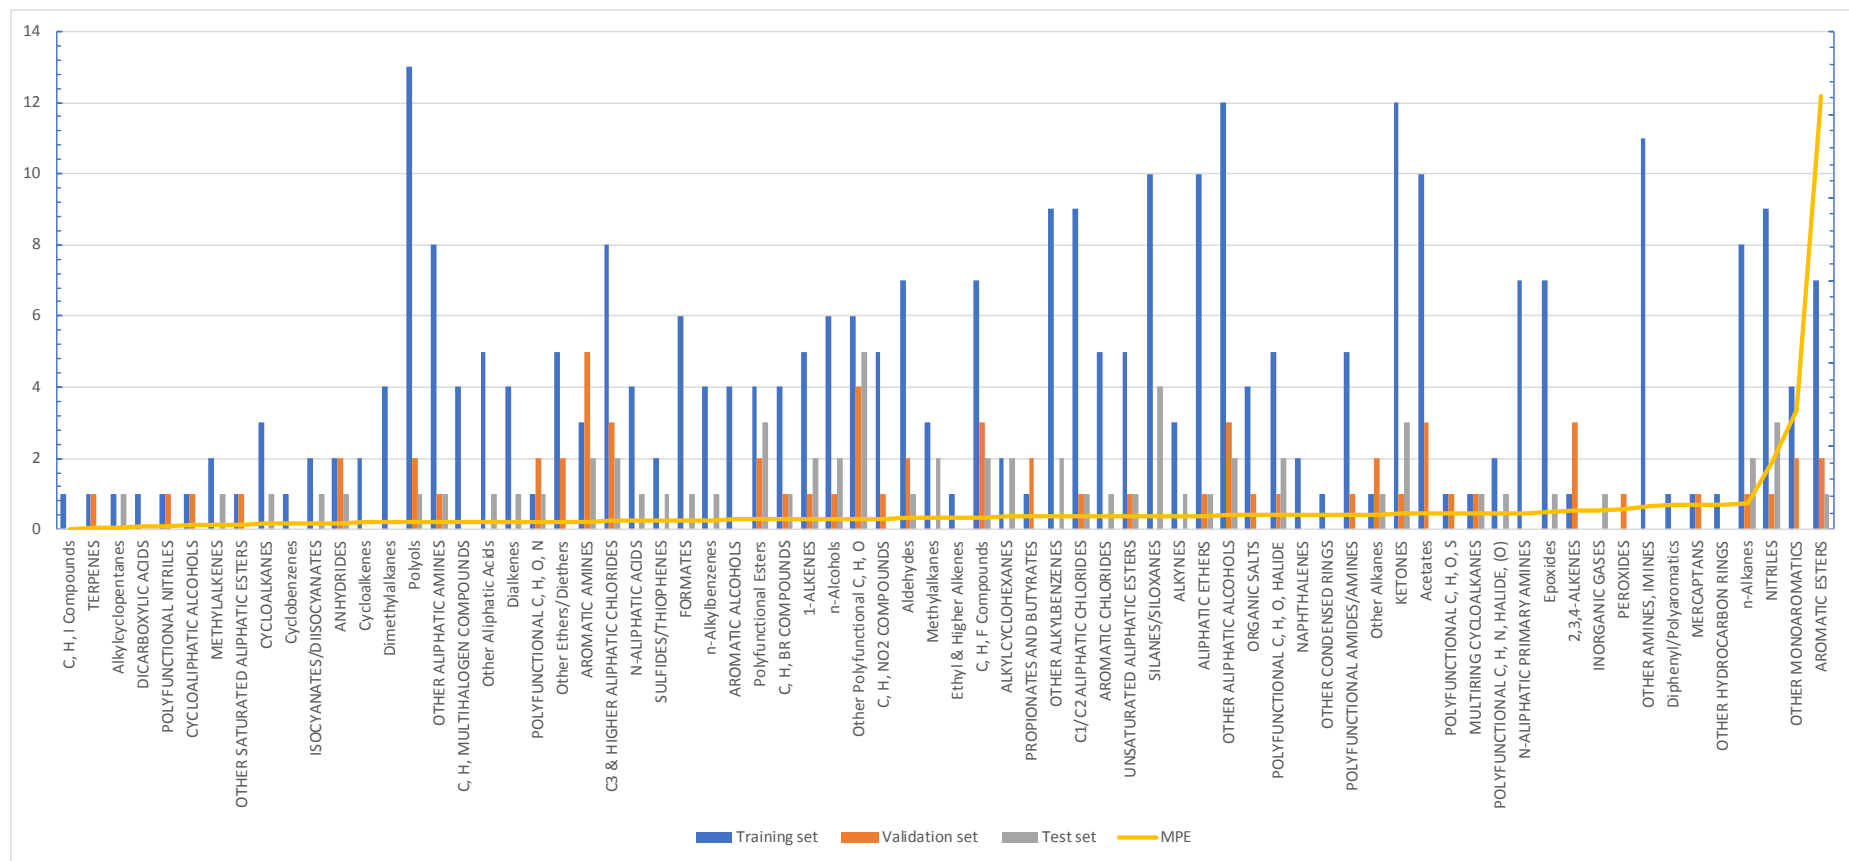

266

267

**Figure S17.** The distribution plot of compounds in each family with MPE for LFL

268

269

270

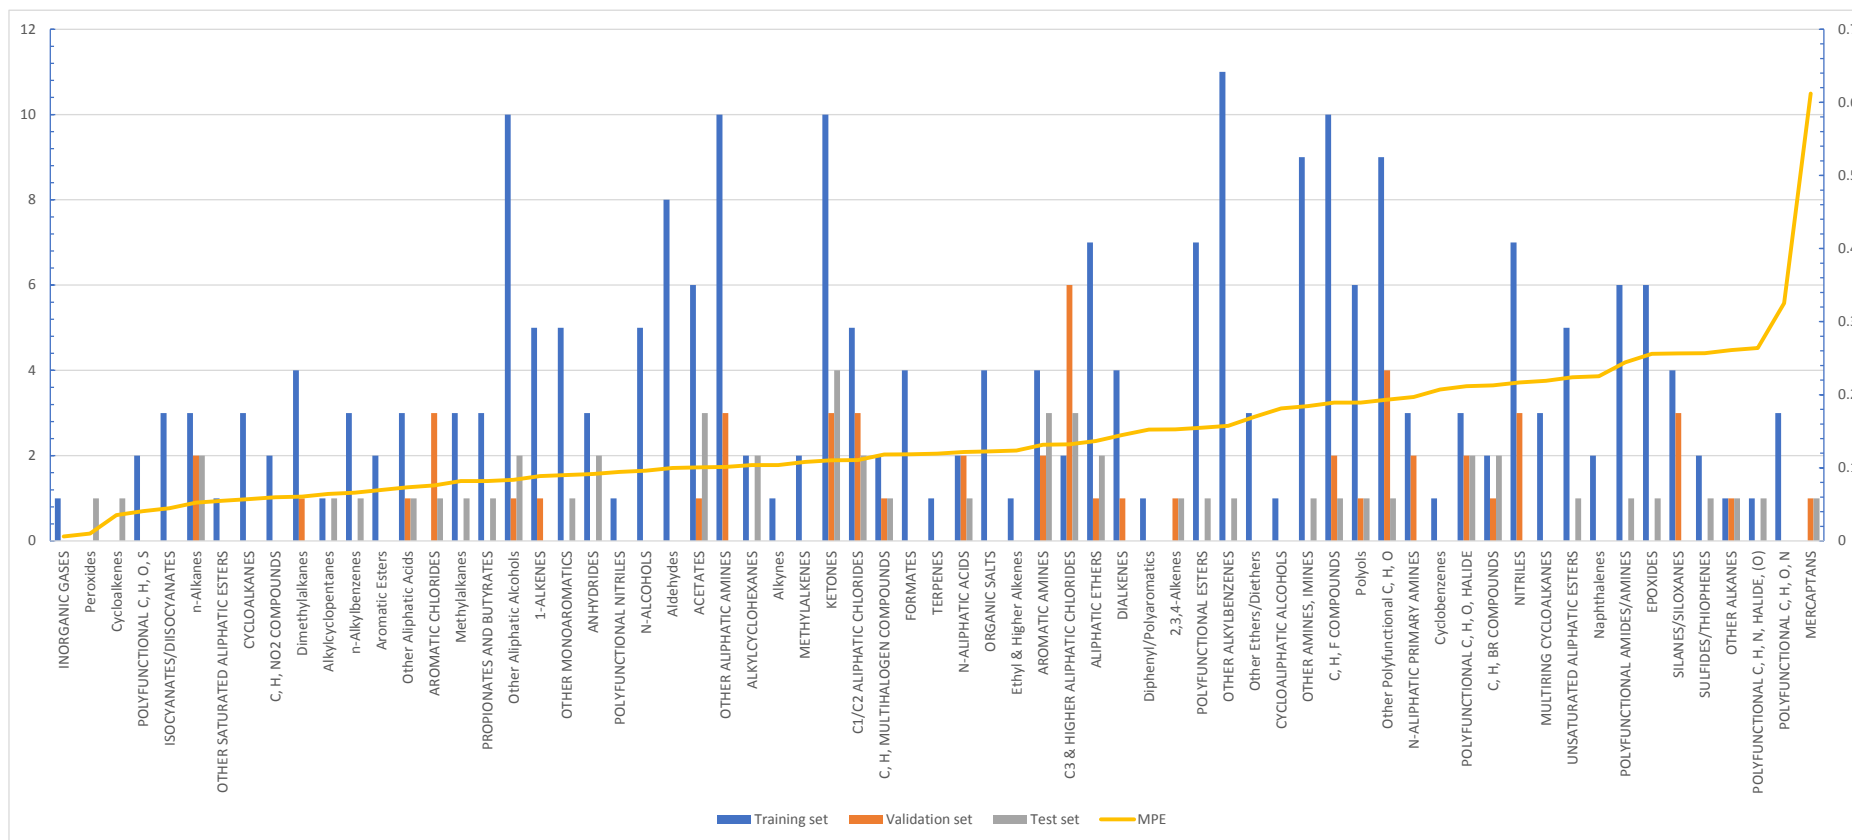

271

272

273

**Figure S18.** The distribution plot of compounds in each family with MPE for UFL



## 274 **S8. Information of Software and Hardware**

### 275 *Software*

276 Data analysis tool: scikit-learn<sup>34</sup>, SciPy<sup>37</sup>

277 Deep learning framework: PyTorch<sup>35</sup>

278 Chemical information software: RDKit<sup>36</sup>

279 Data visualization: VTK<sup>38</sup>

### 280 *Hardware*

281 PC: Intel Core i5-8400 with 24GB RAM and Nvidia GeForce GTX 1060

## 282 **S8. Acronyms**

|     |           |                                              |
|-----|-----------|----------------------------------------------|
| 283 | ANN       | Artificial Neural Network                    |
| 284 | CNN       | Convolutional Neural Network                 |
| 285 | DNN       | Deep Neural Network                          |
| 286 | FNN       | Feedforward neural network                   |
| 287 | GC        | Group Contribution                           |
| 288 | LSTM      | Long Short-Term Memory                       |
| 289 | MLR       | Multiple Linear Regression                   |
| 290 | QSPR      | Quantitative Structure Property Relationship |
| 291 | RNN       | Recurrent Neural Network                     |
| 292 | SMILES    | Simplified Molecular Input Line Entry System |
| 293 | TI        | Topological Index                            |
| 294 | TIs       | Topological Indices                          |
| 295 | Tree-LSTM | Tree-structured Long Short-Term Memory       |

## 296 **S9. Notations and Symbols**

|     |               |                                                                              |
|-----|---------------|------------------------------------------------------------------------------|
| 297 | $c_j$         | cell state vector of the Tree-LSTM unit                                      |
| 298 | $f_{jk}$      | forget gate's activation vector from child nodes of the $j^{\text{th}}$ node |
| 299 | $h_j$         | output vector of the Tree-LSTM unit of the $j^{\text{th}}$ node              |
| 300 | $\tilde{h}_j$ | the sum of output vector from the child nodes of the $j^{\text{th}}$ node    |
| 301 | $i_j$         | input gate's activation vector of the $j^{\text{th}}$ node                   |

|     |                                               |                                                                        |
|-----|-----------------------------------------------|------------------------------------------------------------------------|
| 302 | $N$                                           | the number of observations in the sample                               |
| 303 | $o_j$                                         | output gate's activation vector of the $j^{\text{th}}$ node            |
| 304 | $W^{(i,u,o,f)}, U^{(i,u,o,f)}, b^{(i,u,o,f)}$ | weights and biases of the formula calculating vector $i, u, o$ and $f$ |
| 305 | $x_i$                                         | the observed values of the sample item $i$                             |
| 306 | $x_j$                                         | input vector to the Tree-LSTM unit of the $j^{\text{th}}$ node         |
| 307 | $x_i^{exp}$                                   | the experimental value of sample item $i$                              |
| 308 | $x_i^{prep}$                                  | the prediction value of sample item $i$                                |
| 309 | $\bar{x}^{exp}$                               | the mean value of these observations                                   |
| 310 | $\sigma$                                      | sigmoid function                                                       |
| 311 | $\bullet$                                     | multiply each element between two tensors                              |

## 312 References

- 313 1. Faulon, J. The signature molecular descriptor. 1. using extended valence sequences in  
314 QSAR and QSPR studies. *J. Chem. Inf. Comput. Sci.* **43**, 707–720 (2003).
- 315 2. Mikolov, T., Sutskever, I., Chen, K., Corrado, G. & Dean, J. Distributed Representations  
316 of Words and Phrases and Their Compositionality. arXiv eprint. 2013;arXiv:1310.4546..
- 317 3. McCormick, C. Word2Vec tutorial-the skip-gram model. <http://www.mccormickml.com>. Accessed on March, 9, 2018.  
318
- 319 4. Tai, K. S., Socher, R. & Manning, C. D. Improved semantic representations from tree-  
320 structured long short-term memory networks. *Comput Sci.* 5(1),36 (2015).
- 321 5. Lebet, R. & Collobert, R. Word Emdeddings through Hellinger PCA. arXiv eprint.  
322 2013;arXiv:1312.5542.
- 323 6. Kim, S. *et al.* PubChem 2019 update: improved access to chemical data. *Nucleic Acids*  
324 *Res.* **47**, D1102–D1109 (2019).
- 325 7. Frutiger, J., Marcarie, C., Abildskov, J. & Sin, G. Group-contribution based property  
326 estimation and uncertainty analysis for flammability-related properties. *J. Hazard.*  
327 *Mater.* **318**, 783–793 (2016).
- 328 8. Hukkerikar, A. S. *et al.* Group-contribution+ (GC+) based estimation of properties of  
329 pure components: Improved property estimation and uncertainty analysis. *Fluid Phase*  
330 *Equilib.* **321**, 25–43 (2012).

- 331 9. Suzuki, T. A Method for estimating flash points of organic compounds from molecular  
332 structures. *Jounal Chem. Eng. Japan* **24**, 258–261 (1991).
- 333 10. Khajeh, A. & Modarress, H. QSPR prediction of flash point of esters by means of GFA  
334 and ANFIS. *J. Hazard. Mater.* **179**, 715–720 (2010).
- 335 11. Gharagheizi, F., Alamdari, R. F. & Angaji, M. T. A new neural network-group  
336 contribution method for estimation of flash point temperature of pure components.  
337 *Energy and Fuels* **22**, 1628–1635 (2008).
- 338 12. Pan, Y., Jiang, J., Wang, R., Cao, H. & Zhao, J. Quantitative structure-property  
339 relationship studies for predicting flash points of organic compounds using support  
340 vector machines. *QSAR Comb. Sci.* **27**, 1013–1019 (2008).
- 341 13. Albahri, T. A. MNLR and ANN structural group contribution methods for predicting the  
342 flash point temperature of pure compounds in the transportation fuels range. *Process Saf.*  
343 *Environ. Prot.* **93**, 182–191 (2015).
- 344 14. Patel, S. J., Ng, D. & Mannan, M. S. QSPR flash point prediction of solvents using  
345 topological indices for application in computer aided molecular design. *Ind. Eng. Chem.*  
346 *Res* **48**, 7378–7387 (2009).
- 347 15. Alibakhshi, A., Mirshahvalad, H. & Alibakhshi, S. Prediction of flash points of pure  
348 organic compounds: Evaluation of the DIPPR database. *Process Saf. Environ. Prot.* **105**,  
349 127–133 (2017).
- 350 16. Suzuki, T. Quantitative structure-property relationships for auto-ignition temperatures of  
351 organic compounds. *Fire Mater.* **18**, 81–88 (1994).
- 352 17. Gharagheizi, F. An accurate model for prediction of autoignition temperature of pure  
353 compounds. *J. Hazard. Mater.* **189**, 211–221 (2011).
- 354 18. Albahri, T. A. & George, R. S. Artificial neural network investigation of the structural  
355 group contribution method for predicting pure components auto ignition temperature.  
356 *Ind. Eng. Chem. Res.* **42**, 5708–5714 (2003).
- 357 19. Pan, Y., Jiang, J., Wang, R., Cao, H. & Cui, Y. Predicting the auto-ignition temperatures  
358 of organic compounds from molecular structure using support vector machine. *J.*  
359 *Hazard. Mater.* **164**, 1242–1249 (2009).
- 360 20. Pan, Y., Jiang, J., Wang, R., Cao, H. & Zhao, J. Prediction of auto-ignition temperatures

- 361 of hydrocarbons by neural network based on atom-type electrotopological-state indices.  
362 *J. Hazard. Mater.* **157**, 510–517 (2008).
- 363 21. Design Institute for Physical Properties. Design Institute for Physical Properties,  
364 Sponsored by AIChE. (2005; 2008; 2009; 2010; 2011; 2012; 2015; 2016; 2017; 2018;  
365 2019). DIPPR Project 801 - Full Version. Knovel.
- 366 22. Rowley, J. R., Rowley, R. L. & Wilding, W. V. Estimation of the lower flammability  
367 limit of organic compounds as a function of temperature. *J. Hazard. Mater.* **186**, 551–  
368 557 (2011).
- 369 23. Seaton, W. H. Group contribution method for predicting the lower and the upper  
370 flammable limits of vapors in air. *J. Hazard. Mater.* **27**, 169–185 (1991).
- 371 24. Mendiburu, A. Z., de Carvalho Jr, J. A. & Coronado, C. R. Estimation of lower  
372 flammability limits of CH compounds in air at atmospheric pressure, evaluation of  
373 temperature dependence and diluent effect. *J. Hazard. Mater.* **285**, 409–418 (2015).
- 374 25. Albahri, T. A. Flammability characteristics of pure hydrocarbons. *Chem. Eng. Sci.* **58**,  
375 3629–3641 (2003).
- 376 26. Lazzús, J. A. Neural network/particle swarm method to predict flammability limits in air  
377 of organic compounds. *Thermochim. Acta* **512**, 150–156 (2011).
- 378 27. Gharagheizi, F. Quantitative structure-property relationship for prediction of the lower  
379 flammability limit of pure compounds. *Energy & Fuels* **22**, 3037–3039 (2008).
- 380 28. Gharagheizi, F. A new group contribution-based model for estimation of lower  
381 flammability limit of pure compounds. *J. Hazard. Mater.* **170**, 595–604 (2009).
- 382 29. Pan, Y., Jiang, J., Wang, R., Cao, H. & Cui, Y. A novel QSPR model for prediction of  
383 lower flammability limits of organic compounds based on support vector machine. *J.*  
384 *Hazard. Mater.* **168**, 962–969 (2009).
- 385 30. Gharagheizi, F. Prediction of upper flammability limit percent of pure compounds from  
386 their molecular structures. *J. Hazard. Mater.* **167**, 507–510 (2009).
- 387 31. Pan, Y., Jiang, J., Wang, R., Cao, H. & Cui, Y. Prediction of the upper flammability  
388 limits of organic compounds from molecular structures. *Ind. Eng. Chem. Res.* **48**, 5064–  
389 5069 (2009).
- 390 32. High, M. S. & Danner, R. P. Prediction of upper flammability limit by a group

- 391 contribution method. *Ind. Eng. Chem. Res.* **26**, 1395–1399 (1987).
- 392 33. Mendiburu, A. Z., de Carvalho, J. A. & Coronado, C. R. Determination of upper  
393 flammability limits of CHO compounds in air at reference temperature and atmospheric  
394 pressure. *Fuel* **188**, 212–222 (2017).
- 395 34. Pedregosa, F. *et al.* Scikit-learn: Machine Learning in Python. *J. Mach. Learn. Res.* **12**,  
396 2825–2830 (2013).
- 397 35. Paszke, A., Gross, S., Chintala, S. & Chanan, G. Pytorch: Tensors and dynamic neural  
398 networks in python with strong gpu acceleration. <https://pytorch.org>. Accessed on  
399 January, 23, 2019.
- 400 36. Landrum, G. RDKit: Open-source cheminformatics software. <http://www.rdkit.org/>,  
401 <https://github.com/rdkit/rdkit>. Accessed on March, 9, 2019.
- 402 37. The SciPy community. SciPy, a Python-based ecosystem of open-source software for  
403 mathematics, science, and engineering.  
404 <https://docs.scipy.org/doc/scipy/reference/generated/scipy.spatial.ConvexHull.html>.  
405 Accessed on May, 6, 2020.
- 406 38. Kitware. The Visualization Toolkit (VTK), <https://vtk.org/>. Accessed on March, 20,  
407 2020.
